# Supplementary material for: Scandium-catalysed intermolecular hydroaminoalkylation of olefins with aliphatic tertiary amines
Source: PubMed Central journal article supplement (PMC5356020; doi:10.1039/c6sc02129h), 2016-07-04

## Supporting Information

### Scandium-Catalyzed Intermolecular Hydroaminoalkylation of Olefins with Aliphatic Tertiary Amines

Adi E. Nako, Juzo Oyamada, Masayoshi Nishiura and Zhaomin Hou\*

*Organometallic Chemistry Laboratory and RIKEN Center for Sustainable Resource Science, RIKEN,  
2-1 Hirosawa, Wako, Saitama 351-0198, Japan*

*houz@riken.jp*

### Contents

|                                                                                 |            |
|---------------------------------------------------------------------------------|------------|
| <b>1. General Methods</b>                                                       | <b>S2</b>  |
| <b>2. Catalyst Screening</b>                                                    | <b>S3</b>  |
| <b>3. Typical Procedure for the Catalytic Alkylation of Amines with Olefins</b> | <b>S4</b>  |
| <b>4. Analytical Data</b>                                                       | <b>S4</b>  |
| <b>5. Kinetic Isotope Effect Experiments</b>                                    | <b>S9</b>  |
| <b>6. Dialkylation of 1k to give 3k</b>                                         | <b>S11</b> |
| <b>7. References</b>                                                            | <b>S12</b> |
| <b>8. <sup>1</sup>H and <sup>13</sup>C NMR Spectra of Products</b>              | <b>S13</b> |

## 1. General Methods

All manipulations were performed under a nitrogen atmosphere by use of standard Schlenk techniques or in an mBRAUN Labmaster glovebox. Nitrogen was purified by passing through a Dryclean column (4 Å molecular sieves, Nikka Seiko Co.) and a Gasclean GC-XR column (Nikka Seiko Co.). Hexane, THF, toluene and benzene (dehydrated, stabilizer-free) were obtained from Kanto Chemical Co. and purified by use of an MBraun SPS-800 solvent purification system. Silica gel column chromatography was performed with Silica Gel 60 N (spherical, neutral, 40-50 mm) obtained from Kanto Chemical Co.  $[\text{Ln}(\text{CH}_2\text{C}_6\text{H}_4\text{NMe}_2\text{-o})_3]$  (Ln = Sc, Y, Lu, Gd, Sm)<sup>1</sup> and  $[(\text{C}_5\text{Me}_5)\text{Sc}(\text{CH}_2\text{C}_6\text{H}_4\text{NMe}_2\text{-o})_2]$ <sup>2</sup> were prepared according to the literature methods. *N,N*-dimethylbutylamine (**1a**), *N,N*-dimethyloctylamine (**1b**), *N,N*-dimethylcyclohexylamine (**1c**), *N,N*-dibutylmethylamine (**1e**), *N*-methylpyrrolidine (**1f**), *d*<sub>3</sub>-*N*-methylpyrrolidine (**1f**<sub>d3</sub>), *N*-methylpiperidine (**1h**) and tropane (**1j**) were commercially available. *N*-methyl,*N*-ethylbutylamine (**1d**), *N*-methyl,4-methylpiperidine (**1i**), *N*-methylhexamethyleneimine (**1g**), and *N,N*-dimethyladamantylamine (**1k**), were prepared *via* the literature method.<sup>3</sup> All olefins were commercially available, except 4-dimethylaminostyrene (**2e**) which was synthesized *via* the literature method.<sup>4</sup> Amines and olefins were all distilled from appropriate drying agents such as CaH<sub>2</sub> and Na. All <sup>1</sup>H NMR and <sup>13</sup>C NMR spectra were recorded on either a JEOL AL-400 MHz instrument or a Bruker AVANCE III HD 500 NMR spectrometer in C<sub>6</sub>D<sub>6</sub> with tetramethylsilane as an internal standard otherwise mentioned. Data are reported as follows: chemical shift in ppm (d), multiplicity (s = singlet, d = doublet, t = triplet, q = quartet, quin = quintet, sex = sextet, sep = septet, m = multiplet, br = broad signal), coupling constant (Hz), integration. Gas chromatography analysis was performed on Shimadzu GC2014 using a capillary column (Agilent J&W GC columns DB-1, 30m, 0.32 mm i.d., 0.25 mm film thickness). High-resolution MS were obtained on a Bruker microTOF-Q III (ESI+).

## 2. Catalyst Screening

In a glovebox,  $[\text{Sc}(\text{CH}_2\text{C}_6\text{H}_4\text{NMe}_2\text{-}o)_3]$  (6 mg, 0.013 mmol) was dissolved in  $\text{C}_6\text{D}_6$  (1.0 mL). To this solution, ferrocene (19 mg, 0.1 mmol), *N,N*-dimethylbutylamine (25 mg, 0.25 mmol), norbornene (26 mg, 0.28 mmol) and  $[\text{Ph}_3\text{C}][\text{B}(\text{C}_6\text{F}_5)_4]$  (16 mg, 0.013 mmol) were added sequentially. The biphasic mixture was transferred to a J Young NMR tube, sealed and a baseline  $^1\text{H}$  NMR spectrum taken. The tube was then heated at 70 °C for 24 hours, and the yield calculated from the internal standard (ferrocene). For entries 5 and 6, the sample was quenched with EtOAc (2 mL) after 24 h at 70 °C, filtered and the volatiles removed *in vacuo* to remove the paramagnetic catalyst.

**Table S1. Catalyst Dependant Hydroaminoalkylation of Norbornene with *N,N*-dimethylbutylamine**

| Entry <sup>a</sup> | Catalyst                                                                                                  | Co-catalyst                                               | Yield, % <sup>b</sup> |
|--------------------|-----------------------------------------------------------------------------------------------------------|-----------------------------------------------------------|-----------------------|
| 1                  | $[(\text{C}_5\text{Me}_4\text{SiMe}_3)\text{Sc}(\text{CH}_2\text{C}_6\text{H}_4\text{NMe}_2\text{-}o)_2]$ | $[\text{Ph}_3\text{C}][\text{B}(\text{C}_6\text{F}_5)_4]$ | 90                    |
| 2                  | $[(\text{C}_5\text{H}_5)\text{Sc}(\text{CH}_2\text{C}_6\text{H}_4\text{NMe}_2\text{-}o)_2]$               | $[\text{Ph}_3\text{C}][\text{B}(\text{C}_6\text{F}_5)_4]$ | 52                    |
| 3                  | $[\text{Y}(\text{CH}_2\text{C}_6\text{H}_4\text{NMe}_2\text{-}o)_3]$                                      | $[\text{Ph}_3\text{C}][\text{B}(\text{C}_6\text{F}_5)_4]$ | 0                     |
| 4                  | $[\text{Lu}(\text{CH}_2\text{C}_6\text{H}_4\text{NMe}_2\text{-}o)_3]$                                     | $[\text{Ph}_3\text{C}][\text{B}(\text{C}_6\text{F}_5)_4]$ | 0                     |
| 5                  | $[\text{Gd}(\text{CH}_2\text{C}_6\text{H}_4\text{NMe}_2\text{-}o)_3]$                                     | $[\text{Ph}_3\text{C}][\text{B}(\text{C}_6\text{F}_5)_4]$ | 0                     |
| 6                  | $[\text{Sm}(\text{CH}_2\text{C}_6\text{H}_4\text{NMe}_2\text{-}o)_3]$                                     | $[\text{Ph}_3\text{C}][\text{B}(\text{C}_6\text{F}_5)_4]$ | 0                     |
| 7                  | $[\text{Sc}(\text{CH}_2\text{C}_6\text{H}_4\text{NMe}_2\text{-}o)_3]$                                     | N/A                                                       | 0                     |
| 8                  | N/A                                                                                                       | $[\text{Ph}_3\text{C}][\text{B}(\text{C}_6\text{F}_5)_4]$ | 0                     |
| 9 <sup>c</sup>     | $[\text{Sc}(\text{CH}_2\text{C}_6\text{H}_4\text{NMe}_2\text{-}o)_3]$                                     | $[\text{Ph}_3\text{C}][\text{B}(\text{C}_6\text{F}_5)_4]$ | <5                    |

<sup>a</sup> Reactions were carried out with 0.25 mmol amine and 0.275 mmol norbornene in 1 mL of  $\text{C}_6\text{D}_6$ . <sup>b</sup> NMR yield calculated against  $\text{Cp}_2\text{Fe}$  as an internal standard.

<sup>c</sup> 10 mol%  $[\text{Ph}_3\text{C}][\text{B}(\text{C}_6\text{F}_5)_4]$  used.

### 3. Typical Procedure for the Catalytic Alkylation of Amines with Olefins

In a glovebox, [Sc(CH<sub>2</sub>C<sub>6</sub>H<sub>4</sub>NMe<sub>2</sub>-*o*)<sub>3</sub>] (22 mg, 0.05 mmol) was dissolved in toluene (2.0 mL). To this solution *N*-methylpiperidine (99 mg, 1 mmol), styrene (115 mg, 1.1 mmol) and [Ph<sub>3</sub>C][B(C<sub>6</sub>F<sub>5</sub>)<sub>4</sub>] (46 mg, 0.05 mmol) were added sequentially. The biphasic mixture was transferred to a Schlenk ampoule, sealed and heated at 70 °C for 24 hours. EtOAc (5 mL) was added to the crude mixture and the volatiles removed *in vacuo*. The compound was purified by silica gel column chromatography (hexane/EtOAc), to afford **4a** as colourless oil (173 mg, 0.851 mmol, 85 % yield).

### 4. Analytical Data

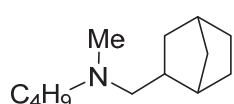

**3a:** <sup>1</sup>H NMR (500 MHz, C<sub>6</sub>D<sub>6</sub>): δ 2.30 – 2.25 (m, 2H), 2.22 (br, 1H), 2.16 (br, 1H), 2.16 – 2.12 (m, 1H), 2.14 (s, 3H), 1.94 (dd, *J* = 7.5 Hz, 4.5 Hz, 1H), 1.64 – 1.58 (m, 1H), 1.52 – 1.40 (m, 4H), 1.37 – 1.27 (m, 4H), 1.18 – 1.13 (m, 1H), 1.05 (d, *J* = 9.5 Hz, 1H), 0.91 (t, *J* = 7.0 Hz, 3H). <sup>13</sup>C NMR (125 MHz, C<sub>6</sub>D<sub>6</sub>): δ 64.3, 58.3, 42.7, 40.7, 39.9, 36.9, 36.5, 35.6, 30.5, 30.2, 29.5, 20.9, 14.3. HR MS (ESI<sup>+</sup>): Found 196.2066 [M+H]<sup>+</sup>, calcd. for C<sub>13</sub>H<sub>26</sub>N<sup>+</sup> 196.2065.

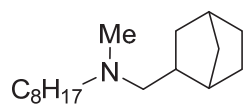

**3b:** <sup>1</sup>H NMR (500 MHz, C<sub>6</sub>D<sub>6</sub>): δ 2.32 – 2.27 (m, 2H), 2.23 (br, 1H), 2.18 – 2.14 (m, 2H), 2.16 (s, 3H), 1.96 (dd, *J* = 7.0 Hz, 5.0 Hz, 1H), 1.66 – 1.60 (m, 1H), 1.50 – 1.45 (m, 4H), 1.38 – 1.25 (br m, 12H), 1.18 – 1.13 (m, 3H), 1.05 (d, *J* = 9.5 Hz, 1H), 0.90 (t, *J* = 8.0 Hz, 3H). <sup>13</sup>C NMR (125 MHz, C<sub>6</sub>D<sub>6</sub>): δ 64.3, 58.7, 42.7, 40.7, 39.9, 37.0, 36.5, 35.6, 32.4, 30.5, 30.1, 29.9, 29.5, 28.1, 27.9, 23.1, 14.4. HR MS (ESI<sup>+</sup>): Found 252.2692 [M+H]<sup>+</sup>, calcd. for C<sub>17</sub>H<sub>34</sub>N<sup>+</sup> 252.2691.

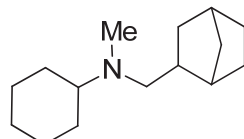

**3c:** <sup>1</sup>H NMR (500 MHz, C<sub>6</sub>D<sub>6</sub>): δ 2.35 – 2.17 (m, 4H), 2.21 (s, 3H), 2.05 (dd, *J* = 12.3 Hz, 7.2 Hz, 1H), 1.81 – 1.67 (m, 4H), 1.66 – 1.58 (m, 1H), 1.58 – 1.44 (m, 3H), 1.40 – 1.33 (m, 1H), 1.32 – 1.27 (m, 1H), 1.23 – 1.10 (m, 7H), 1.06 (d, *J* = 9.7 Hz, 1H), 1.04 – 0.96 (m, 1H). <sup>13</sup>C NMR (125 MHz, C<sub>6</sub>D<sub>6</sub>): δ 63.7, 59.7, 41.1, 39.9, 38.1, 37.0, 36.3, 35.6, 30.5, 29.6, 29.1, 28.9, 26.9, 26.5. HR MS (ESI<sup>+</sup>): Found 222.2221 [M+H]<sup>+</sup>, calcd. for C<sub>15</sub>H<sub>28</sub>N<sup>+</sup> 222.2222.

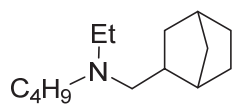

**3d:** <sup>1</sup>H NMR (500 MHz, C<sub>6</sub>D<sub>6</sub>): δ 2.50 – 2.31 (m, 4H), 2.24 (br, 1H), 2.21 – 2.17 (m, 2H), 2.03 (dd, *J* = 12.5 Hz, 7.1 Hz, 1H), 1.65 – 1.58 (m, 1H), 1.55 – 1.27 (m, 8H), 1.20 – 1.12 (m, 3H), 1.06 (d, *J* = 9.7 Hz, 1H), 0.98 (t, *J* = 7.1 Hz, 3H), 0.92 (t, *J* = 7.2 Hz, 3H). <sup>13</sup>C NMR (125 MHz, C<sub>6</sub>D<sub>6</sub>): δ 60.3, 54.0, 48.2, 41.0, 39.9, 36.9, 36.5, 35.6, 30.5, 30.2, 29.5, 21.0, 14.4, 12.4. HR MS (ESI<sup>+</sup>): Found: 210.2222 [M+H]<sup>+</sup>, calcd. for C<sub>14</sub>H<sub>28</sub>N<sup>+</sup> 210.2222.

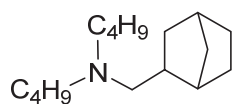

**3e:** <sup>1</sup>H NMR (500 MHz, C<sub>6</sub>D<sub>6</sub>): δ 2.44 – 2.31 (m, 4H), 2.26 (br, 1H), 2.23 – 2.18 (m, 2H), 2.04 (dd, *J* = 12.5 Hz, 7.0 Hz, 1H), 1.67 – 1.60 (m, 1H), 1.56 – 1.41 (m, 6H), 1.39 – 1.29 (m, 6H), 1.21 – 1.11 (m, 3H), 1.06 (d, *J* = 9.7 Hz, 1H), 0.92 (t, *J* = 7.2 Hz, 6H). <sup>13</sup>C NMR (125 MHz, C<sub>6</sub>D<sub>6</sub>): δ 61.0, 54.7, 41.0, 39.9, 36.9, 36.5, 35.5, 30.5, 30.2, 29.5, 21.0, 14.4. HR MS (ESI<sup>+</sup>): Found 238.2536 [M+H]<sup>+</sup>, calcd. for C<sub>16</sub>H<sub>32</sub>N<sup>+</sup> 238.2535.

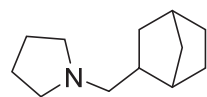

**3f:** <sup>1</sup>H NMR (400 MHz, C<sub>6</sub>D<sub>6</sub>): δ 2.46 - 2.36 (m, 4H), 2.32 (dd, *J* = 11.6 Hz, 8.8 Hz, 1H), 2.28 (br, 1H), 2.17 (br, 1H), 2.07 (dd, *J* = 11.6 Hz, 7.3 Hz, 1H), 1.67 – 1.60 (m, 5H), 1.51 – 1.44 (m, 2H), 1.41 – 1.35 (m, 1H), 1.30 (ddt, *J* = 9.7 Hz, 3.8 Hz, 1.9 Hz, 1H),

1.22 – 1.10 (m, 3H), 1.07 – 1.03 (m, 1H).  $^{13}\text{C}$  NMR (100 MHz,  $\text{C}_6\text{D}_6$ ):  $\delta$  62.6, 54.6, 41.9, 39.9, 36.9, 36.7, 35.6, 30.5, 29.5, 24.0. HR MS (ESI+): Found 180.1755  $[\text{M}+\text{H}]^+$ , calcd. for  $\text{C}_{12}\text{H}_{22}\text{N}^+$  180.1752.

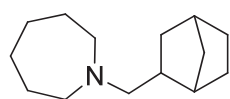

**3g:**  $^1\text{H}$  NMR (500 MHz,  $\text{C}_6\text{D}_6$ ):  $\delta$  2.55 (br, 4H), 2.27 (dd,  $J = 12.1$  Hz, 8.5 Hz, 1H), 2.21 – 2.18 (m, 2H), 2.11 (dd,  $J = 12.1$  Hz, 7.4 Hz, 1H), 1.57 (br, 9H), 1.51 – 1.44 (m, 2H), 1.37 – 1.30 (m, 1H), 1.28 (d,  $J = 9.5$  Hz, 1H), 1.15 (br, 3H), 1.05 (d,  $J = 9.4$  Hz, 1H).  $^{13}\text{C}$  NMR (125 MHz,  $\text{C}_6\text{D}_6$ ):  $\delta$  64.5, 56.0, 41.3, 39.9, 37.0, 36.4, 35.7, 30.5, 29.5, 29.3, 27.6. HR MS (ESI+): Found: 208.2066  $[\text{M}+\text{H}]^+$ , calcd. for  $\text{C}_{14}\text{H}_{26}\text{N}^+$  208.2065.

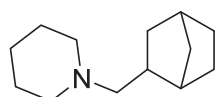

**3h:**  $^1\text{H}$  NMR (500 MHz,  $\text{C}_6\text{D}_6$ ):  $\delta$  2.30 (br, 4H), 2.21 (br, 1H), 2.16 (br, 1H), 2.12 (dd,  $J = 12.2$  Hz, 8.6 Hz, 1H), 1.93 (dd,  $J = 12.1$  Hz, 7.4 Hz, 1H), 1.66 – 1.61 (m, 1H), 1.56 (s, 2H), 1.56 – 1.51 (m, 4H), 1.48 – 1.44 (m, 1H), 1.35 – 1.27 (m, 4H), 1.18 – 1.10 (m, 3H), 1.03 (d,  $J = 9.7$  Hz, 1H).  $^{13}\text{C}$  NMR (125 MHz,  $\text{C}_6\text{D}_6$ ):  $\delta$  65.8, 55.4, 40.0, 37.0, 36.6, 35.6, 30.5, 30.1, 29.5, 26.7, 25.2. HR MS (ESI+): Found 194.1904  $[\text{M}+\text{H}]^+$ , calcd. for  $\text{C}_{13}\text{H}_{24}\text{N}^+$  194.1909.

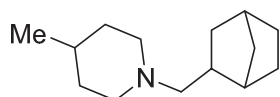

**3i:**  $^1\text{H}$  NMR (500 MHz,  $\text{C}_6\text{D}_6$ ):  $\delta$  2.80 – 2.73 (m, 2H), 2.22 (d,  $J = 9.0$  Hz, 1H), 2.17 – 2.12 (m, 2H), 1.99 – 1.91 (m, 1H), 1.77 (m, 1H), 1.71 – 1.63 (m, 2H), 1.61 – 1.42 (m, 7H), 1.40 – 1.27 (m, 2H), 1.20 – 1.10 (m, 3H), 1.05 (d,  $J = 9.7$  Hz, 1H), 0.83 (d,  $J = 6.6$  Hz, 3H).  $^{13}\text{C}$  NMR (125 MHz,  $\text{C}_6\text{D}_6$ ):  $\delta$  65.5 (x2), 63.2, 62.8, 55.0, 54.6, 40.1, 40.0 (x3), 37.0, 36.6 (x2), 35.6 (x2), 33.7, 31.6, 31.5, 30.5, 29.5, 26.1, 20.0. HR MS (ESI+): Found 208.2065  $[\text{M}+\text{H}]^+$ , calcd. for  $\text{C}_{14}\text{H}_{26}\text{N}^+$  208.2065.

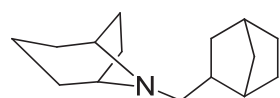

**3j:**  $^1\text{H}$  NMR (500 MHz,  $\text{C}_6\text{D}_6$ ):  $\delta$  3.06 (s, 2H), 2.32 (s, 1H), 2.20 (s, 1H), 2.11 (dd,  $J = 12.1$  Hz, 8.5 Hz, 1H), 1.99 (dd,  $J = 12.1$  Hz, 7.2 Hz, 1H), 1.85 – 1.78 (m, 4H), 1.58 – 1.47 (m, 3H), 1.44 – 1.35 (m, 5H), 1.32 – 1.30 (m, 1H), 1.22 – 1.13 (m, 5H), 1.07 (d,  $J = 9.1$  Hz, 1H).  $^{13}\text{C}$  NMR (125 MHz,  $\text{C}_6\text{D}_6$ ):  $\delta$  57.9, 57.8, 56.7, 39.5, 37.4, 34.5, 34., 33., 29.1, 29.0, 28.1, 27.1, 24.5, 24.3, 15.0. HR MS (ESI+): Found 220.2065  $[\text{M}+\text{H}]^+$ , calcd. for  $\text{C}_{15}\text{H}_{25}\text{N}^+$  220.2065.

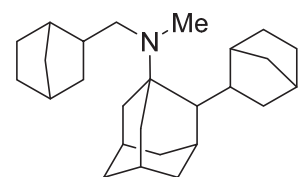

**3k:**  $^1\text{H}$  NMR (500 MHz,  $\text{C}_6\text{D}_6$ ):  $\delta$  2.72 (d,  $J = 3.9$  Hz, 1H), 2.53 (t,  $J = 12.5$  Hz, 1H), 2.25 (s, 3H), 2.22 – 2.17 (m, 4H), 2.00 (br, 3H), 1.77 (d,  $J = 11.7$  Hz, 3H), 1.73 – 1.71 (m, 1H), 1.67 (d,  $J = 11.7$  Hz, 3H), 1.61 – 1.45 (m, 12H), 1.43 – 1.40 (m, 1H), 1.35 – 1.17 (m, 5H), 1.15 (d,  $J = 7.5$  Hz, 2H), 1.01 (d,  $J = 9.5$  Hz, 2H).  $^{13}\text{C}$  NMR (125 MHz,  $\text{C}_6\text{D}_6$ ):  $\delta$  54.0, 52.8, 49.3, 46.0, 43.5, 41.8, 41.4, 41.3, 40.4, 39.3, 37.5, 37.3, 35.4, 34.5, 33.3, 31.8, 30.6, 30.2, 29.7 (x2). HR MS (ESI+): Found 368.3317  $[\text{M}+\text{H}]^+$ , calcd. for  $\text{C}_{26}\text{H}_{42}\text{N}^+$  368.3317.

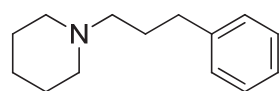

**4a:**  $^1\text{H}$  NMR (500 MHz,  $\text{C}_6\text{D}_6$ ):  $\delta$  7.19 – 7.16 (m, 2H), 7.12 (d,  $J = 7.6$  Hz, 2H), 7.08 (t,  $J = 7.6$  Hz, 1H), 2.58 (t,  $J = 7.7$  Hz, 2H), 2.25 (br, 4H), 2.20 (t,  $J = 7.1$  Hz, 2H), 1.73 (quin,  $J = 7.5$  Hz, 2H), 1.52 (quin,  $J = 5.5$  Hz, 4H), 1.33 (br, 2H).  $^{13}\text{C}$  NMR (125 MHz,  $\text{C}_6\text{D}_6$ ):  $\delta$  142.9, 128.9, 128.6, 126.0, 58.6, 54.9, 33.3, 29.3, 26.6, 25.1. HR MS (ESI+): Found 204.1753  $[\text{M}+\text{H}]^+$ , calcd. for  $\text{C}_{14}\text{H}_{21}\text{N}^+$  204.1752.

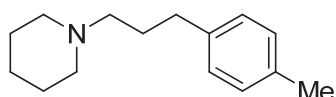

**4b:**  $^1\text{H}$  NMR (500 MHz,  $\text{C}_6\text{D}_6$ ):  $\delta$  7.07 (d,  $J = 7.7$  Hz, 2H), 7.02 (d,  $J = 7.7$  Hz, 2H), 2.60 (t,  $J = 7.6$  Hz, 2H), 2.27 (br, 4H), 2.23 (t,  $J = 7.2$  Hz, 2H), 2.16 (s, 3H), 1.76 (quin,  $J = 7.5$  Hz, 2H), 1.53 (quin,  $J = 6.0$  Hz, 4H), 1.33 (br,

2H).  $^{13}\text{C}$  NMR (125 MHz,  $\text{C}_6\text{D}_6$ ):  $\delta$  139.9, 135.1, 129.3, 128.8, 58.7, 55.0, 33.5, 29.4, 26.7, 25.2, 21.1. HR MS (ESI+): Found 218.1906  $[\text{M}+\text{H}]^+$ , calcd. for  $\text{C}_{15}\text{H}_{24}\text{N}^+$  218.1909.

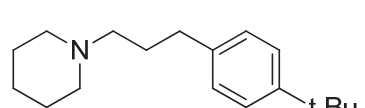

**4c:**  $^1\text{H}$  NMR (500 MHz,  $\text{C}_6\text{D}_6$ ):  $\delta$  7.28 (d,  $J = 8.1$  Hz, 2H), 7.14 (d,  $J = 8.1$  Hz, 2H), 2.63 (t,  $J = 7.6$  Hz, 2H), 2.27 (br, 4H), 2.24 (t,  $J = 7.0$  Hz, 2H), 1.78 (quin,  $J = 7.5$  Hz, 2H), 1.53 (quin,  $J = 5.5$  Hz, 4H), 1.33 (m, 2H), 1.26 (s, 9H).  $^{13}\text{C}$  NMR (125 MHz,  $\text{C}_6\text{D}_6$ ):  $\delta$  148.1, 139.5, 128.2, 125.1, 58.4, 54.6, 34.0, 33.1, 31.2, 29.0, 26.3, 24.8. HR MS (ESI+): Found 260.2373  $[\text{M}+\text{H}]^+$ , calcd. for  $\text{C}_{18}\text{H}_{30}\text{N}^+$  260.2373.

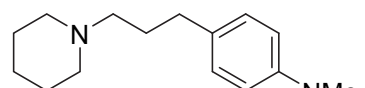

**4d:**  $^1\text{H}$  NMR (500 MHz,  $\text{C}_6\text{D}_6$ ):  $\delta$  7.15 (d,  $J = 8.3$  Hz, 2H), 6.67 (d,  $J = 8.5$  Hz, 2H), 2.65 (t,  $J = 7.5$  Hz, 2H), 2.56 (s, 6H), 2.31 – 2.28 (m, 6H), 1.83 (quin,  $J = 7.5$  Hz, 2H), 1.54 (quin,  $J = 6.0$  Hz, 4H), 1.34 (br, 2H).  $^{13}\text{C}$  NMR (125 MHz,  $\text{C}_6\text{D}_6$ ):  $\delta$  149.5, 131.1, 129.4, 113.5, 55.8, 55.0, 40.7, 33.1, 29.8, 26.7, 25.2. HR MS (ESI+): Found 247.2177  $[\text{M}+\text{H}]^+$ , calcd. for  $\text{C}_{16}\text{H}_{27}\text{N}_2^+$  247.2174.

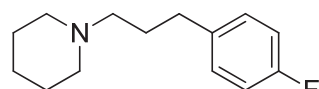

**4e:**  $^1\text{H}$  NMR (500 MHz,  $\text{C}_6\text{D}_6$ ):  $\delta$  6.87 – 6.80 (m, 4H), 2.45 (t,  $J = 7.6$  Hz, 2H), 2.24 (br, 4H), 2.14 (t,  $J = 7.0$  Hz, 2H), 1.62 (quin,  $J = 7.5$  Hz, 2H), 1.52 (quin,  $J = 5.5$  Hz, 4H), 1.3 (br, 2H).  $^{13}\text{C}$  NMR (125 MHz,  $\text{C}_6\text{D}_6$ ):  $\delta$  159.8 ( $J = 242.8$  Hz), 136.5 ( $J = 3.2$  Hz), 128.2 ( $J = 7.7$  Hz), 113.3 ( $J = 21.0$  Hz), 56.4, 53.0, 31.0, 27.3, 24.7, 23.2. HR MS (ESI+): Found 222.1657  $[\text{M}+\text{H}]^+$ , calcd. for  $\text{C}_{14}\text{H}_{21}\text{FN}^+$  222.1658.

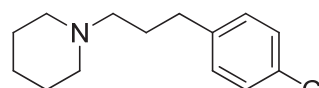

**4f:**  $^1\text{H}$  NMR (500 MHz,  $\text{C}_6\text{D}_6$ ):  $\delta$  7.12 (d,  $J = 8.3$  Hz, 2H), 6.79 (d,  $J = 8.3$  Hz, 2H), 2.40 (t,  $J = 7.6$  Hz, 2H), 2.23 (br, 4H), 2.12 (t,  $J = 7.0$  Hz, 2H), 1.58 (quin,  $J = 7.5$  Hz, 2H), 1.52 (quin,  $J = 5.5$  Hz, 4H), 1.33 (br, 2H).  $^{13}\text{C}$  NMR (125 MHz,  $\text{C}_6\text{D}_6$ ):  $\delta$  141.3, 131.8, 130.2, 128.7, 58.3, 54.9, 37.0, 29.0, 26.6, 25.1. HR MS (ESI+): Found 238.1357  $[\text{M}+\text{H}]^+$ , calcd. for  $\text{C}_{14}\text{H}_{21}\text{ClN}^+$  238.1363.

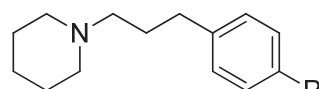

**4g:**  $^1\text{H}$  NMR (500 MHz,  $\text{C}_6\text{D}_6$ ):  $\delta$  7.52 (d,  $J = 7.2$  Hz, 2H), 7.47 (d,  $J = 8.1$  Hz, 2H), 7.23 (t,  $J = 7.6$  Hz, 2H), 7.17 – 7.12 (m, 3H), 2.62 (t,  $J = 7.6$  Hz, 2H), 2.28 (br, 4H), 2.24 (t,  $J = 7.1$  Hz, 2H), 1.77 (quin,  $J = 7.0$  Hz, 2H), 1.54 (quin,  $J = 5.5$  Hz, 4H), 1.34 (br, 2H).  $^{13}\text{C}$  NMR (125 MHz,  $\text{C}_6\text{D}_6$ ):  $\delta$  142.0, 141.8, 139.2, 129.3, 129.0, 127.4 (x2), 127.2, 58.6, 55.0, 33.5, 29.3, 26.7, 25.2. HR MS (ESI+): Found 280.2060  $[\text{M}+\text{H}]^+$ , calcd. for  $\text{C}_{20}\text{H}_{26}\text{N}^+$  280.2065.

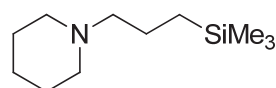

**4h:**  $^1\text{H}$  NMR (500 MHz,  $\text{C}_6\text{D}_6$ ):  $\delta$  2.34 (br, 4H), 2.27 (t,  $J = 7.5$  Hz, 2H), 1.58 – 1.50 (m, 6H), 1.35 (br, 2H), 0.53 – 0.49 (m, 2H), 0.01 (s, 9H).  $^{13}\text{C}$  NMR (125 MHz,  $\text{C}_6\text{D}_6$ ):  $\delta$  63.2, 55.1, 26.7, 25.2, 22.1, 14.5. HR MS (ESI+): Found 200.1834  $[\text{M}+\text{H}]^+$ , calcd. for  $\text{C}_{11}\text{H}_{26}\text{NSi}^+$  200.1835.

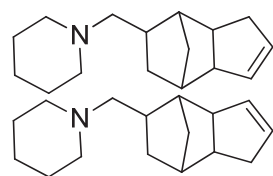

**5a:**  $^1\text{H}$  NMR (500 MHz,  $\text{C}_6\text{D}_6$ ):  $\delta$  5.64 – 5.59 (m, 1H), 5.53 – 5.51 (m, 1H), 3.01 – 2.95 (m, 1H), 2.48 – 2.41 (m, 1H), 2.38 – 2.23 (br m, 5H), 2.21 – 2.12 (m, 3H), 2.10 (dd,  $J = 7.9$  Hz, 4.0 Hz, 1H), 2.01 – 1.90 (m, 1H), 1.84 – 1.77 (m, 1H), 1.56 – 1.51 (m, 5H), 1.43 (d,  $J = 9.6$  Hz, 1H), 1.36 – 1.25 (m, 3H), 0.931 (dtd,  $J = 12.0$  Hz, 5.5 Hz, 1.5 Hz, 1H). **5a'**  $\delta$  5.64 – 5.59 (m, 1H), 5.53 – 5.51 (m, 1H), 3.08 – 3.02 (m, 1H), 2.48 – 2.41 (m, 1H), 2.38 – 2.23 (br m, 5H), 2.21 – 2.12 (m, 3H), 2.08 – 2.06 (br, 1H), 2.01 – 1.90 (m, 2H), 1.56 – 1.51 (m, 6H), 1.36 – 1.25 (m, 3H), 1.01 (dtd,  $J = 12.9$  Hz, 4.4 Hz, 1.7 Hz, 1H);  $^{13}\text{C}$  NMR (125 MHz,  $\text{C}_6\text{D}_6$ ): **5a**  $\delta$  132.9, 130.7, 65.9, 55.3, 53.1, 44.7, 42.9, 40.4, 38.7, 32.5, 32.2,

31.3, 26.7, 25.2. **5a'**  $\delta$  132.7, 131.4, 65.6, 55.4, 54.1, 43.1, 42.5, 41.5, 38.8, 34.3, 32.7, 29.0, 26.7, 25.2; HR MS (ESI+): Found 232.2070 [M+H]<sup>+</sup>, calcd. for C<sub>16</sub>H<sub>26</sub>N<sup>+</sup> 232.2065.

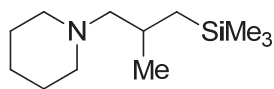

**5b:** <sup>1</sup>H NMR (500 MHz, C<sub>6</sub>D<sub>6</sub>):  $\delta$  2.30 (br, 4H), 2.04 (ddd, *J* = 28.9 Hz, 12.0 Hz, 7.3 Hz, 2H), 1.81 (td, *J* = 13.7 Hz, 6.8 Hz, 1H), 1.53 (quin, *J* = 6.0 Hz, 4H), 1.34 (br, 2H), 1.02 (d, *J* = 6.5 Hz, 3H), 0.84 (dd, *J* = 14.7 Hz, 4.5 Hz, 1H), 0.36 – 0.28 (m, 1H), 0.07 (s, 9H). <sup>13</sup>C NMR (125 MHz, C<sub>6</sub>D<sub>6</sub>):  $\delta$  69.8, 55.5, 27.6, 26.7, 25.1, 23.3, 21.8, -0.37. HR MS (ESI+): Found 214.1987 [M+H]<sup>+</sup>, calcd. for C<sub>12</sub>H<sub>28</sub>NSi<sup>+</sup> 214.1991.

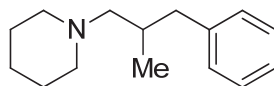

**5c:** <sup>1</sup>H NMR (500 MHz, C<sub>6</sub>D<sub>6</sub>):  $\delta$  7.19 (t, *J* = 7.4 Hz, 2H), 7.13 – 7.08 (m, 3H), 2.84 (dd, *J* = 13.3 Hz, 4.7 Hz, 1H), 2.31 – 2.26 (br m, 5H), 2.09 (dd, *J* = 12.0 Hz, 7.6 Hz, 1H), 1.99 (dd, *J* = 12.0 Hz, 7.1 Hz, 1H), 1.96 – 1.88 (m, 1H), 1.52 (quin, *J* = 6.0 Hz, 4H), 1.33 (br, 2H), 0.87 (d, *J* = 6.5 Hz, 3H). <sup>13</sup>C NMR (125 MHz, C<sub>6</sub>D<sub>6</sub>):  $\delta$  141.6, 129.7, 128.4 (x2), 126.0, 66.0, 55.3, 41.6, 33.0, 26.7, 25.1, 18.2. HR MS (ESI+): Found 218.1904 [M+H]<sup>+</sup>, calcd. for C<sub>15</sub>H<sub>24</sub>N<sup>+</sup> 218.1909.

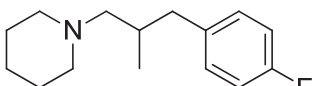

**5d:** <sup>1</sup>H NMR (500 MHz, C<sub>6</sub>D<sub>6</sub>):  $\delta$  6.88 – 6.81 (m, 4H), 2.69 (dd, *J* = 13.4 Hz, 4.7 Hz, 1H), 2.24 (br, 4H), 2.17 (dd, *J* = 13.4 Hz, 8.4 Hz, 1H), 2.02 (dd, *J* = 12.51 Hz, 7.9 Hz, 1H), 1.95 (dd, *J* = 12.2 Hz, 6.9 Hz, 1H), 1.85 – 1.76 (m, 1H), 1.52 (quin, *J* = 5.5 Hz, 4H), 1.33 (br, 2H), 0.80 (d, *J* = 6.6 Hz, 3H). <sup>13</sup>C NMR (125 MHz, C<sub>6</sub>D<sub>6</sub>):  $\delta$  161.8 (d, *J* = 242.9 Hz), 137.1 (d, *J* = 3.2 Hz), 131.0 (d, *J* = 7.6 Hz), 115.1 (d, *J* = 20.9 Hz), 65.8, 55.3, 40.5, 32.9, 26.6, 25.1, 18.0. HR MS (ESI+): Found 236.1817 [M+H]<sup>+</sup>, calcd. for C<sub>15</sub>H<sub>23</sub>FN<sup>+</sup> 236.1815.

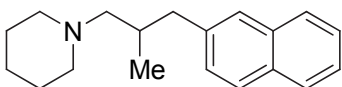

**5e:** <sup>1</sup>H NMR (500 MHz, C<sub>6</sub>D<sub>6</sub>):  $\delta$  8.29 (d, *J* = 8.5 Hz, 1H), 7.72 (d, *J* = 8.2 Hz, 1H), 7.61 (d, *J* = 8.1 Hz, 1H), 7.41 (t, *J* = 7.6 Hz, 1H), 7.33 – 7.27 (m, 2H), 7.23 (d, *J* = 6.9 Hz, 1H), 3.60 (dd, *J* = 13.5 Hz, 8.5 Hz, 1H), 2.46 (dd, *J* = 13.5 Hz, 8.9 Hz, 1H), 2.35 (br, 2H), 2.24 (br, 2H), 2.17 – 1.98 (m, 3H), 1.56 (quin, *J* = 5.5 Hz, 4H), 1.35 (br, 2H), 0.85 (d, *J* = 6.4 Hz, 3H). <sup>13</sup>C NMR (125 MHz, C<sub>6</sub>D<sub>6</sub>):  $\delta$  138.4, 134.8, 133.0, 129.2, 127.5, 127.0, 125.8, 125.6 (x2), 124.9, 67.0, 55.7, 39.3, 32.8, 26.7, 25.1, 18.7. HR MS (ESI+): Found 268.2063 [M+H]<sup>+</sup>, calcd. for C<sub>19</sub>H<sub>26</sub>N<sup>+</sup> 268.2065.

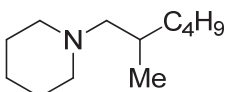

**5f:** <sup>1</sup>H NMR (500 MHz, C<sub>6</sub>D<sub>6</sub>):  $\delta$  2.29 (br, 4H), 2.10 (dd, *J* = 12.1 Hz, 6.7 Hz, 1H), 2.00 (dd, *J* = 12.1 Hz, 7.9 Hz, 1H), 1.68 – 1.59 (m, 1H), 1.54 (quin, *J* = 5.5 Hz, 4H), 1.51 – 1.45 (m, 1H), 1.38 – 1.22 (m, 6H), 1.12 – 1.05 (m, 1H), 0.97 (d, *J* = 6.6 Hz, 3H), 0.92 (t, *J* = 7.0 Hz, 3H). <sup>13</sup>C NMR (125 MHz, C<sub>6</sub>D<sub>6</sub>):  $\delta$  67.0, 55.5, 35.4, 30.9, 29.7, 26.7, 25.2, 23.5, 18.7, 14.4. HR MS (ESI+): Found 184.2064 [M+H]<sup>+</sup>, calcd. for C<sub>12</sub>H<sub>26</sub>N<sup>+</sup> 184.2065.

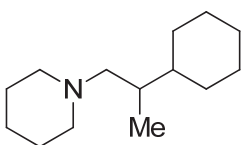

**5g:** <sup>1</sup>H NMR (500 MHz, C<sub>6</sub>D<sub>6</sub>):  $\delta$  2.32 (br m 2H), 2.25 (br, 2H), 2.20 (dd, *J* = 12.1 Hz, 6.2 Hz, 1H), 2.01 (dd, *J* = 12.1 Hz, 8.6 Hz, 1H), 1.75 – 1.72 (m, 2H), 1.68 – 1.65 (m, 1H), 1.60 – 1.51 (m, 7H), 1.36 – 1.31 (m, 3H), 1.27 – 1.20 (m, 2H), 1.17 – 1.08 (m, 2H), 1.06 – 0.97 (m, 1H), 0.94 (d, *J* = 6.8 Hz, 3H). <sup>13</sup>C NMR (125 MHz, C<sub>6</sub>D<sub>6</sub>):  $\delta$  64.4, 55.6, 41.3, 35.8, 31.5, 28.7, 27.4, 27.3, 27.2, 26.7, 25.2, 15.1. HR MS (ESI+): Found 210.2224 [M+H]<sup>+</sup>, calcd. for C<sub>14</sub>H<sub>28</sub>N<sup>+</sup> 210.2222.

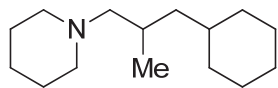

**5h:**  $^1\text{H}$  NMR (500 MHz,  $\text{C}_6\text{D}_6$ ):  $\delta$  2.31 – 2.28 (br, 4H), 2.09 (dd,  $J = 12.0$  Hz, 6.7 Hz, 1H), 2.00 (dd,  $J = 12.0$  Hz, 7.9 Hz, 1H), 1.89 – 1.64 (m, 6H), 1.54 (quin,  $J = 6.0$  Hz, 4H), 1.44 – 1.30 (m, 4H), 1.27 – 1.10 (m, 3H), 0.99 – 0.79 (m, 3H), 0.96 (d,  $J = 6.5$  Hz, 3H).  $^{13}\text{C}$  NMR (125 MHz,  $\text{C}_6\text{D}_6$ ):  $\delta$  67.4, 55.5, 44.0, 35.4, 34.8, 33.5, 27.7, 27.2, 26.9, 26.8, 26.7, 25.2, 19.2. HR MS (ESI+): Found 224.2378  $[\text{M}+\text{H}]^+$ , calcd. for  $\text{C}_{15}\text{H}_{30}\text{N}^+$  224.2378.

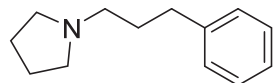

**6a:**  $^1\text{H}$  NMR (500 MHz,  $\text{C}_6\text{D}_6$ ):  $\delta$  7.18 (d,  $J = 7.5$  Hz, 2H), 7.11 (d,  $J = 7.3$  Hz, 2H) 7.08 (t,  $J = 7.3$  Hz, 1H), 2.61 (t,  $J = 7.6$  Hz, 2H), 2.35 – 2.32 (m, 6H), 1.74 (quin,  $J = 7.5$  Hz, 2H), 1.61 – 1.55 (m, 4H).  $^{13}\text{C}$  NMR (125 MHz,  $\text{C}_6\text{D}_6$ ):  $\delta$  142.7, 128.8, 128.7, 126.1, 55.7, 54.2, 33.9, 30.9, 23.9. HR MS (ESI+): Found 190.1599  $[\text{M}+\text{H}]^+$ , calcd. for  $\text{C}_{13}\text{H}_{20}\text{N}^+$  190.1596.



## 5. Kinetic Isotope Effect Experiments

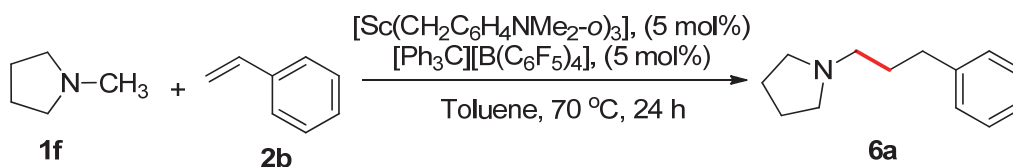

Compound **6a** could be synthesized following the general procedure above in an 81 % isolated yield.

### Intermolecular Competition Experiment

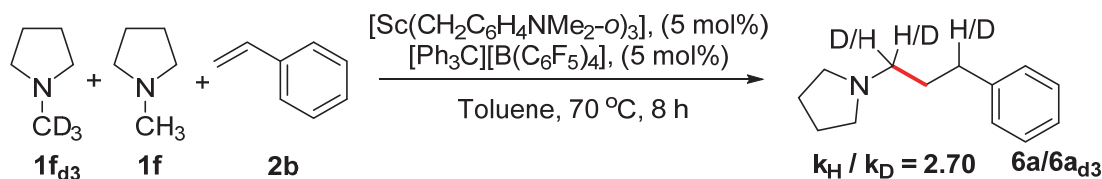

In a glovebox,  $[\text{Sc}(\text{CH}_2\text{C}_6\text{H}_4\text{NMe}_2\text{-o})_3]$  (6 mg, 0.013 mmol) was dissolved in toluene (1.0 mL). To this solution **1fd<sub>3</sub>** (22 mg, 0.25 mmol), **1f** (21 mg, 0.25 mmol), styrene (26 mg, 0.25 mmol) and  $[\text{Ph}_3\text{C}][\text{B}(\text{C}_6\text{F}_5)_4]$  (16 mg, 0.013 mmol) were added sequentially. The biphasic mixture was transferred to a Schlenk ampoule, sealed and heated at 70 °C for 8 hours. EtOAc (5 mL) was added to the crude mixture and the volatiles removed *in vacuo*. The compound was purified by silica gel column chromatography (hexane/EtOAc), to afford a mixture of **6a** and **6ad<sub>3</sub>** as a colorless oil (12 mg, 25 % yield). A  $k_{\text{H}}/k_{\text{D}}$  value of 2.70 was found by comparison of the relative ratios of **6a** and **6ad<sub>3</sub>** by  $^1\text{H}$  NMR spectroscopy using the integration values for the benzylic proton(s). No deuterium scrambling was observed when this mixture of **6a** and **6ad<sub>3</sub>** was exposed to the standard reaction conditions.

Fig. S1. The  $^1\text{H}$  NMR Spectrum of an Isolated Mixture of **6a** and **6ad<sub>3</sub>**

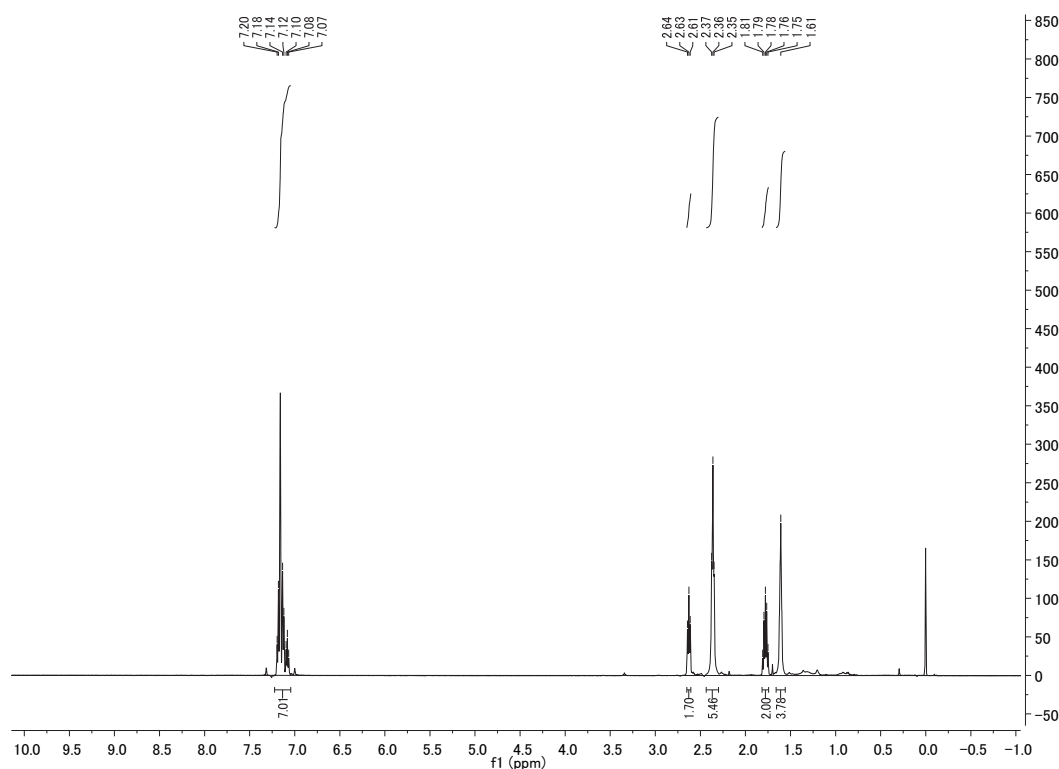

## Comparison of Initial Rates

In a glovebox,  $[\text{Sc}(\text{CH}_2\text{C}_6\text{H}_4\text{NMe}_2\text{-}o)_3]$  (6 mg, 0.013 mmol) was dissolved in  $\text{C}_7\text{D}_8$  (1.0 mL). To this solution, ferrocene (19 mg, 0.1 mmol), *N*-methylpyrrolidine (21 mg, 0.25 mmol), styrene (29 mg, 0.28 mmol) and  $[\text{Ph}_3\text{C}][\text{B}(\text{C}_6\text{F}_5)_4]$  (16 mg, 0.013 mmol) were added sequentially. The biphasic mixture was transferred to a J Young NMR tube, sealed and the reaction monitored by  $^1\text{H}$  NMR at 70 °C for 12 h. The reaction with  $\text{d}_3$ -*N*-methylpyrrolidine was performed and monitored under exactly the same conditions. Initial rates were extracted by comparing the  $^1\text{H}$  NMR integration of the benzylic proton(s) of **6a** and **6a<sub>d3</sub>** against the internal standard. A  $k_{\text{H}}/k_{\text{D}}$  value of  $1.97 \pm 0.03$  was found by comparison of the initial rates of reaction.

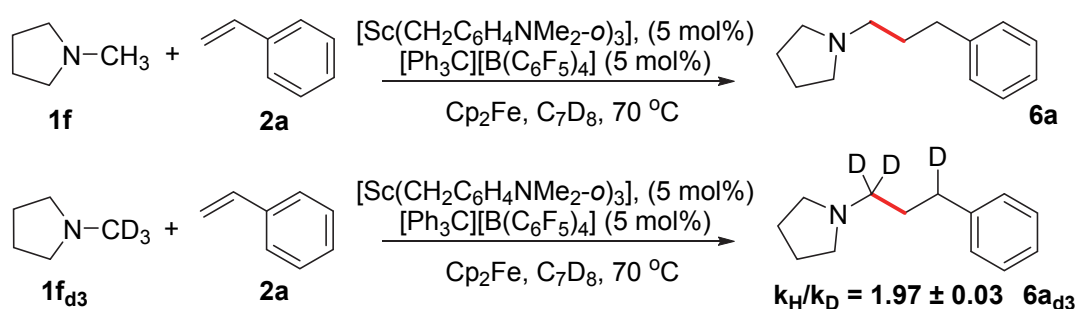

Fig. S2. Initial Rates of C–H/C–D Addition of *N*-methylpyrrolidine to Styrene

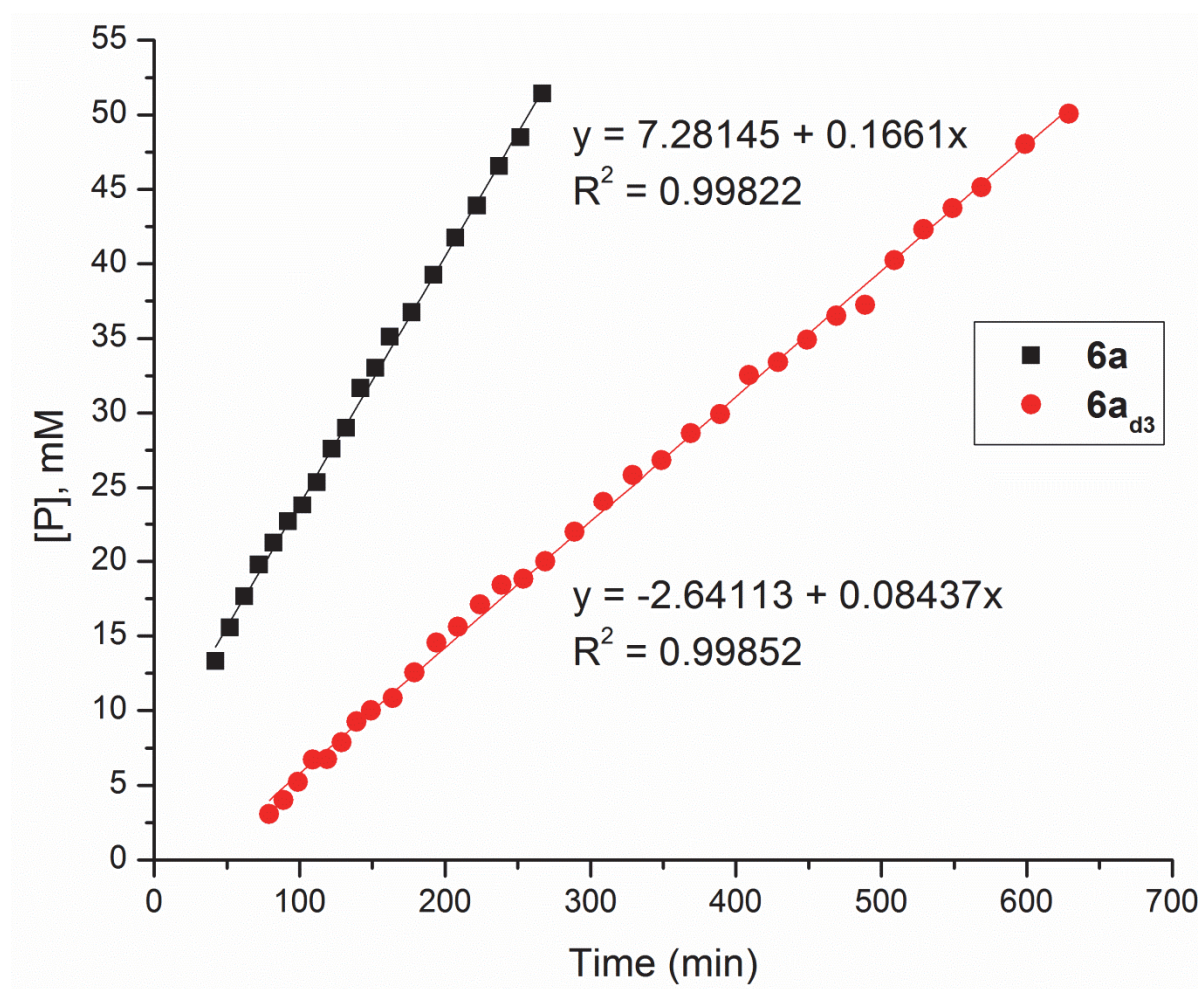

## 6. Dialkylation of 1k to give 3k

Scheme S1. A Plausible Mechanism for the Formation of 3k

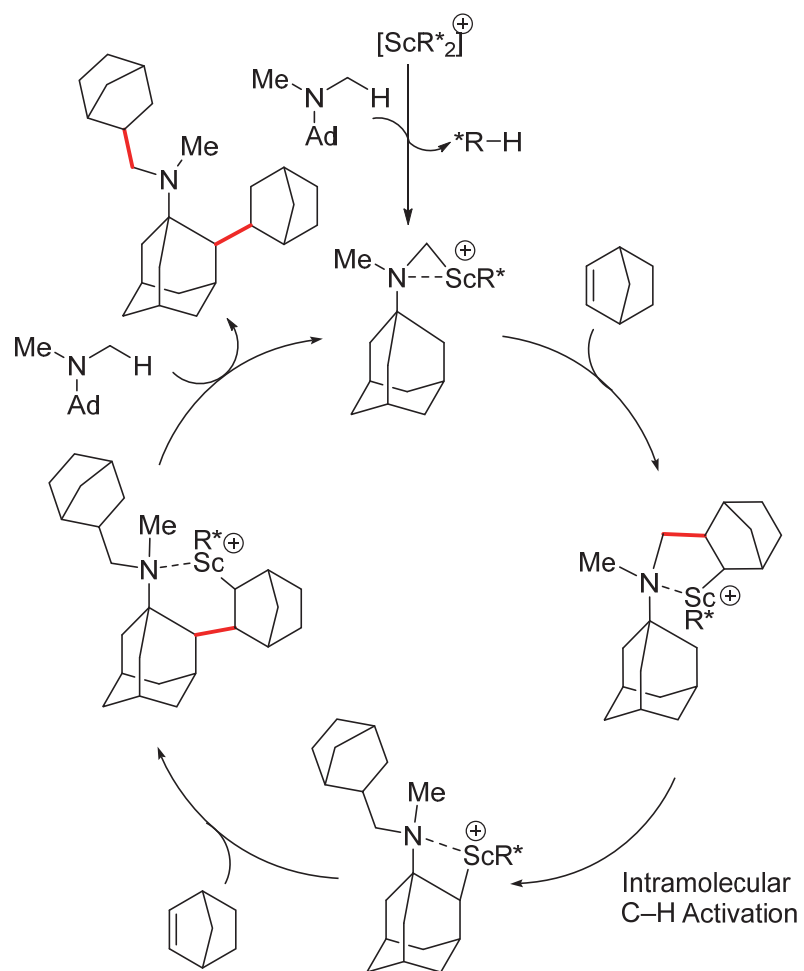

## 7. References

(1) (a) L. E. Manzer, *J. Am. Chem. Soc.*, 1978, **100**, 8068; (b) W. X. Zhang, M. Nishiura, T. Mashiko and Z. Hou, *Chem. Eur. J.*, 2008, **14**, 2167.

(2) X. Li, M. Nishiura, K. Mori, T. Mashiko and Z. Hou, *Chem. Commun.*, 2007, 4137.

(3) R. N. Icke, B. B. Wisegarver, and G. A. Alles *Org. Synth.*, 1945, **25**, 89.

(4) P. Wei, X. Bi, Z. Wu and Z. Xu, *Org. Lett.*, 2005, **7**, 3199.

## 8. <sup>1</sup>H and <sup>13</sup>C NMR spectra of products

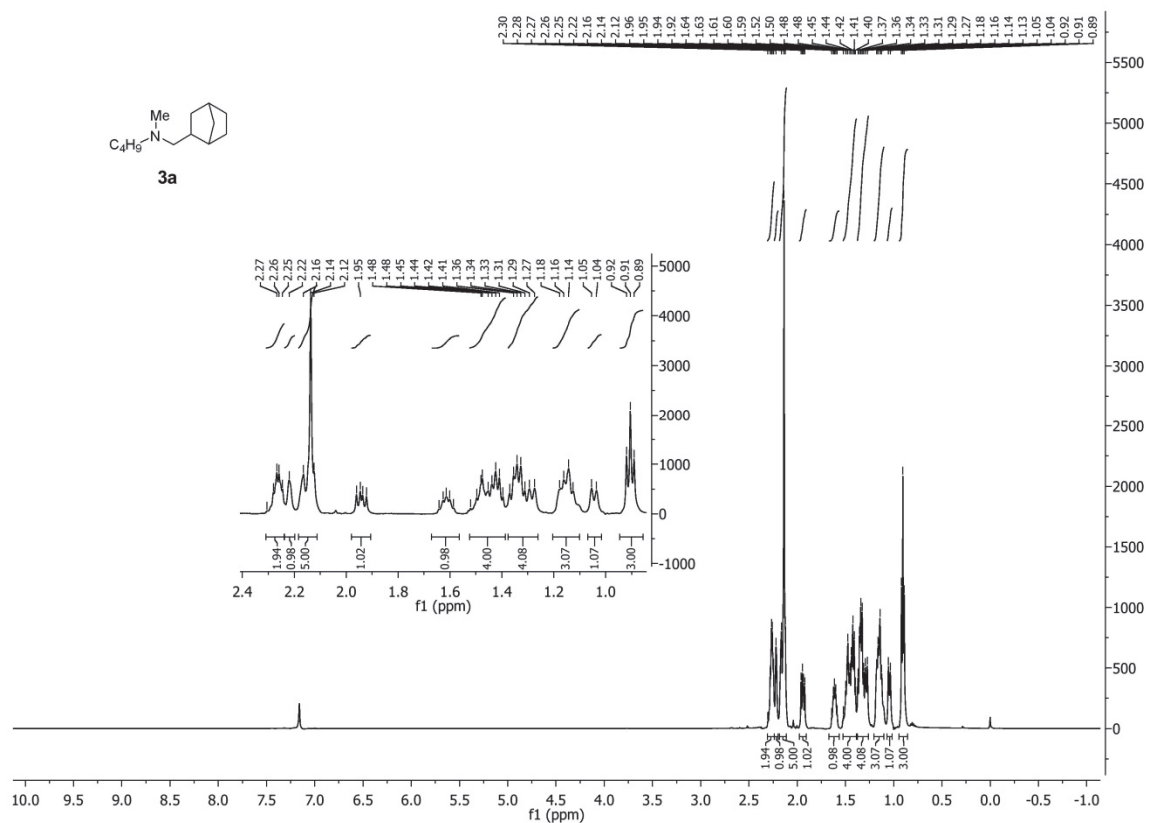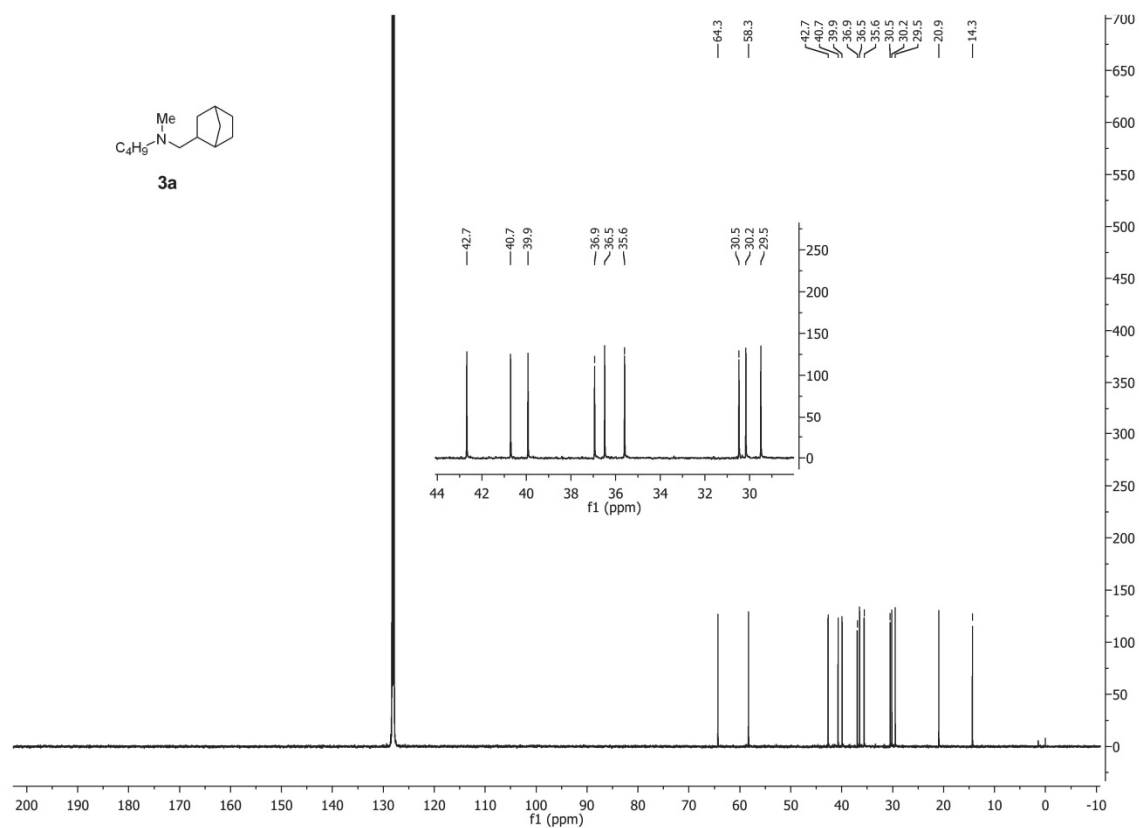

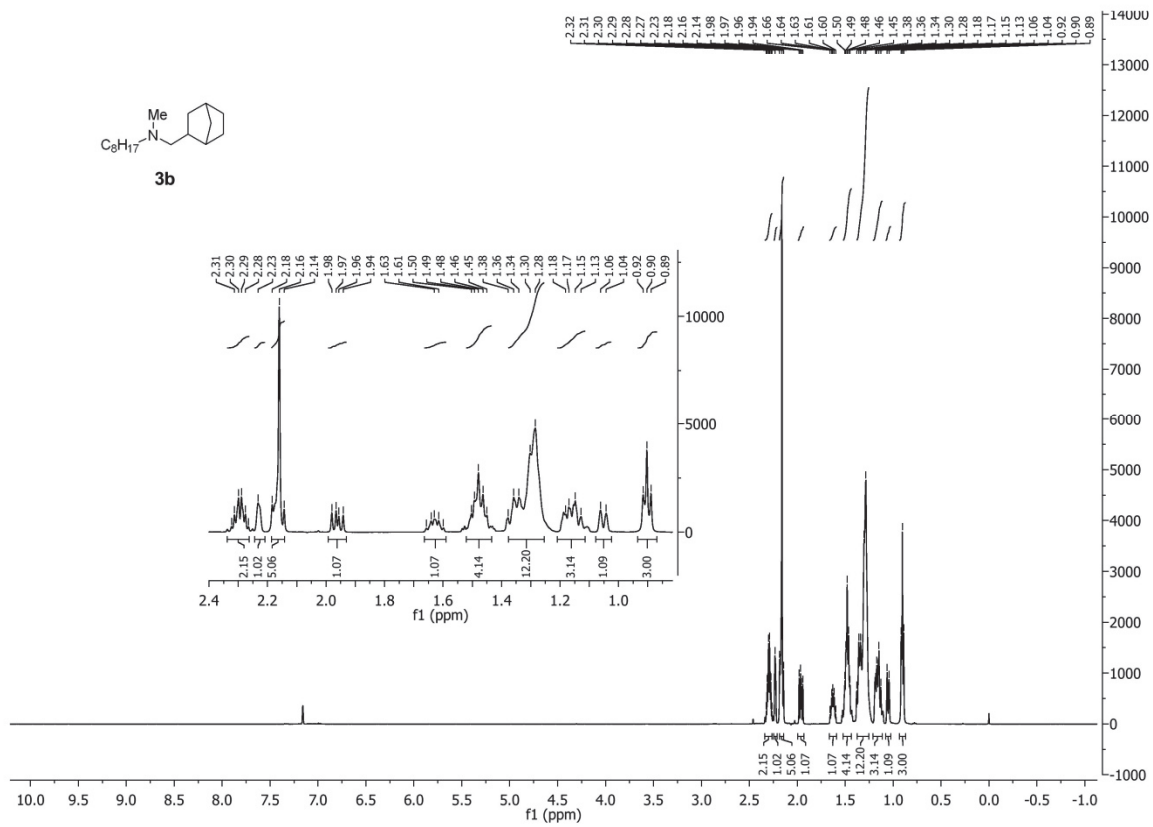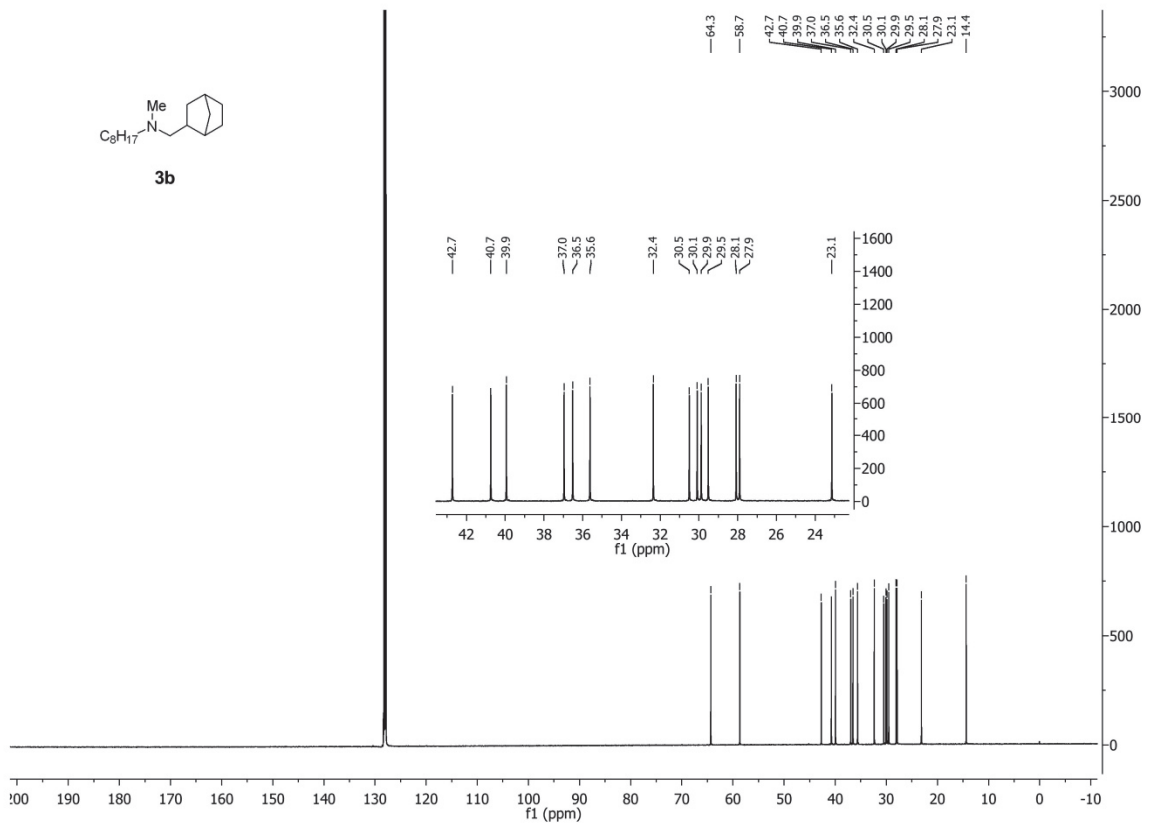

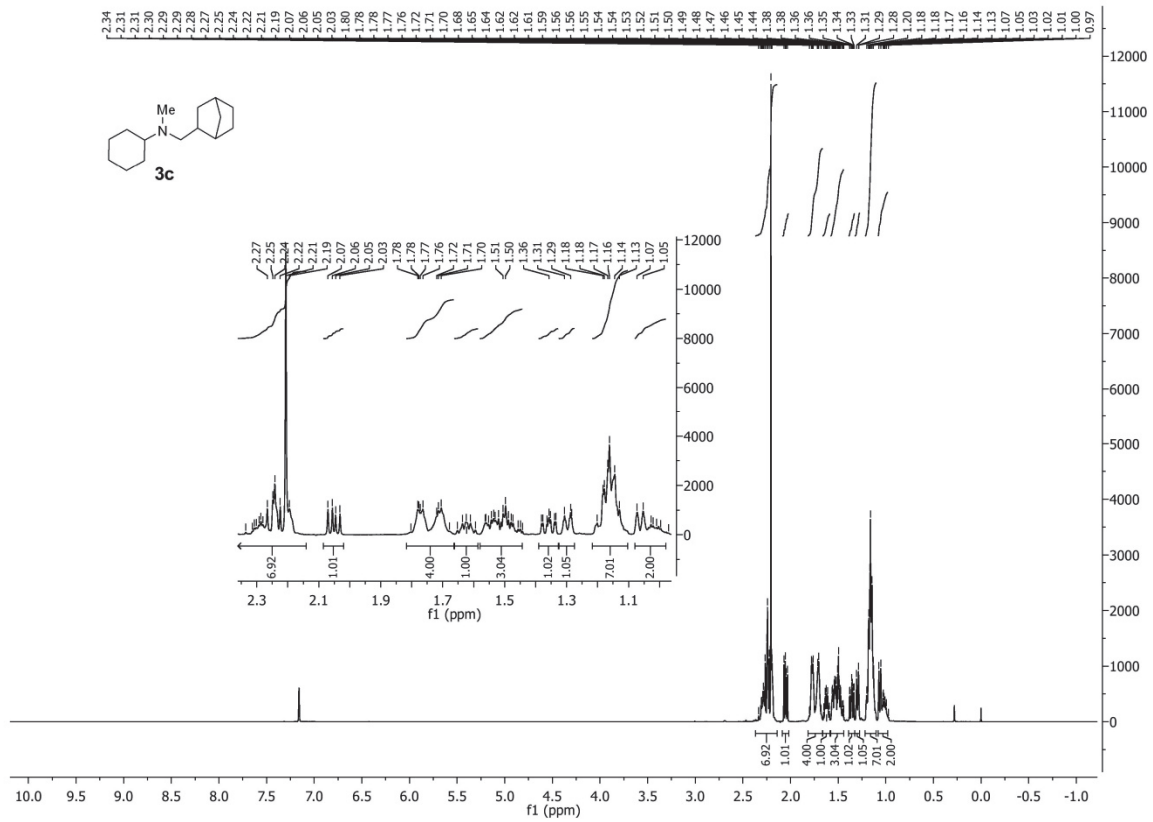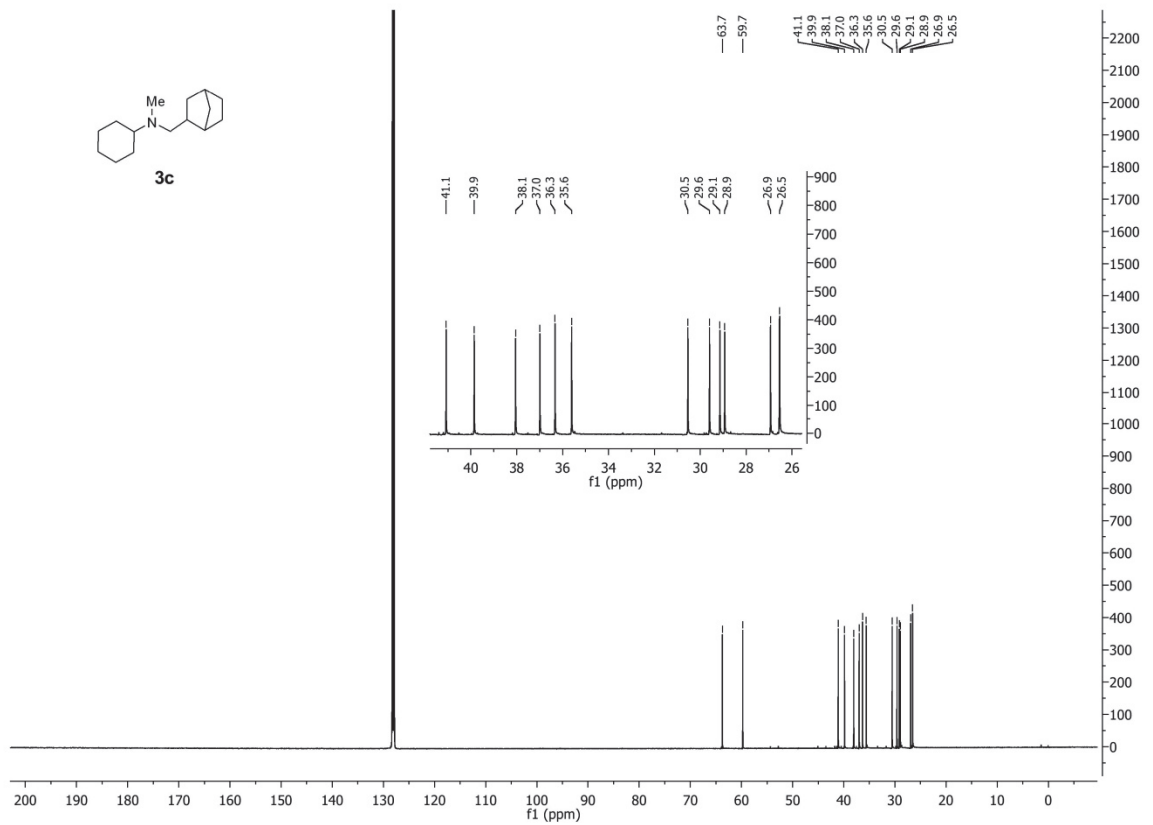

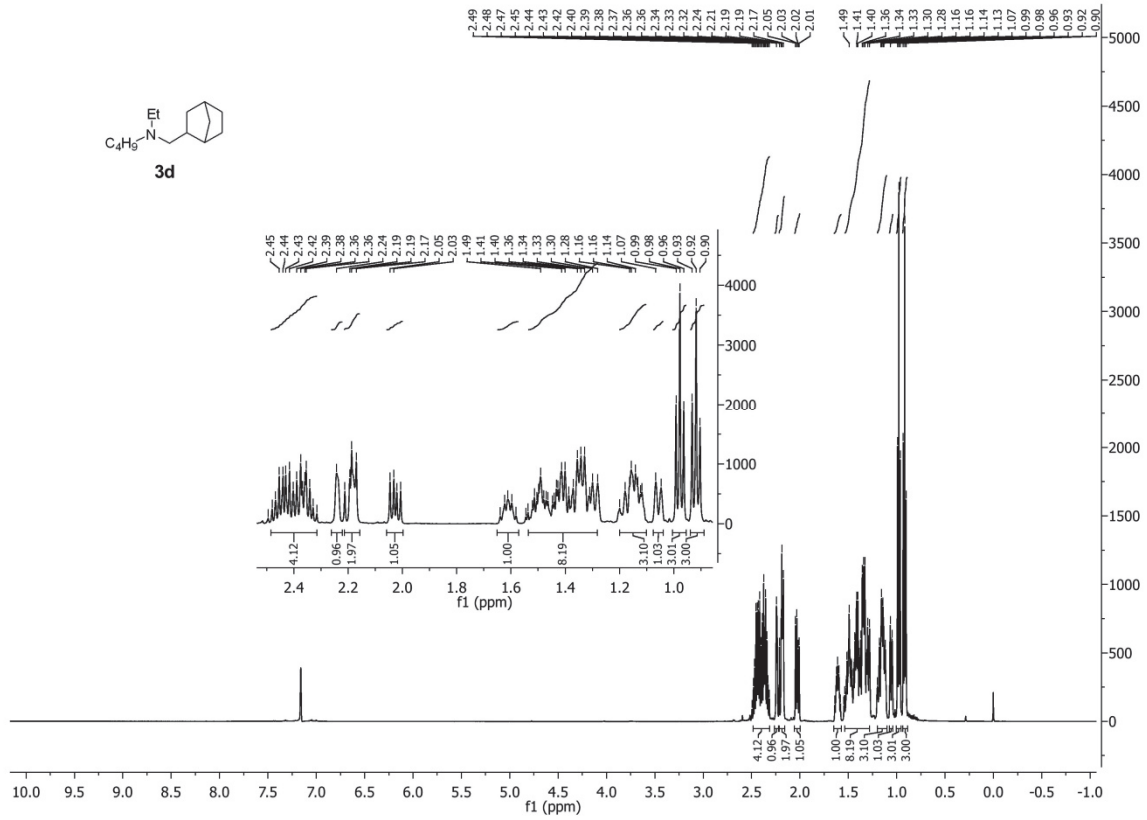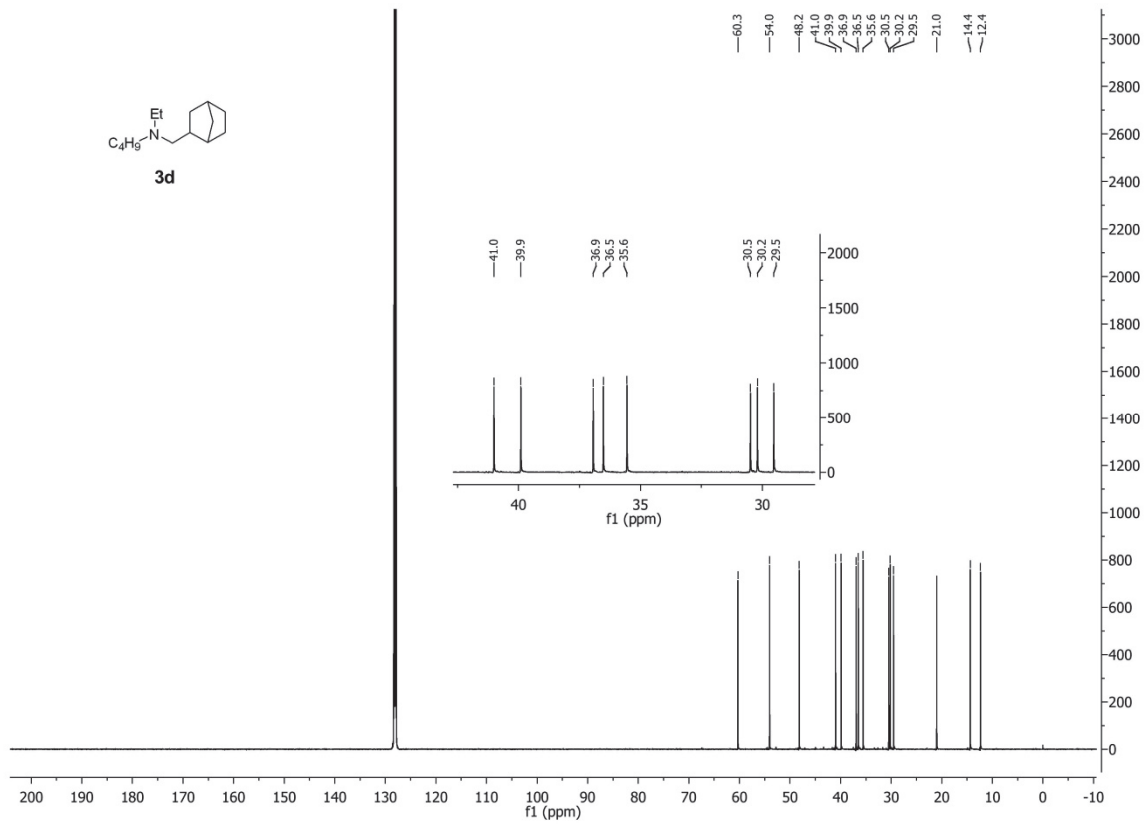



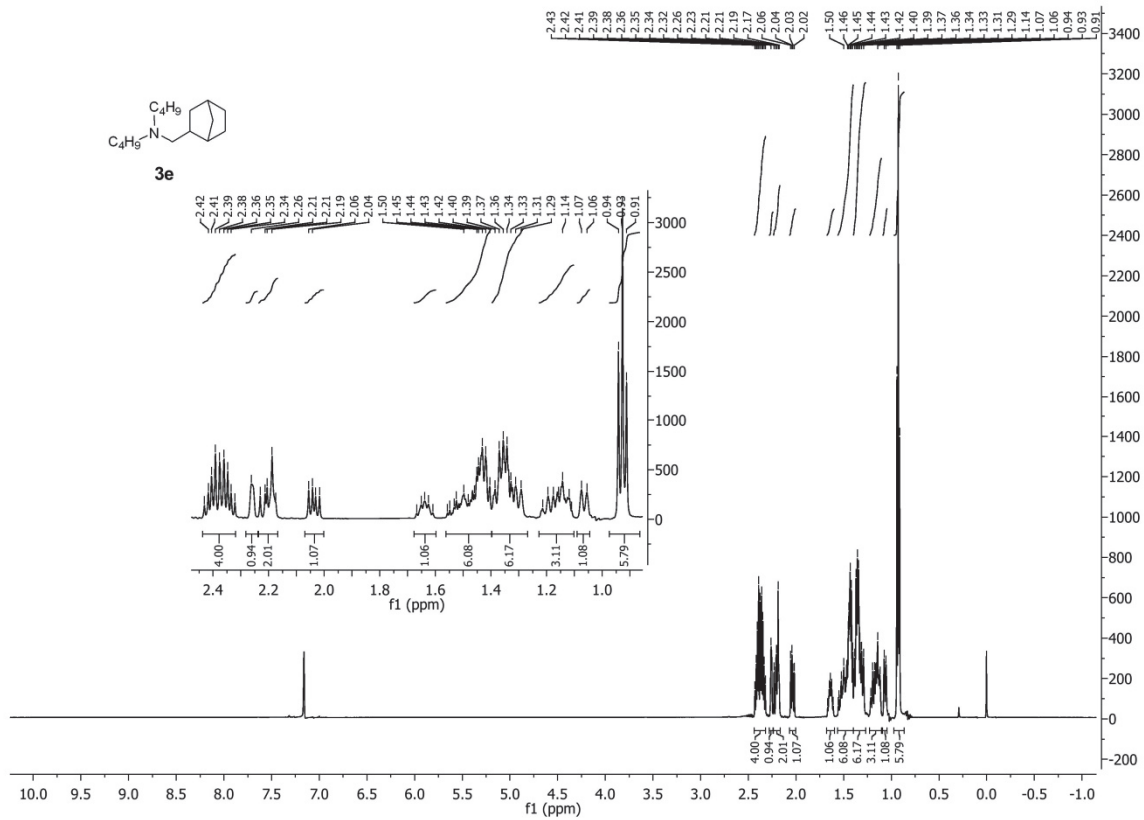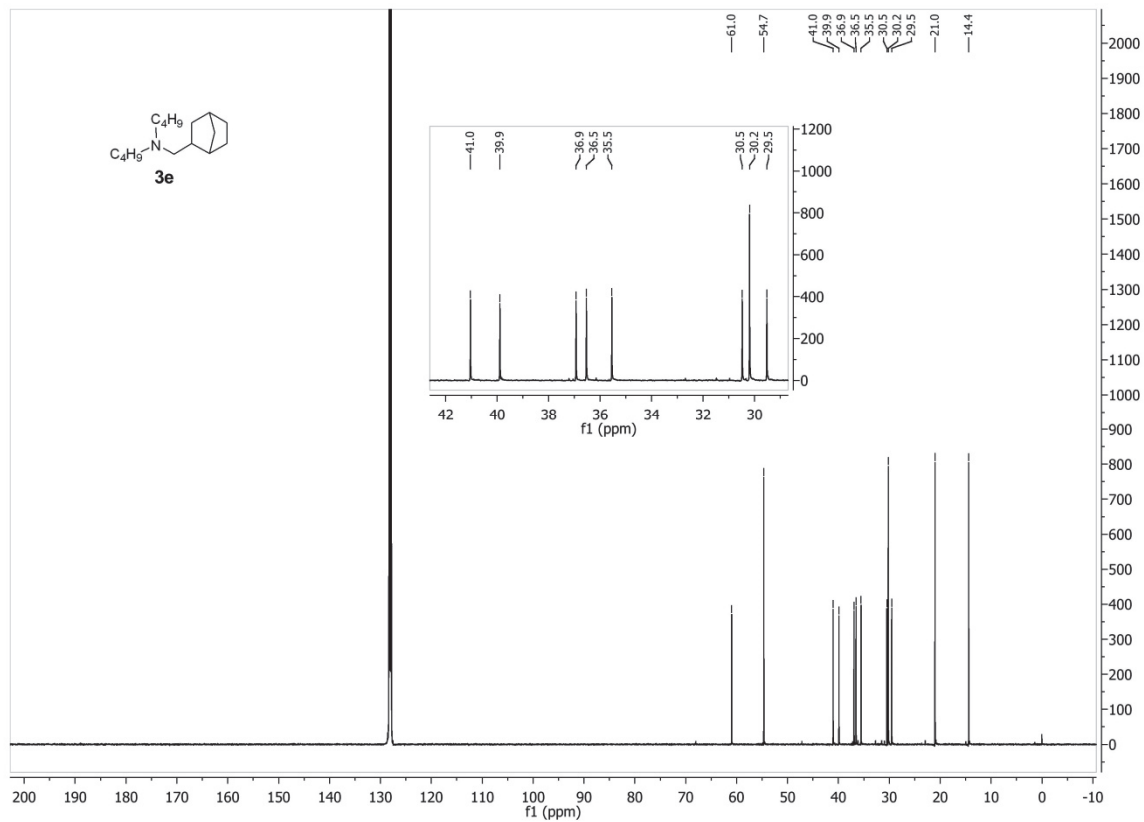

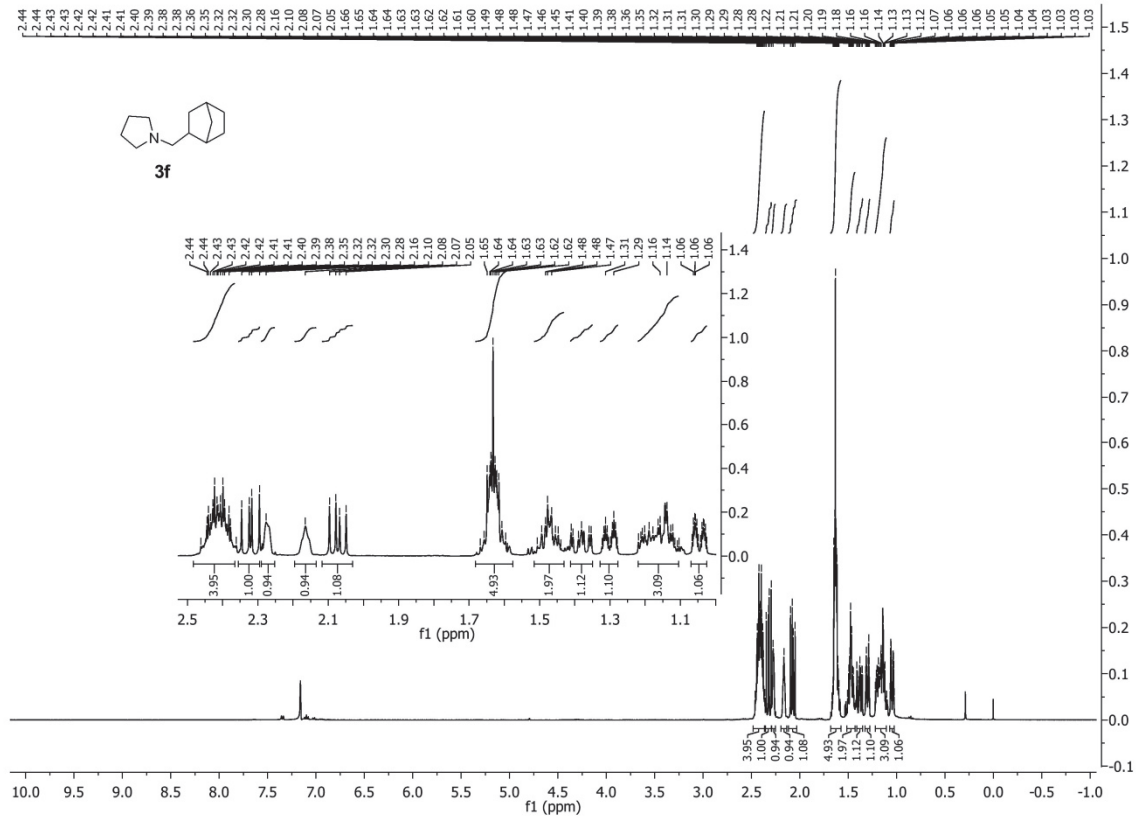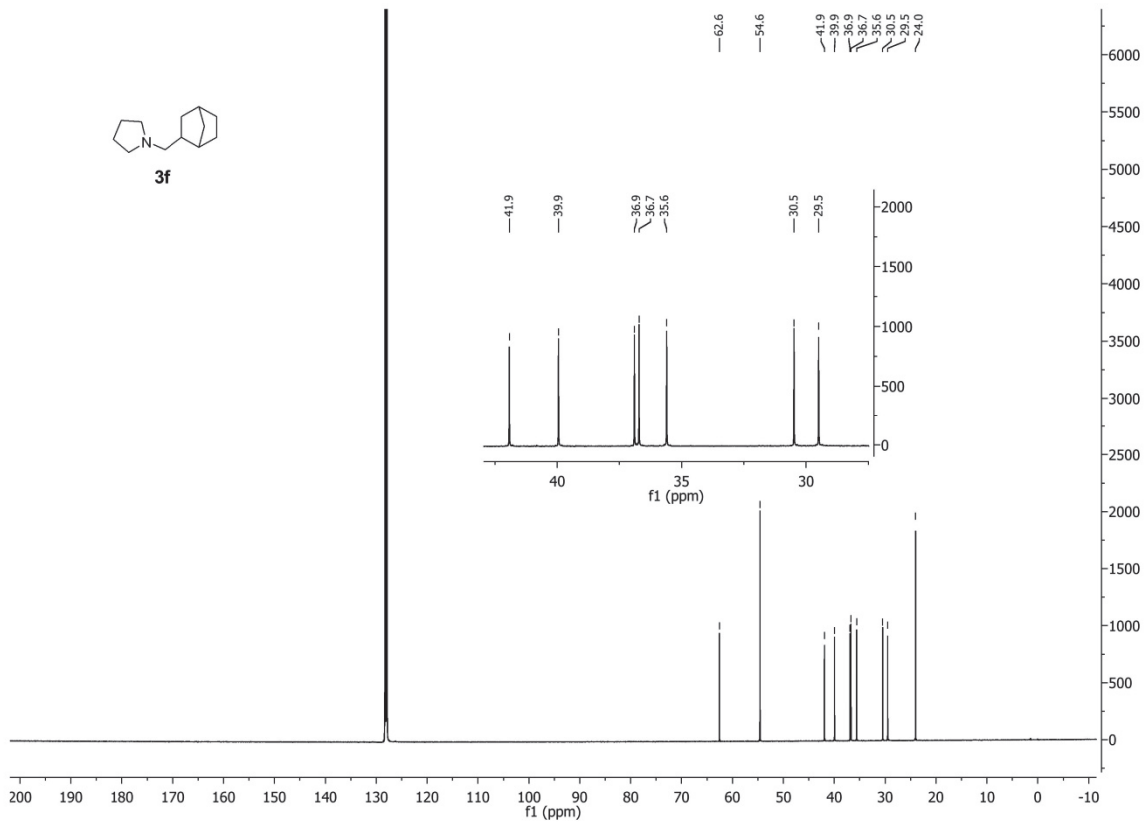

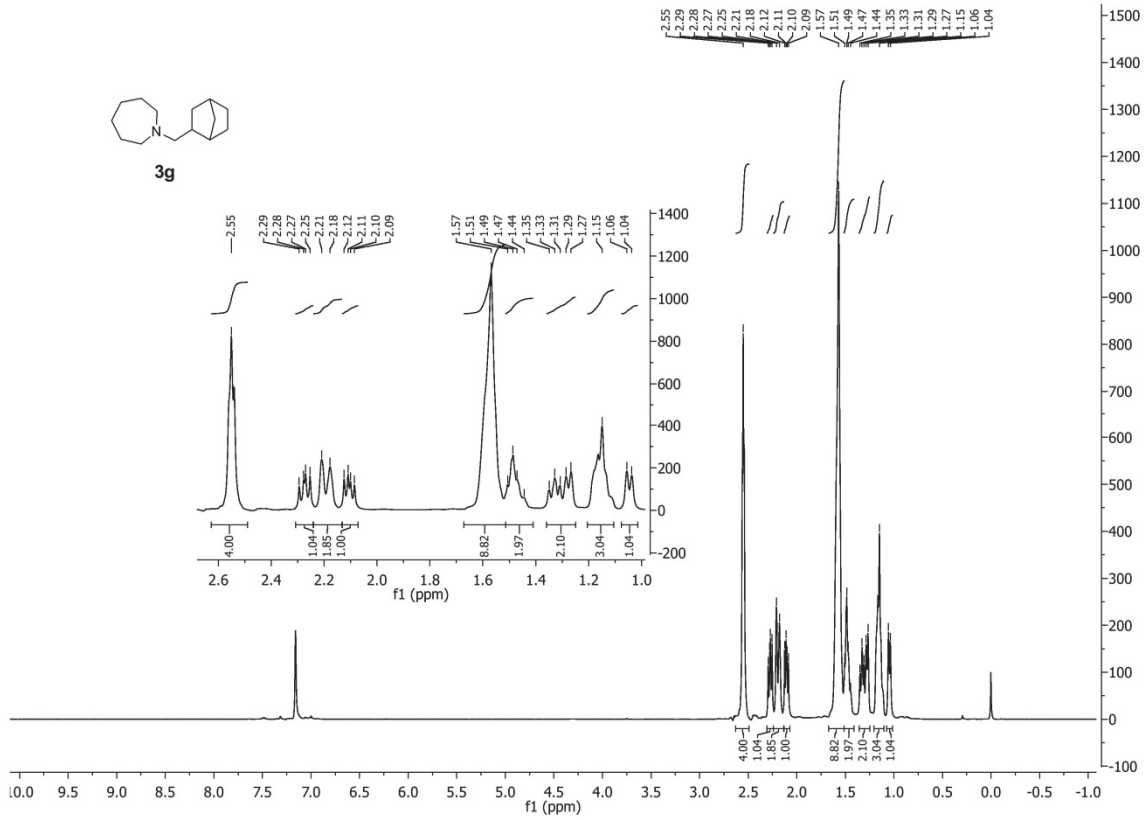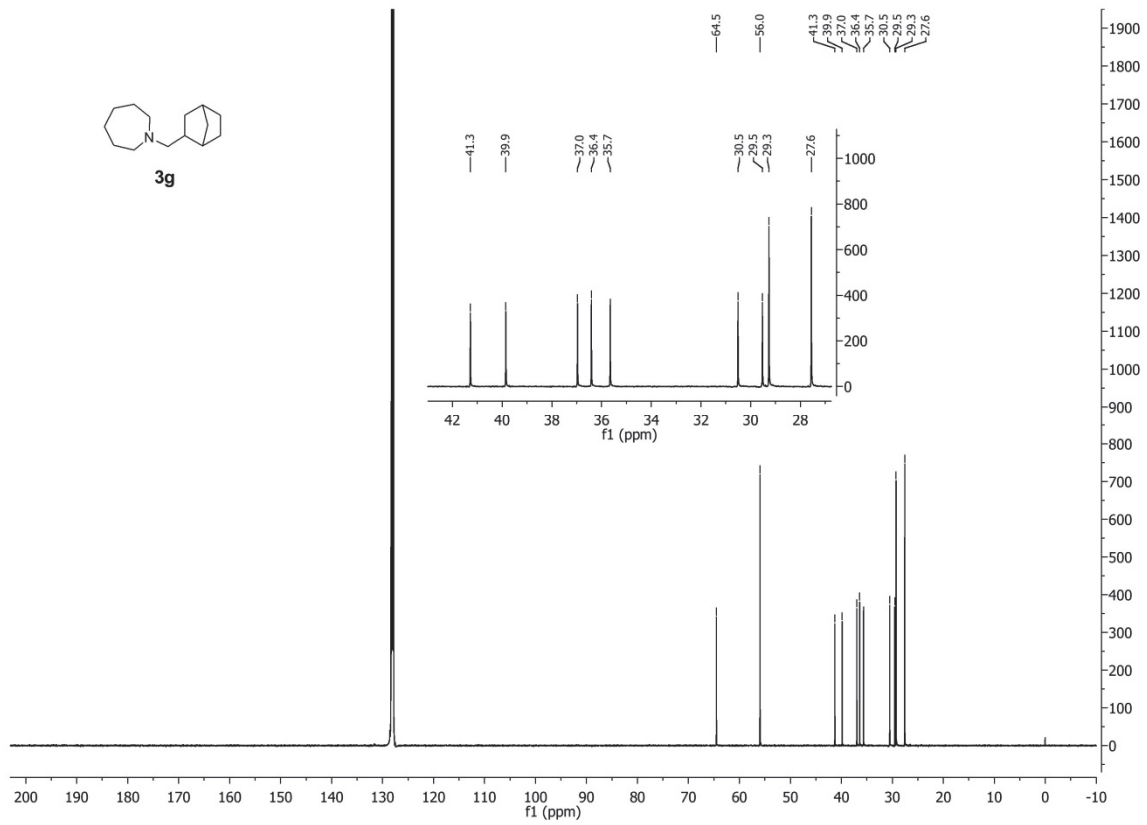



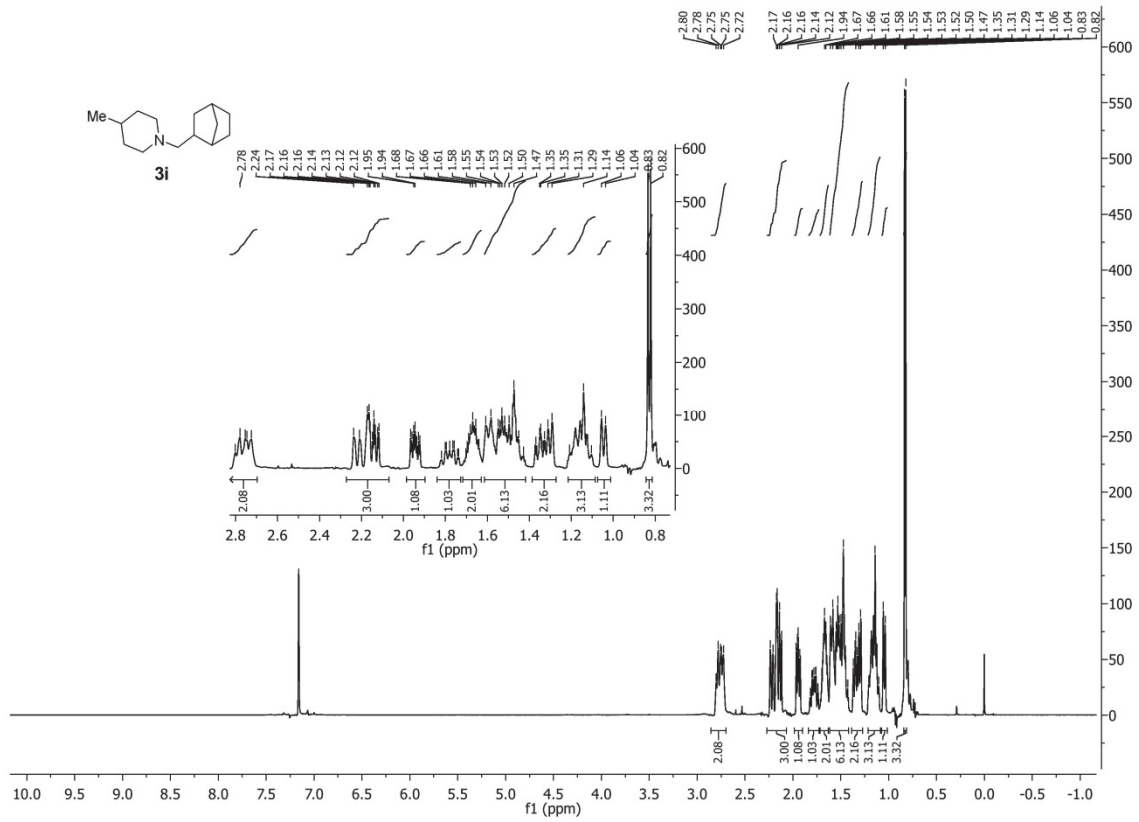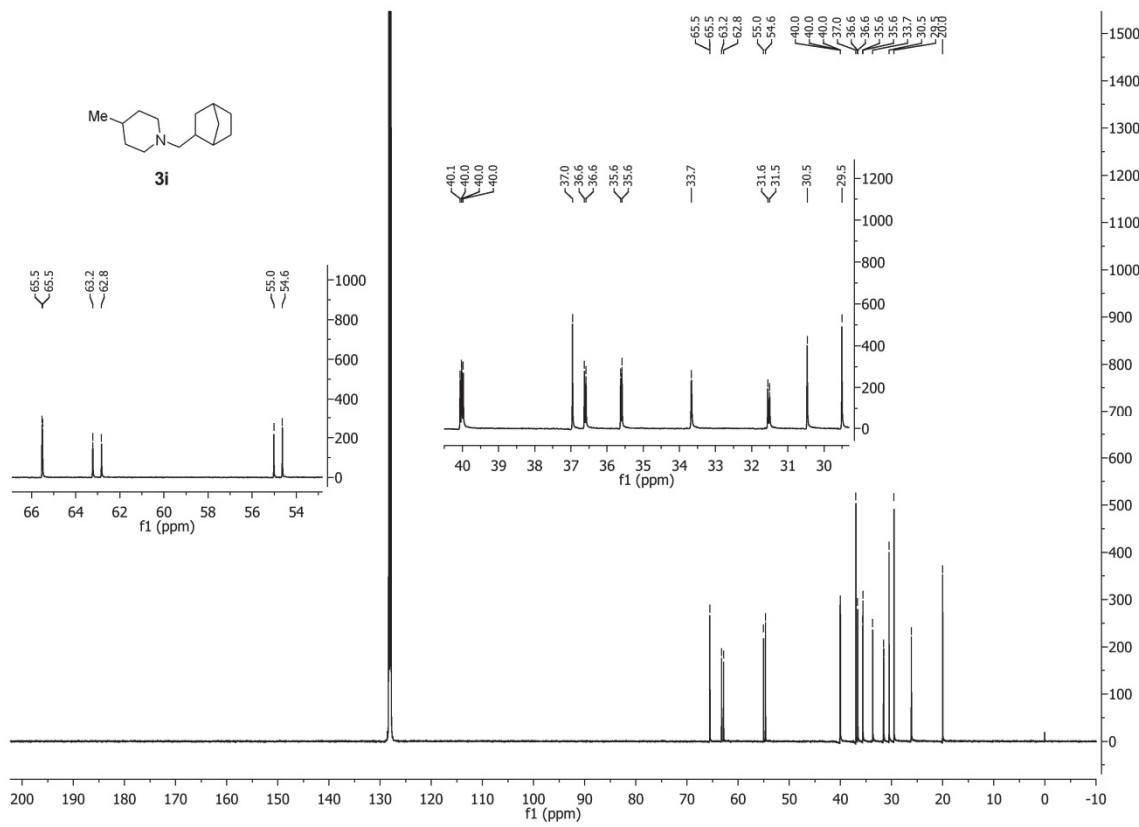

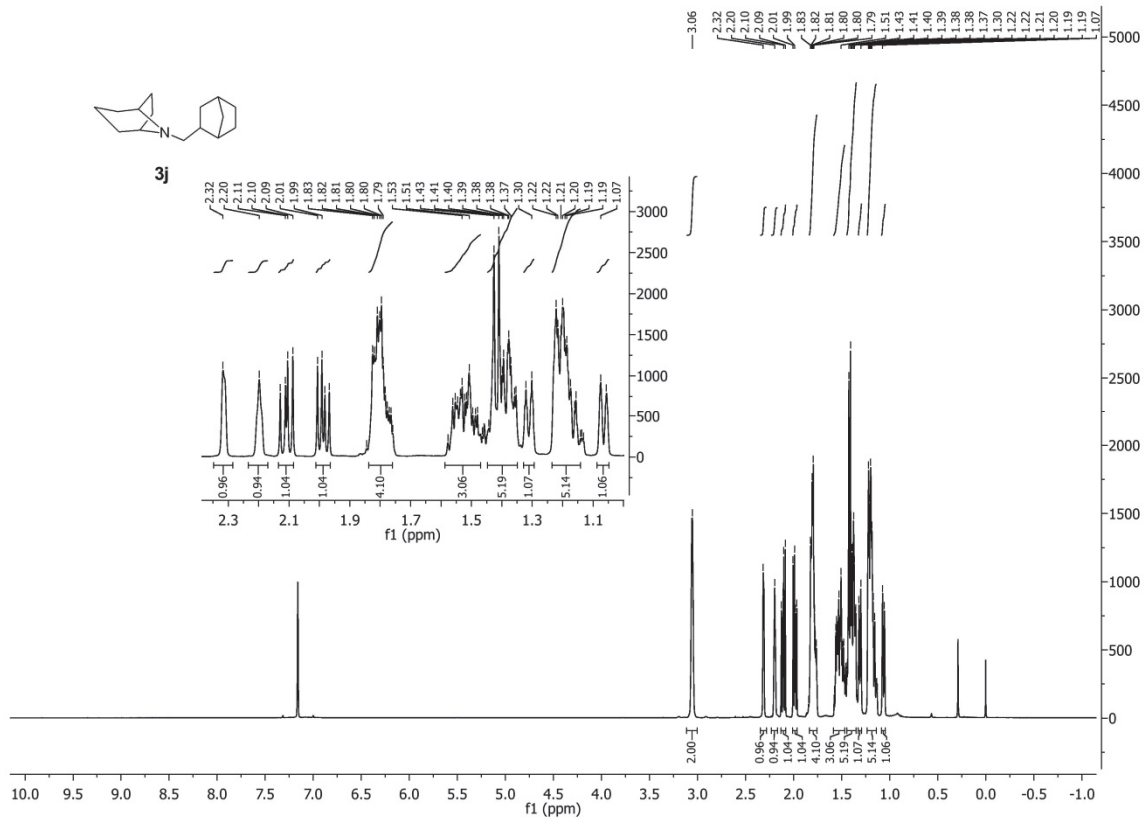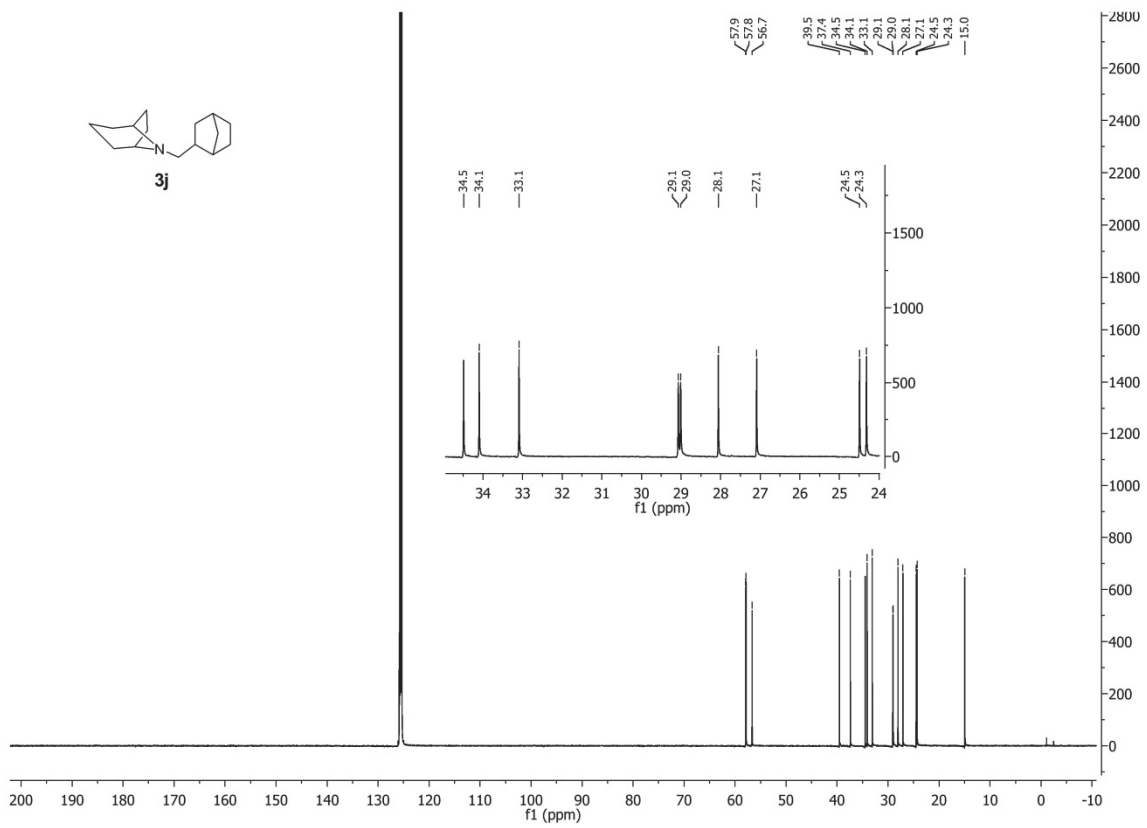

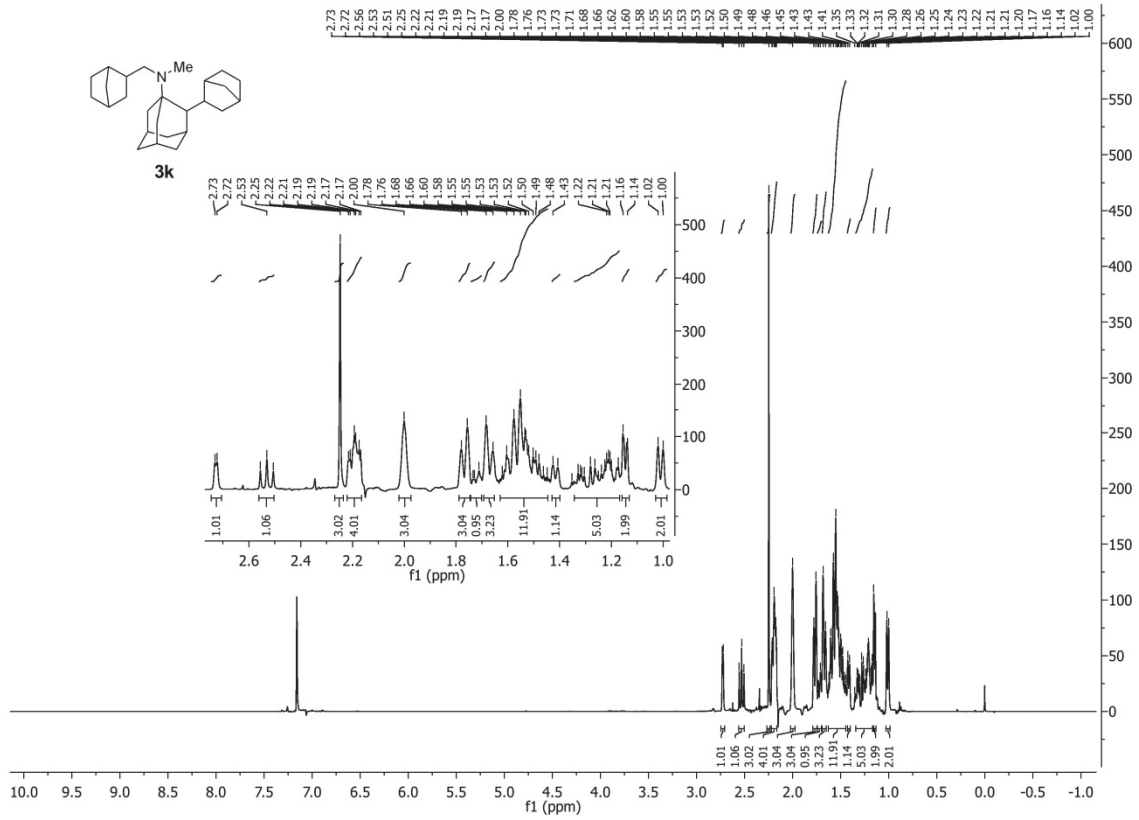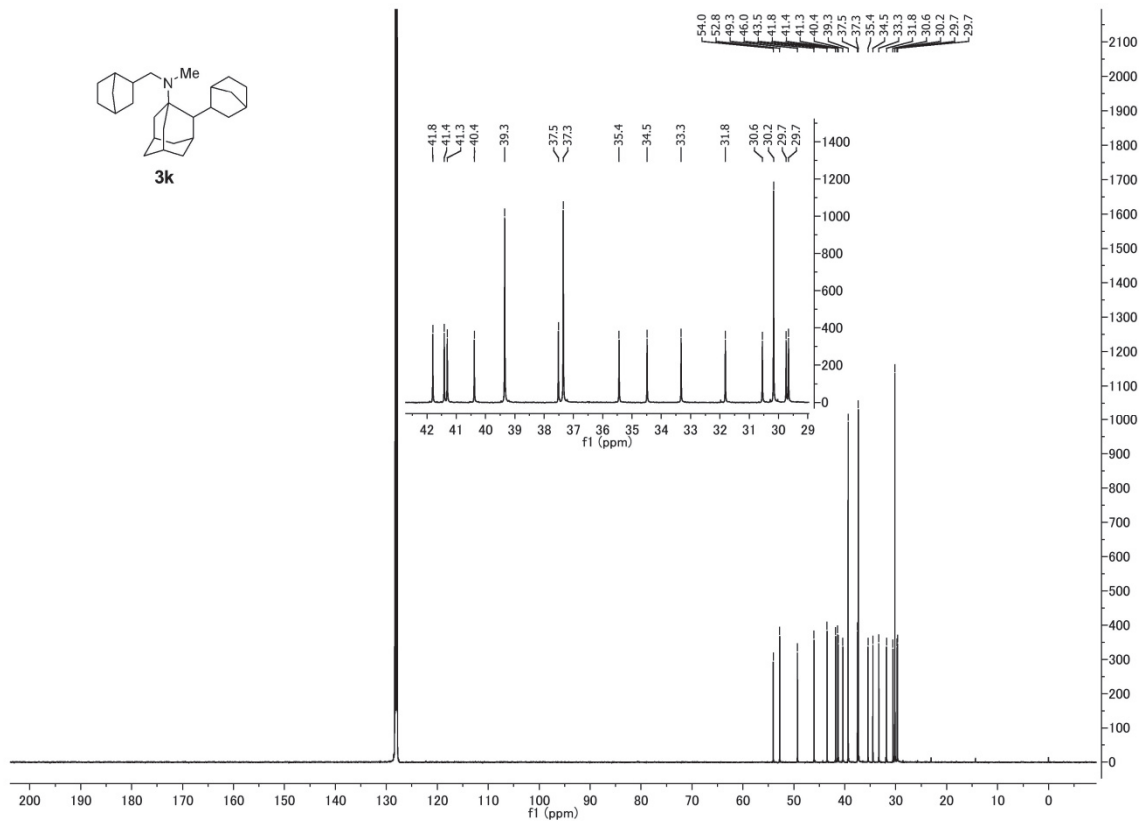

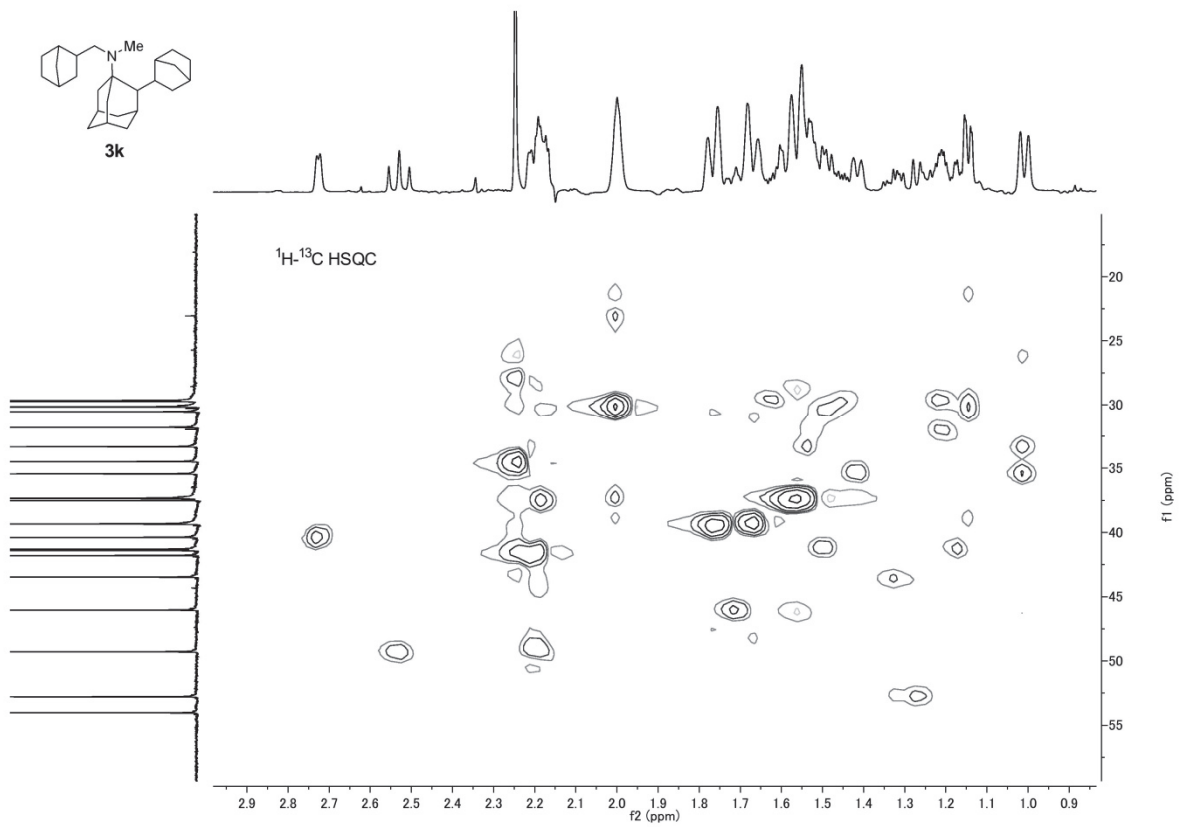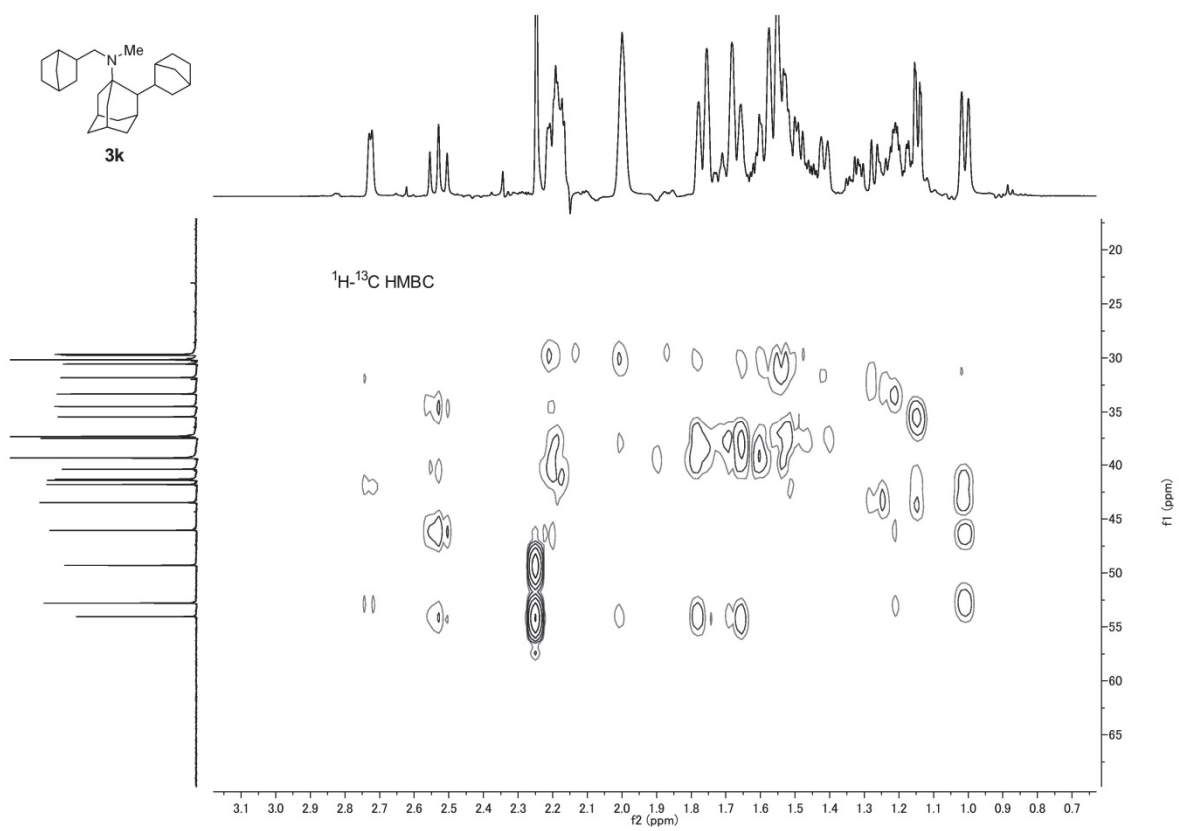



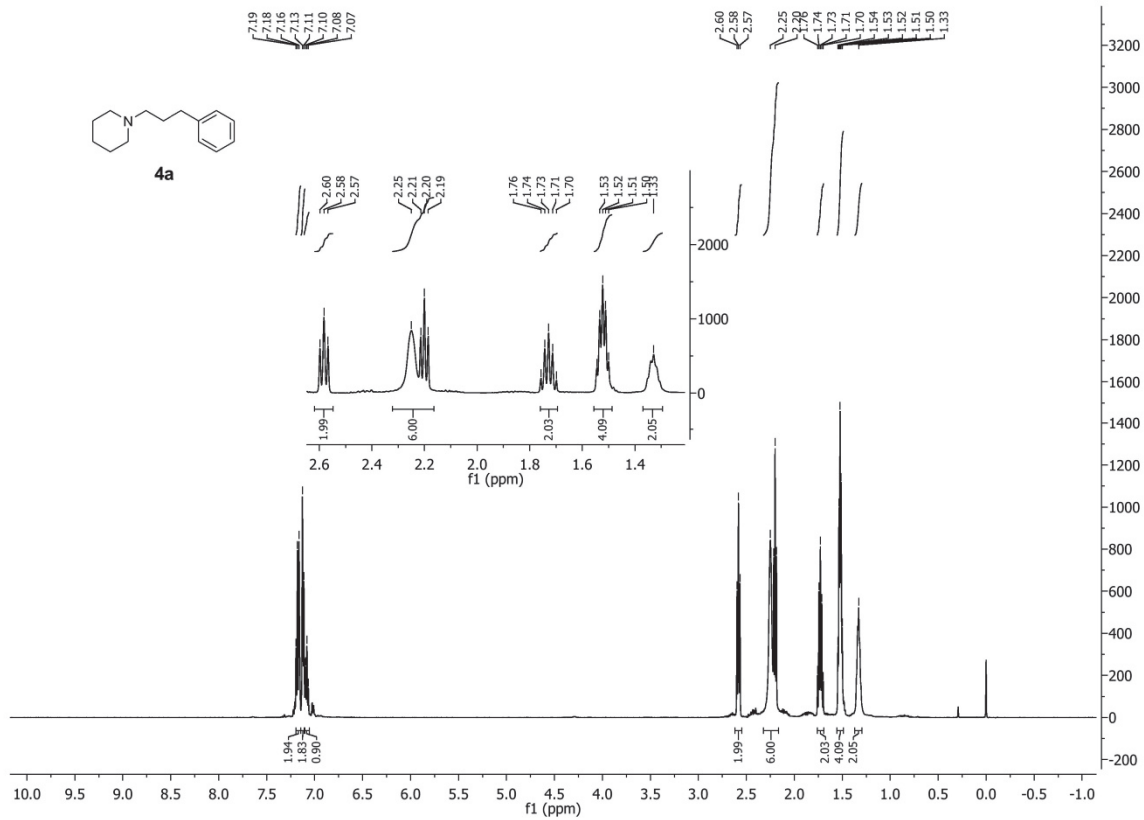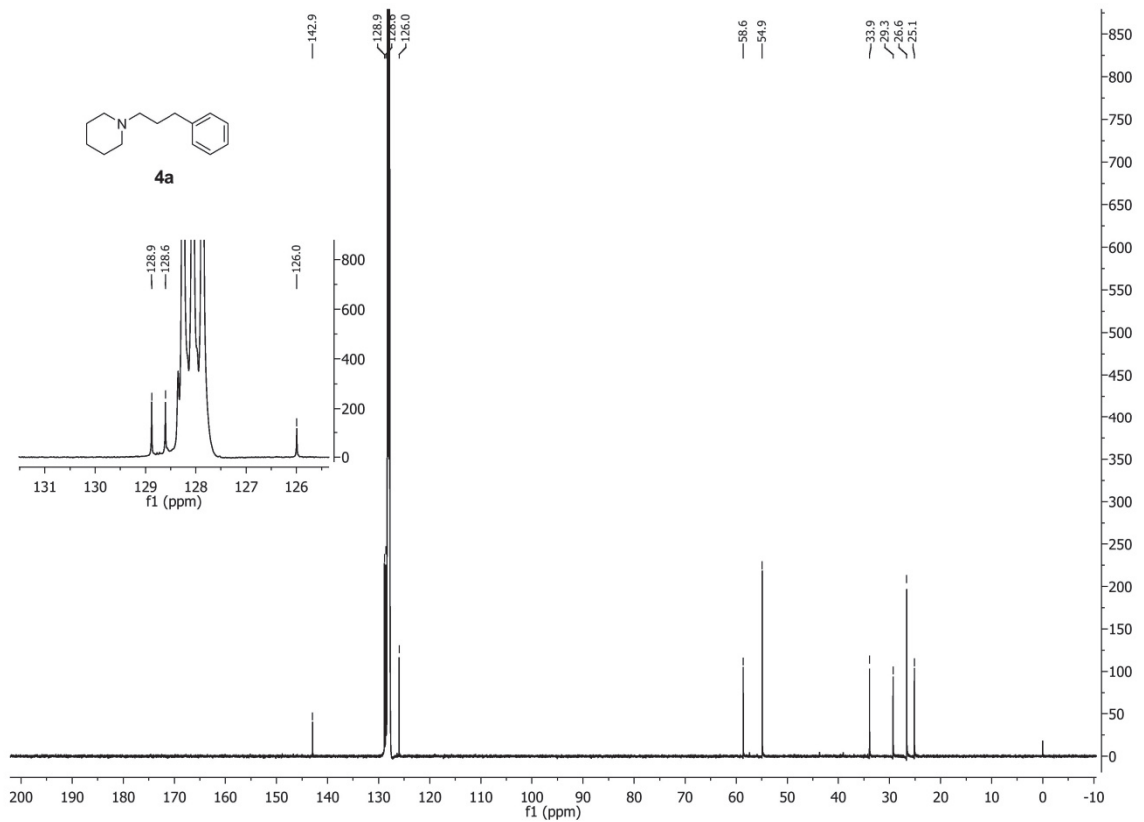

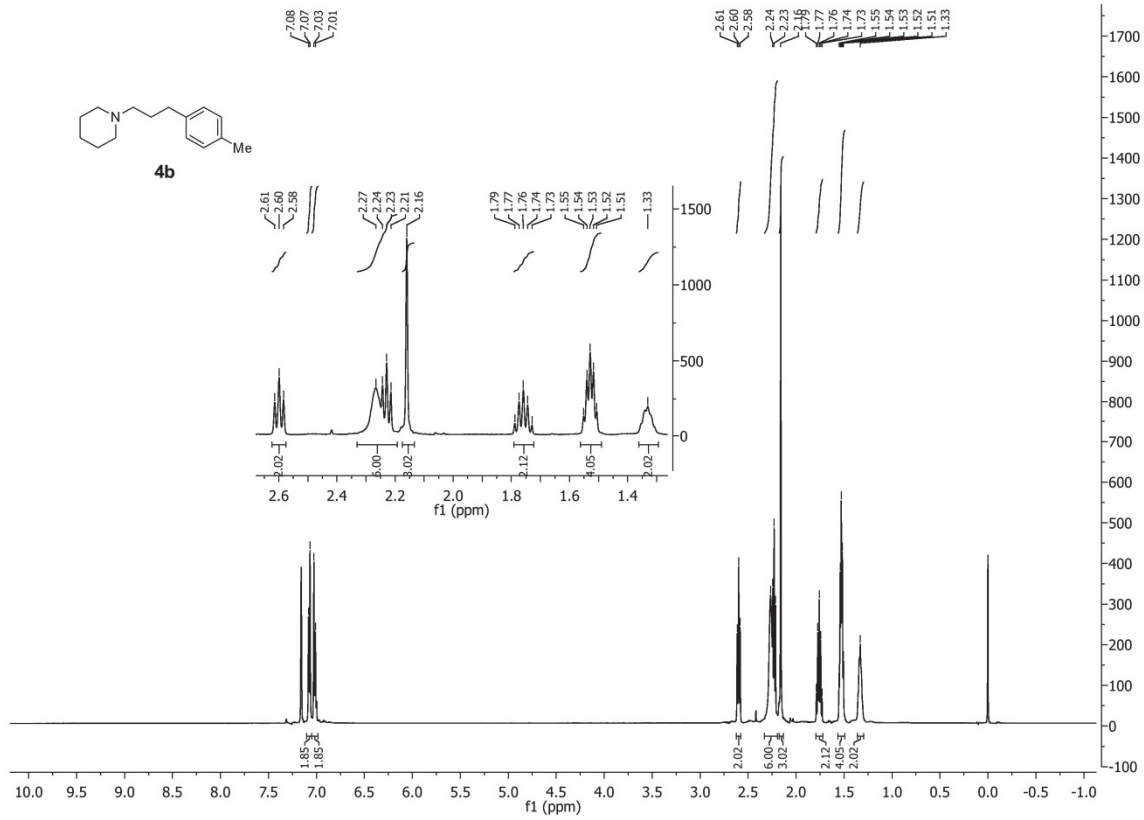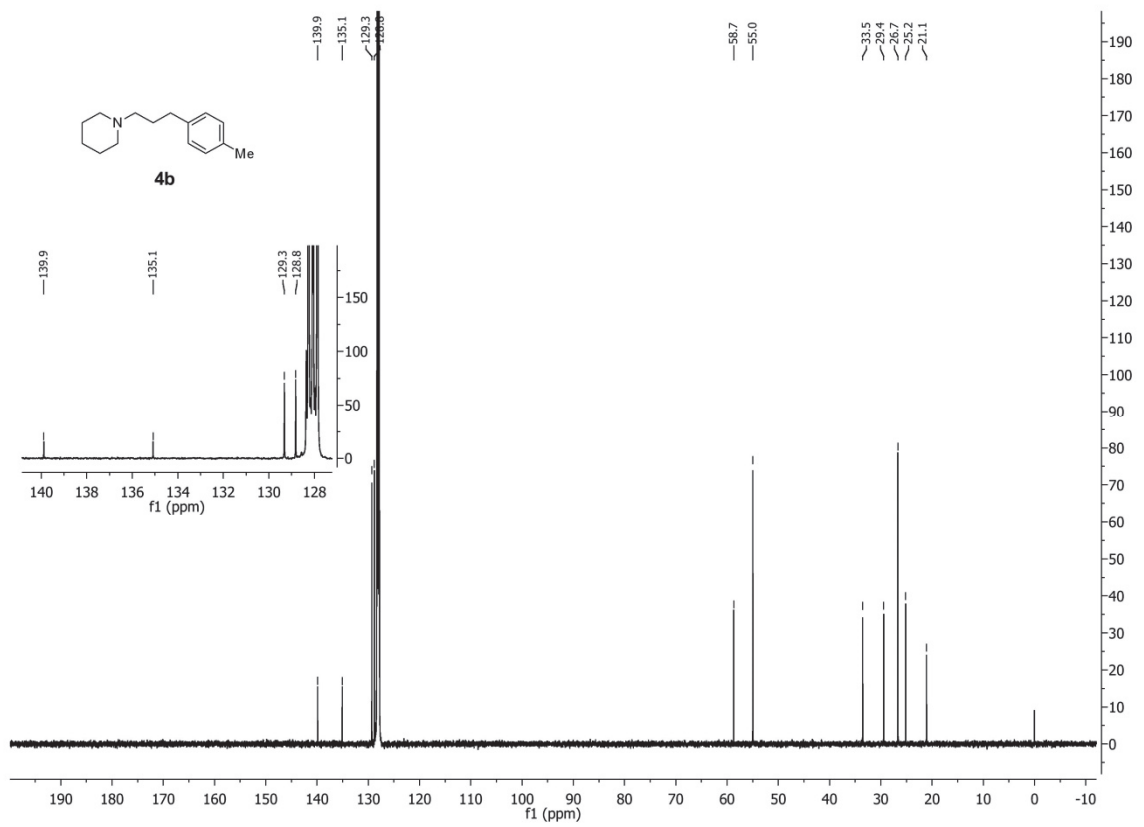

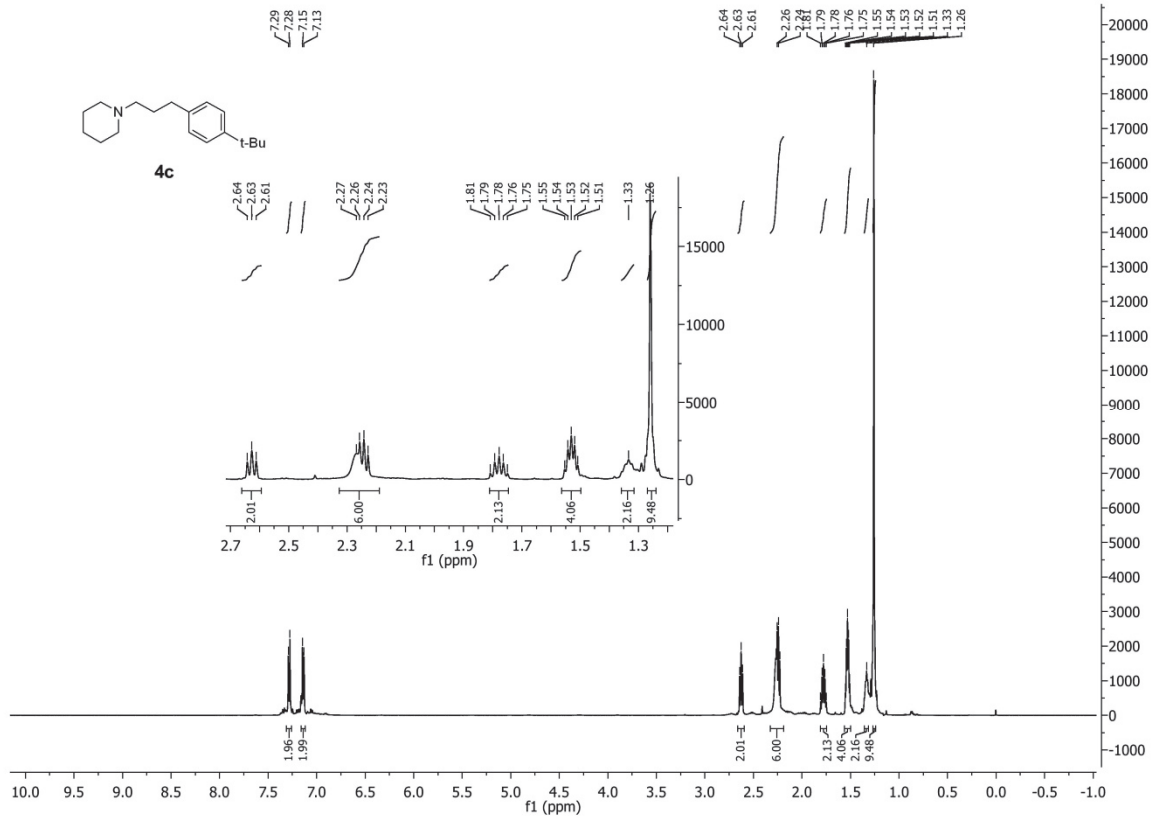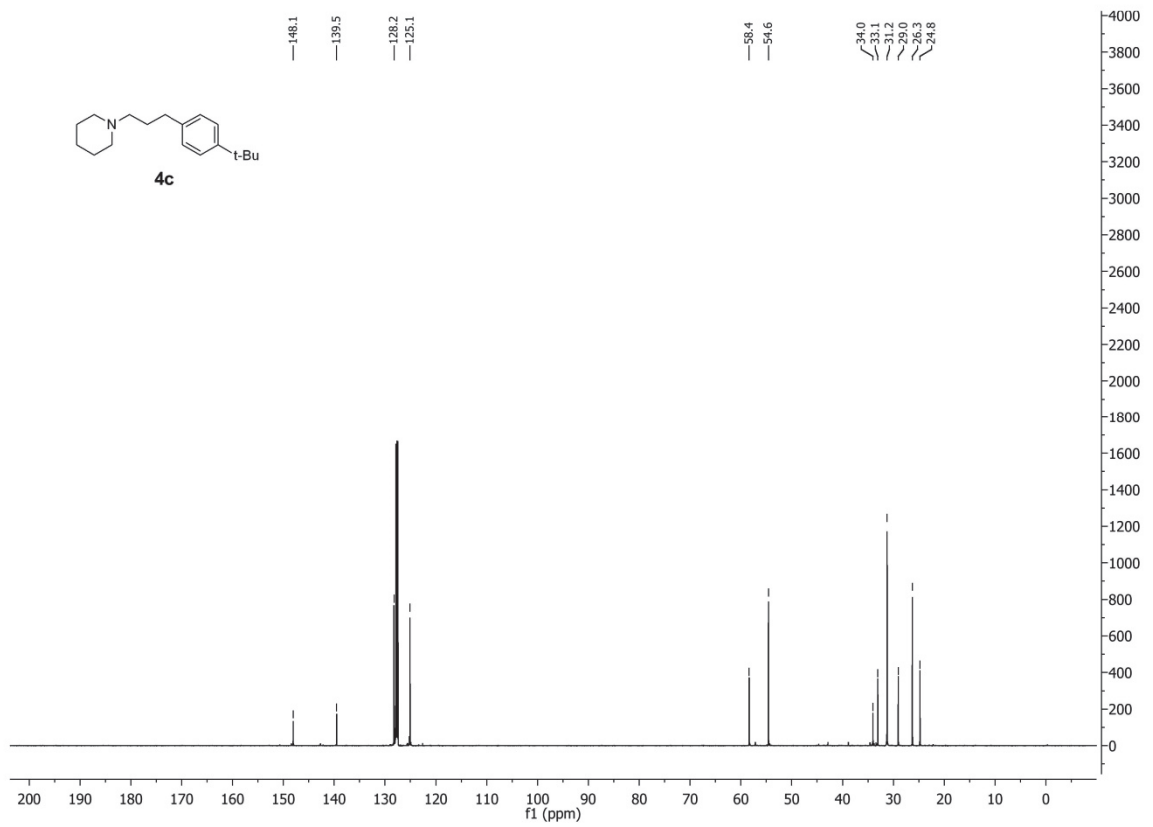

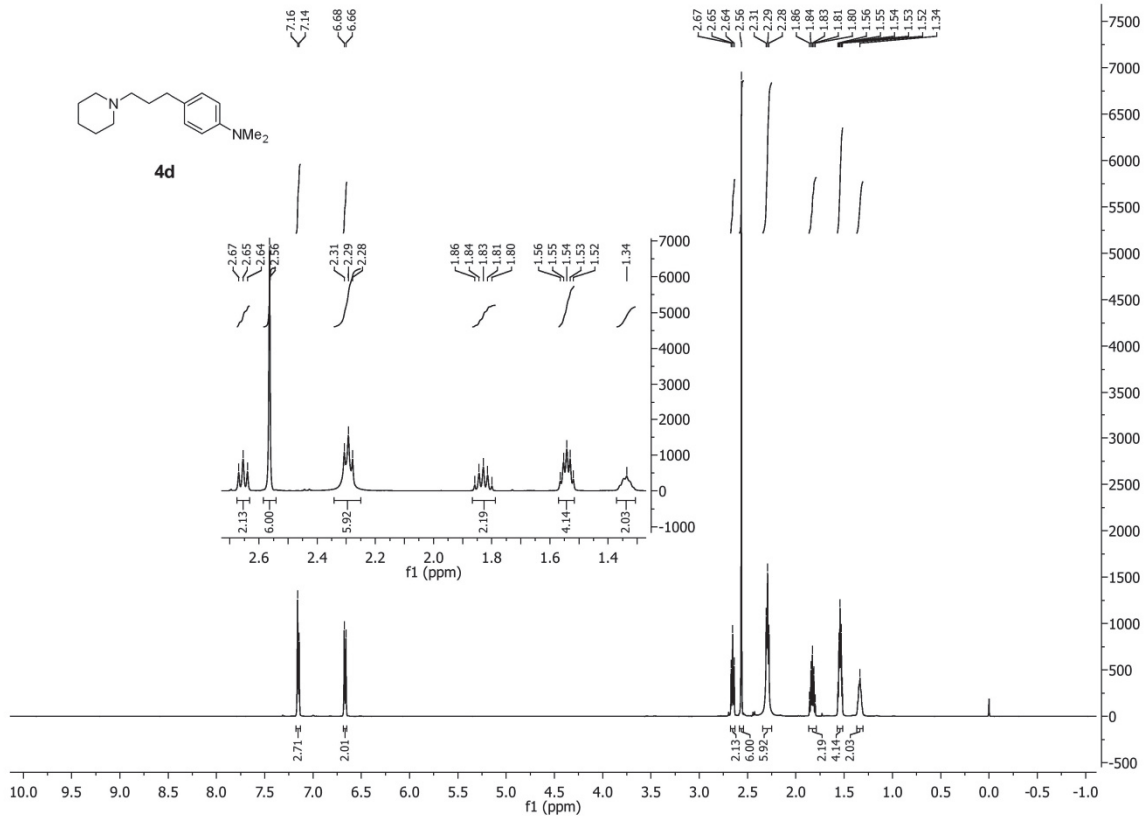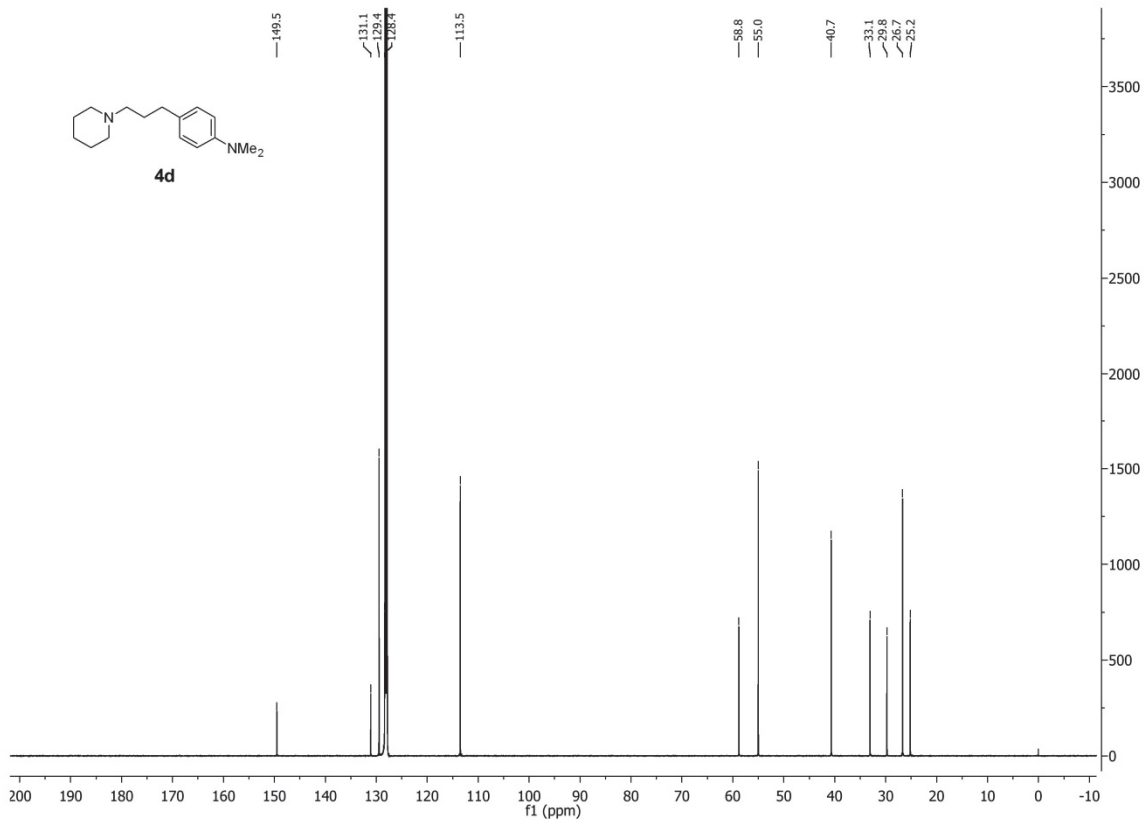

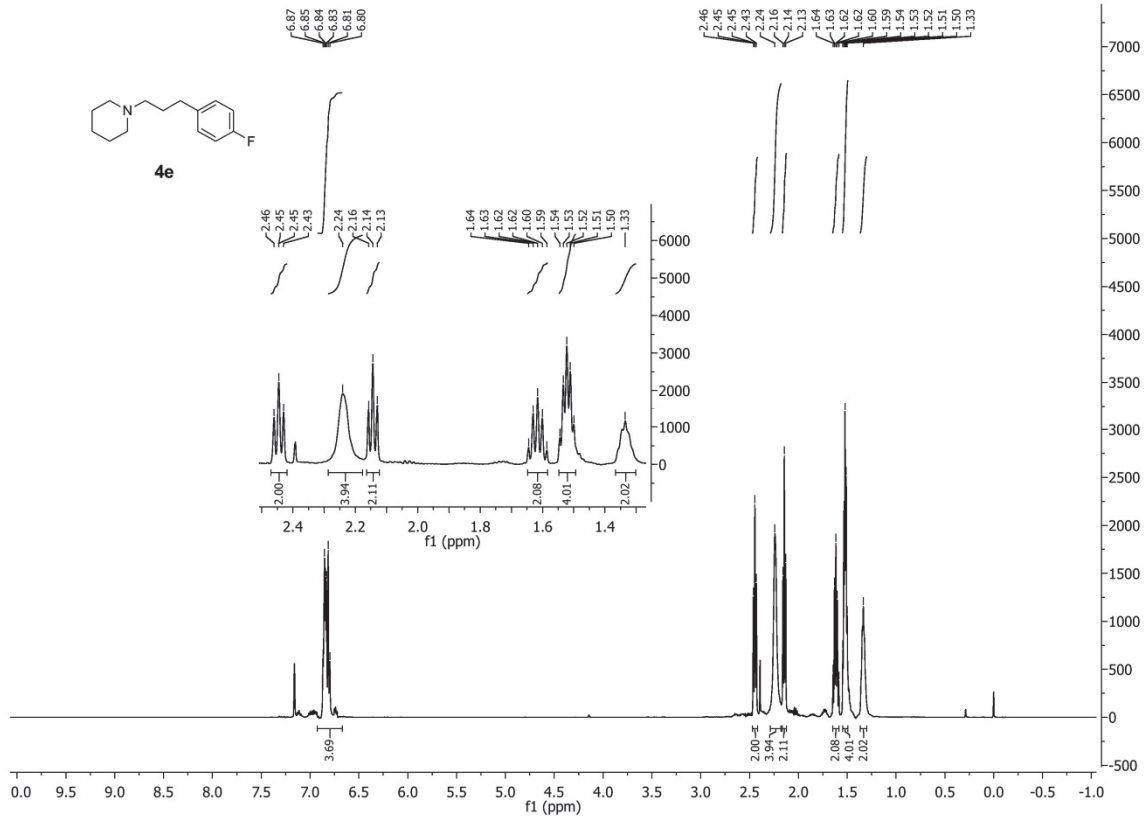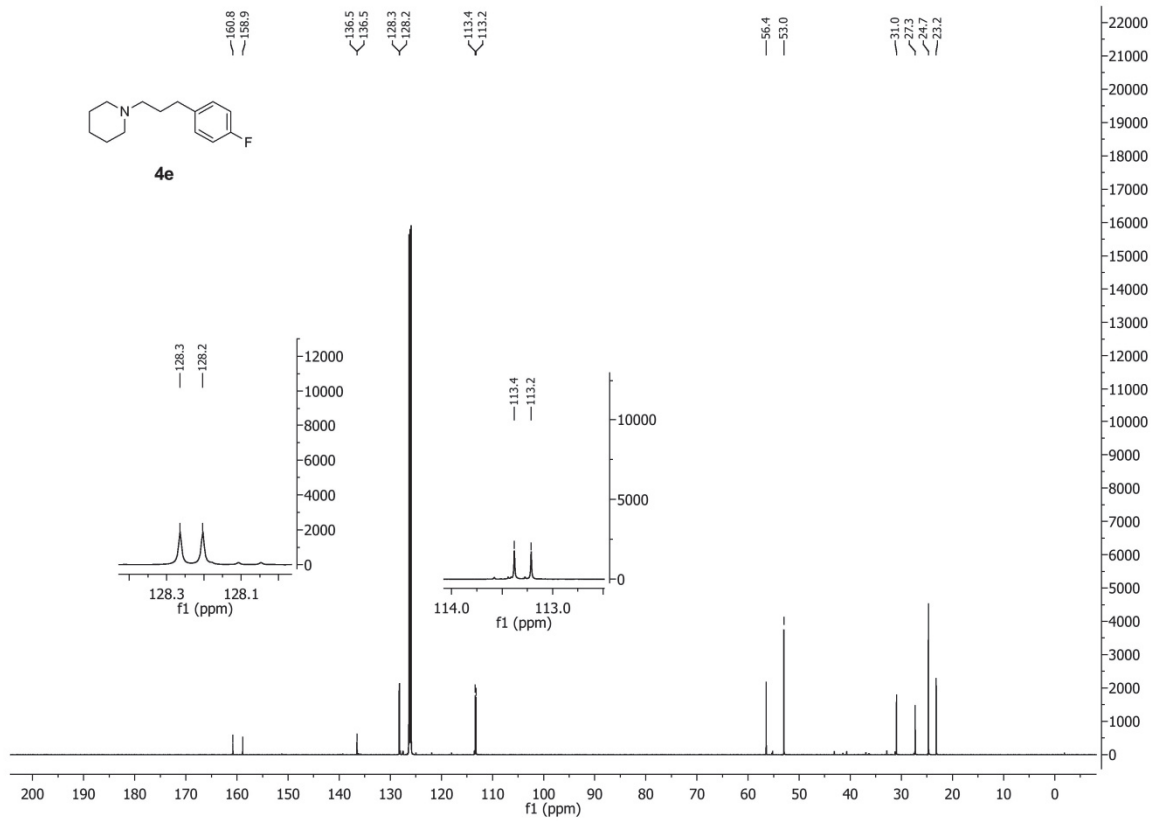

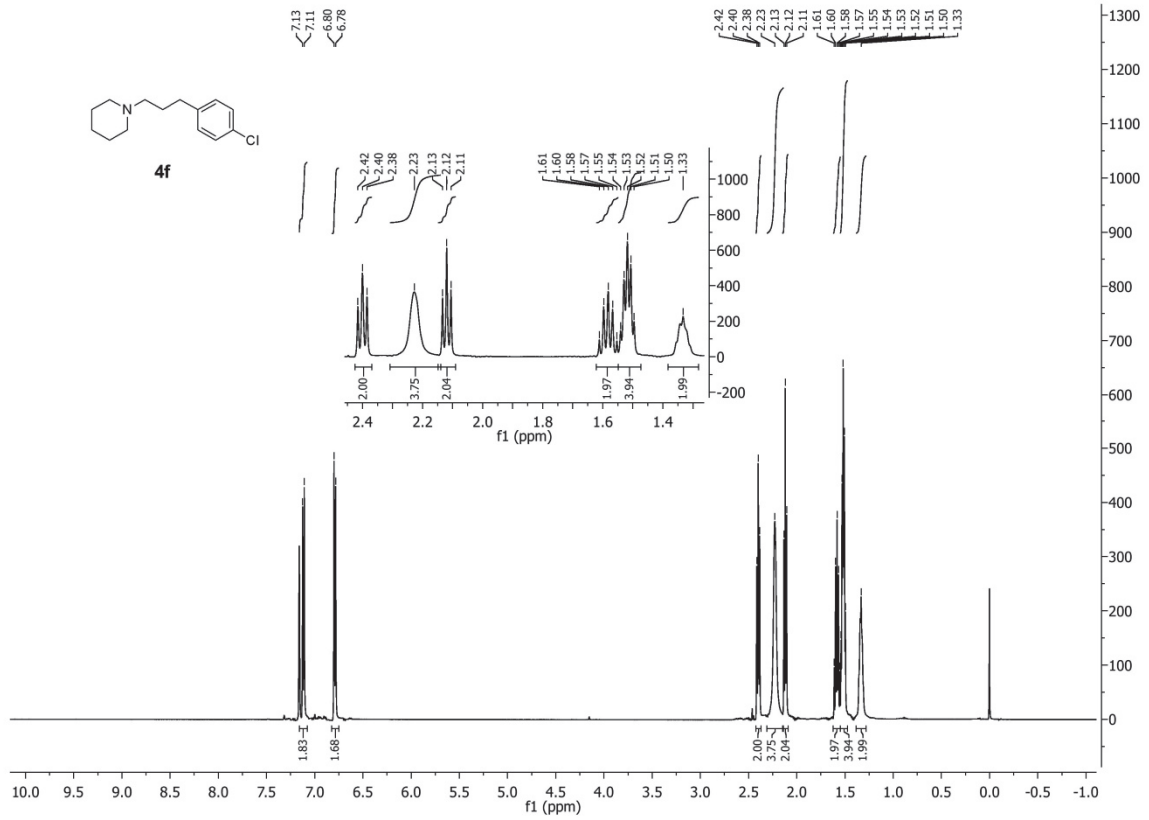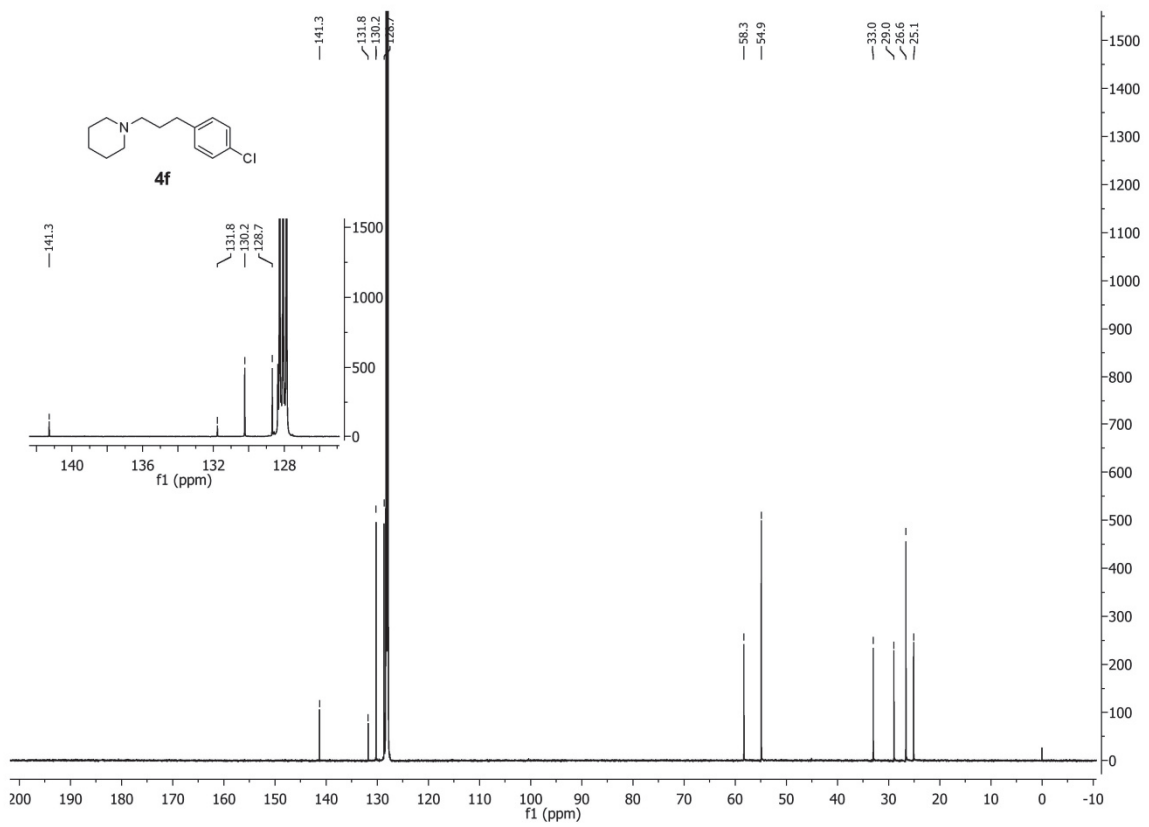

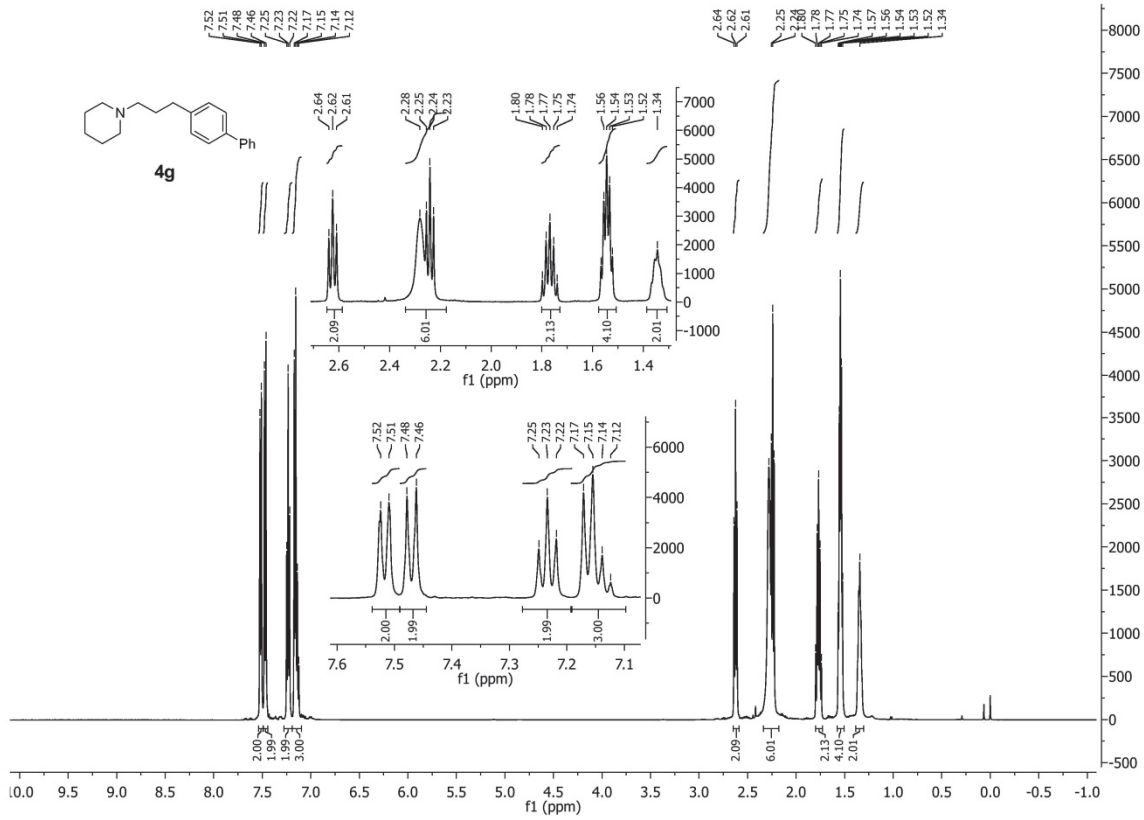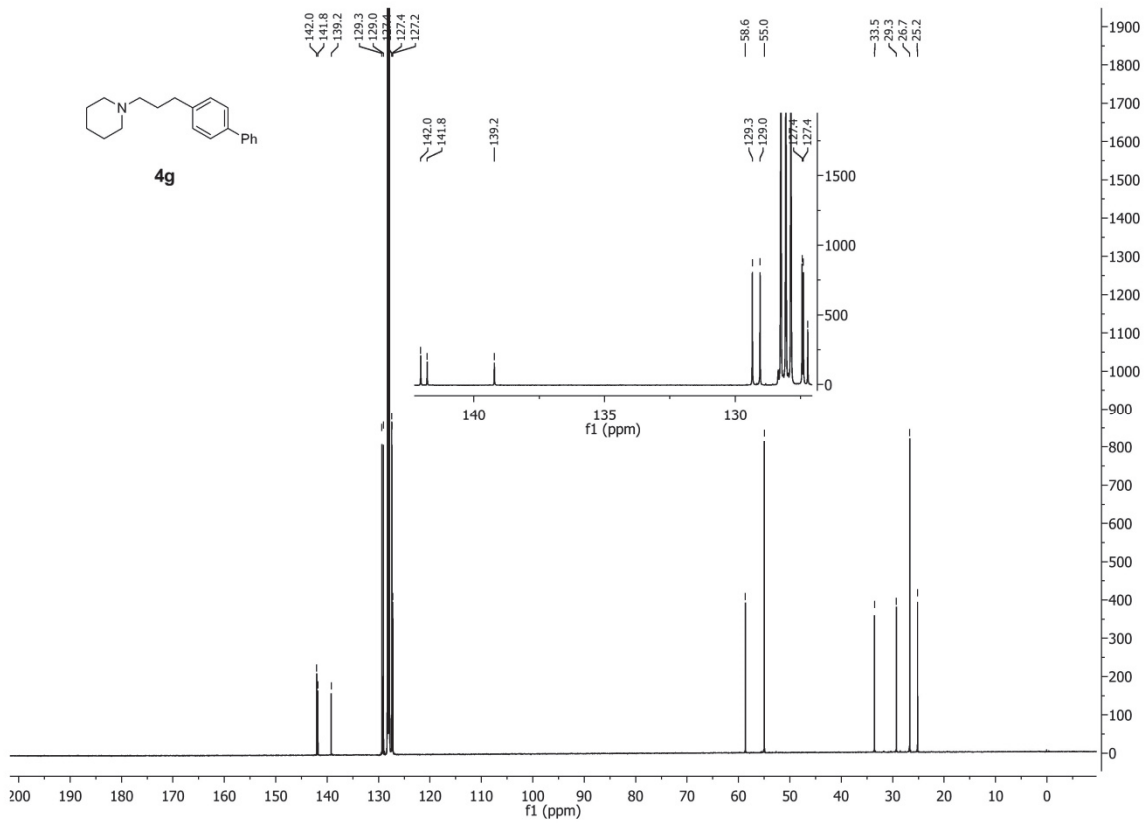

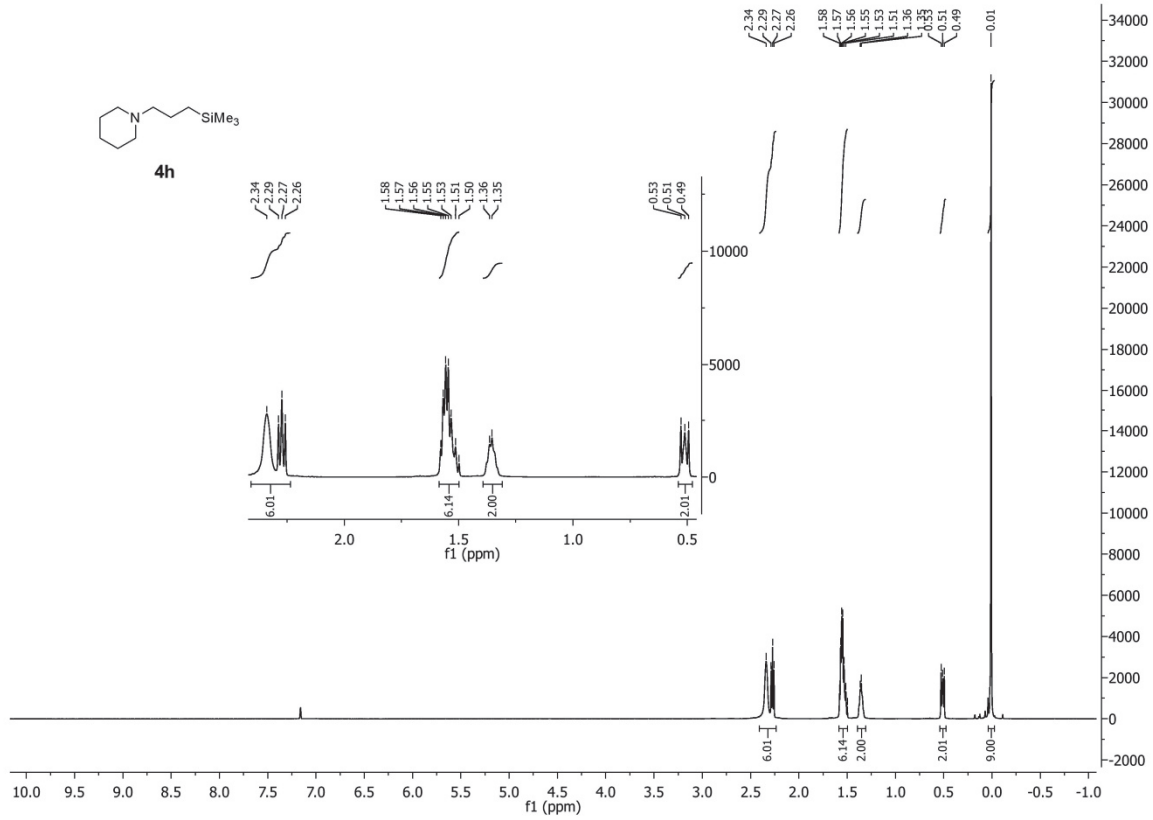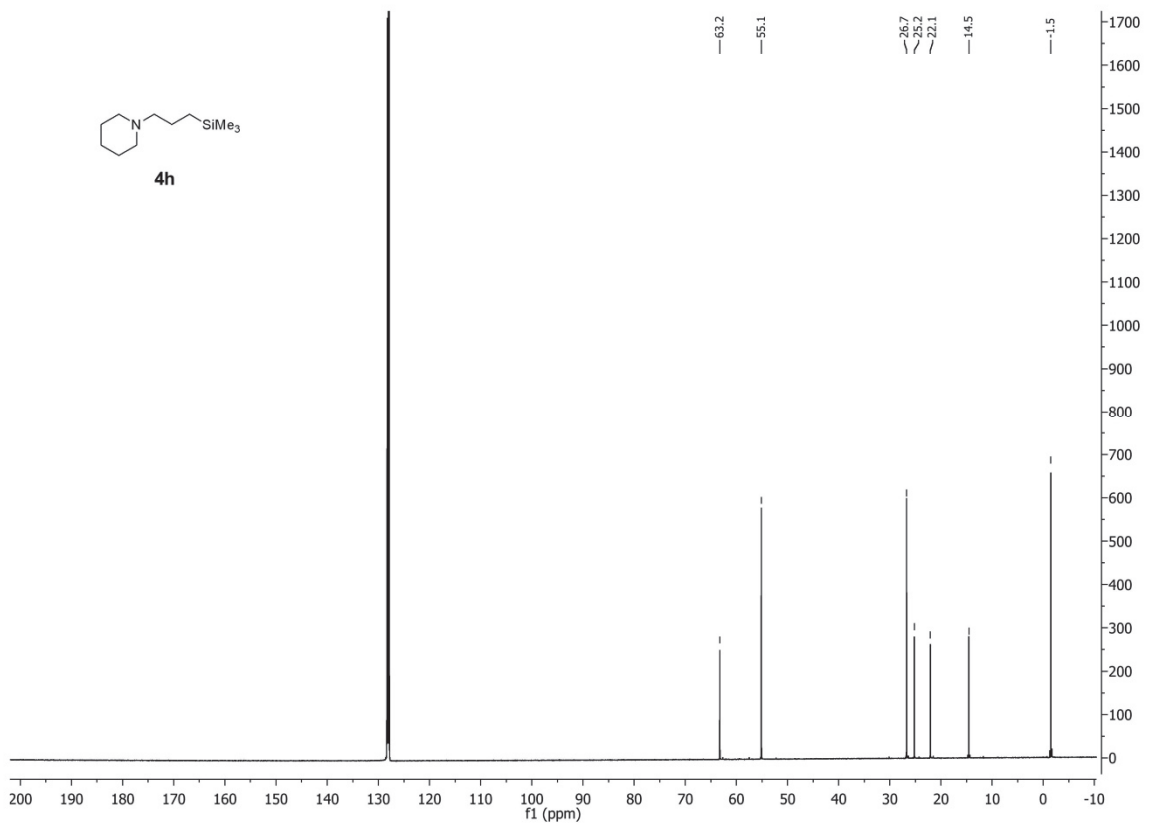





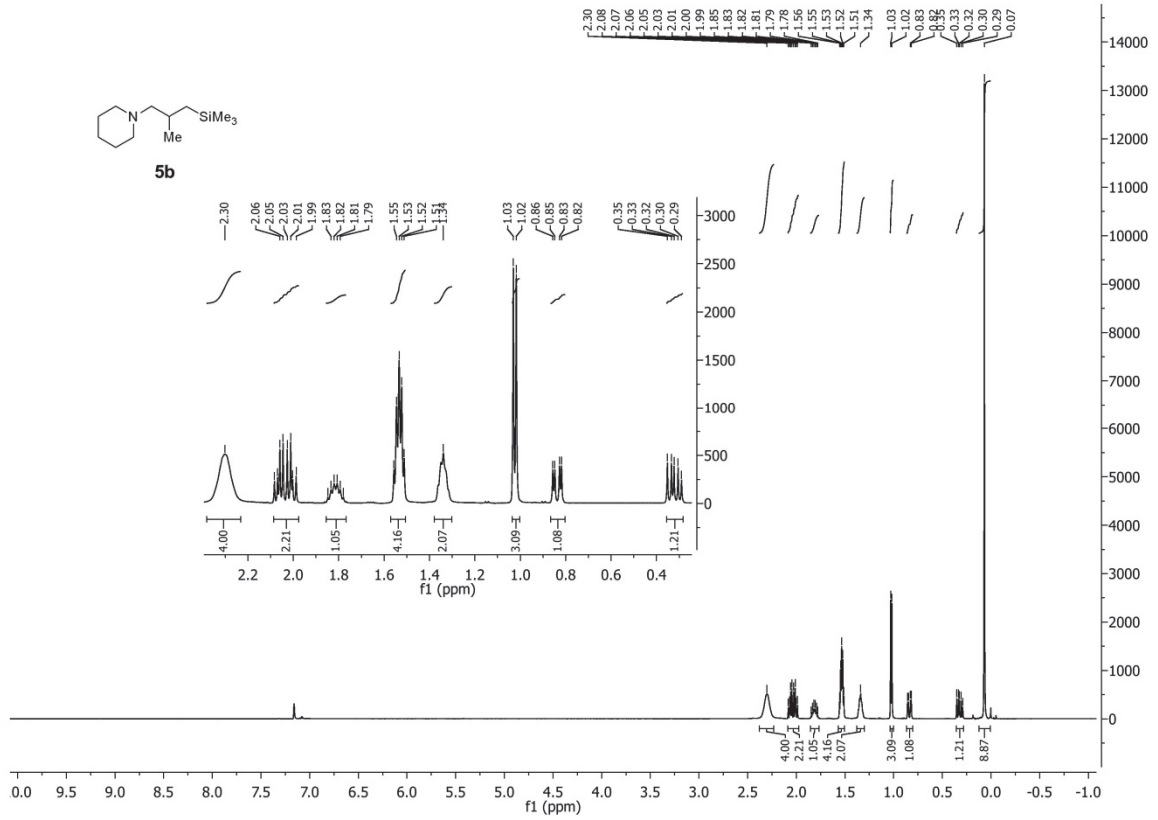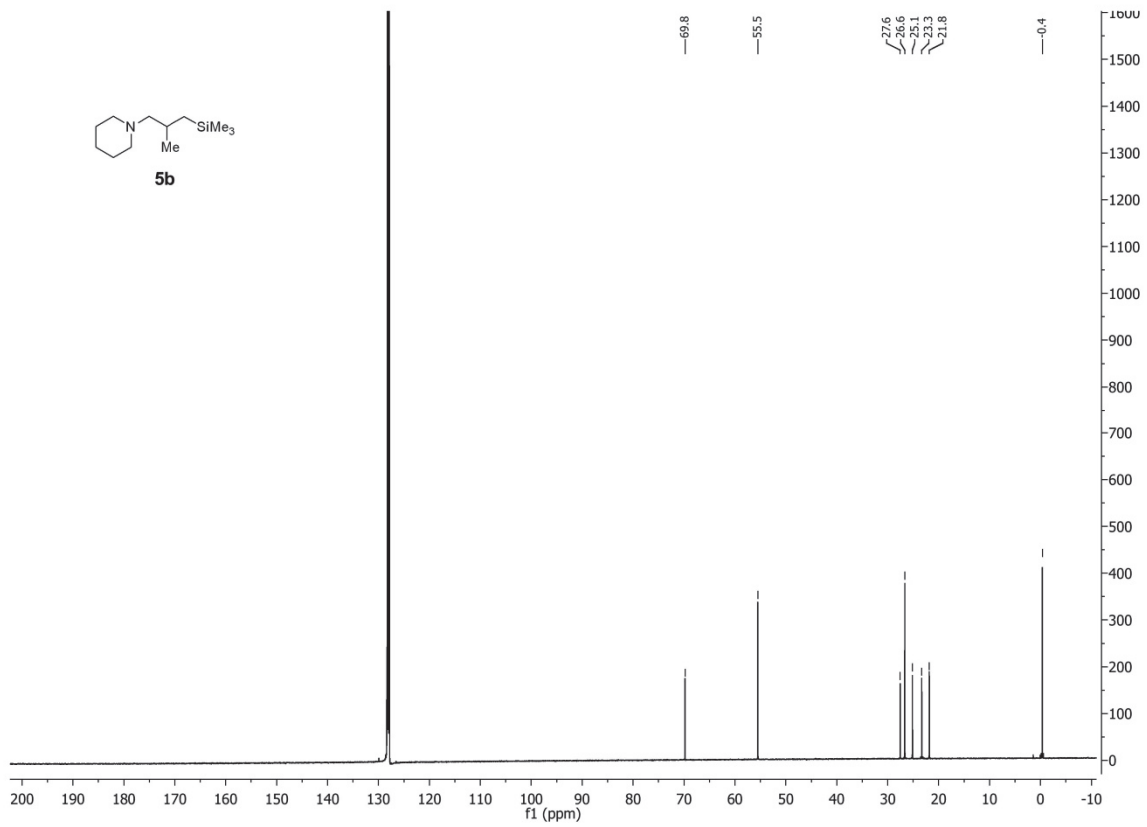

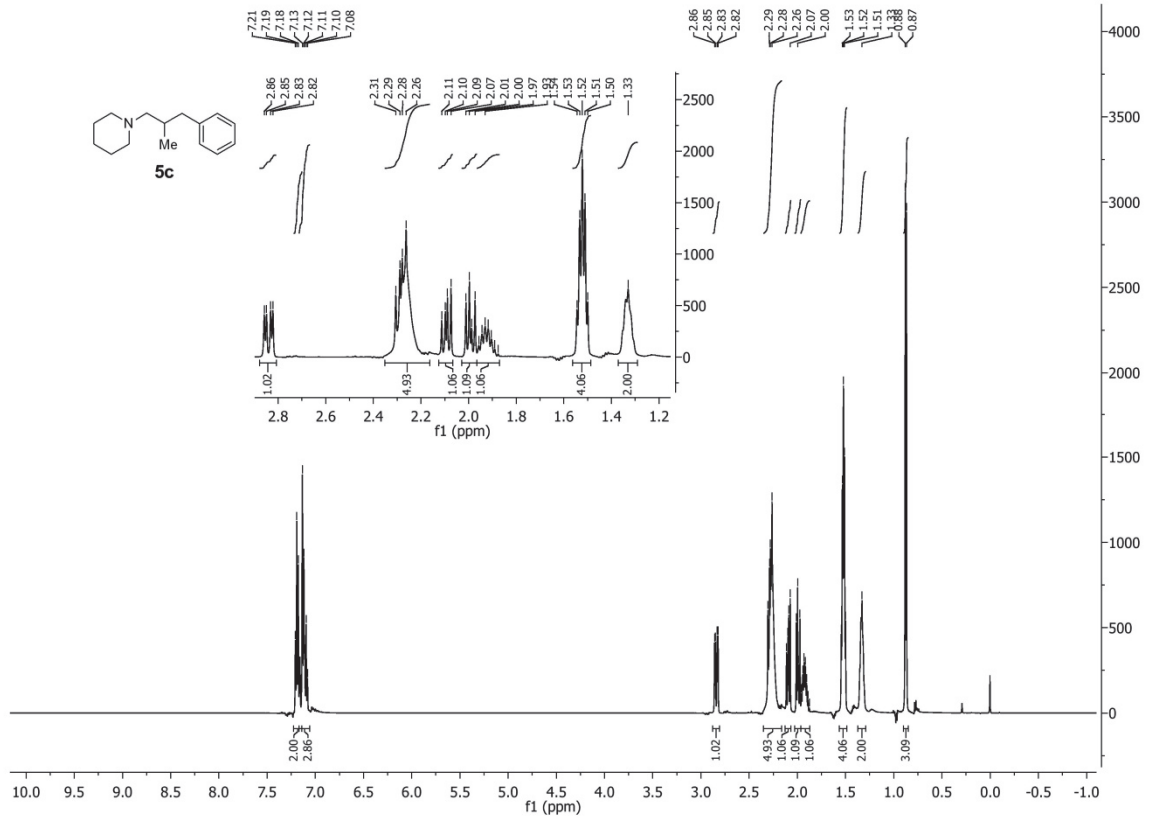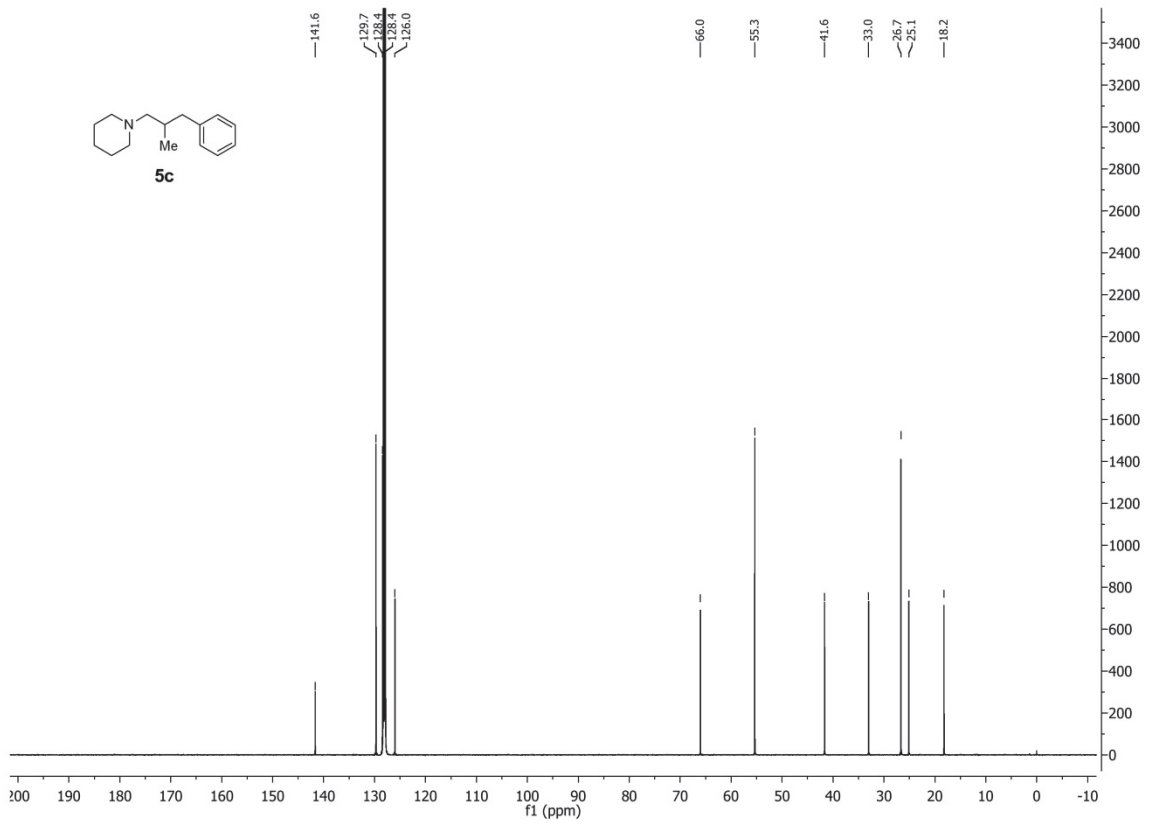

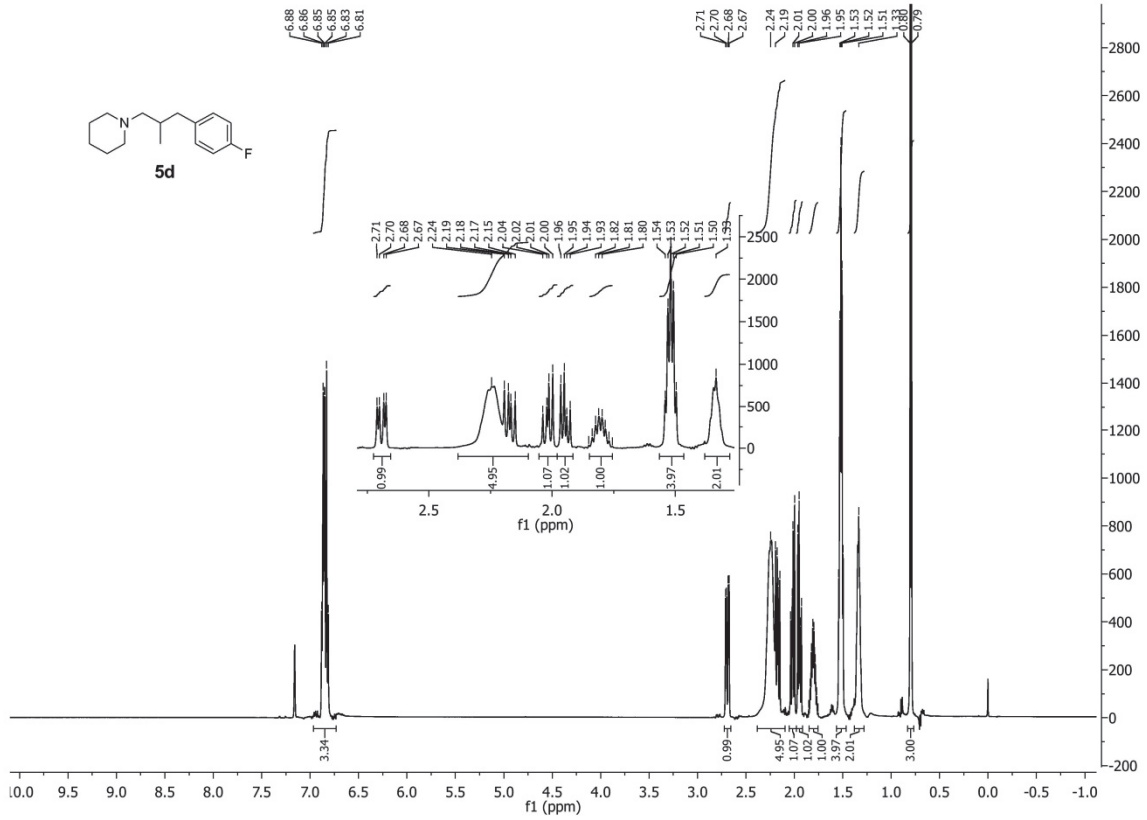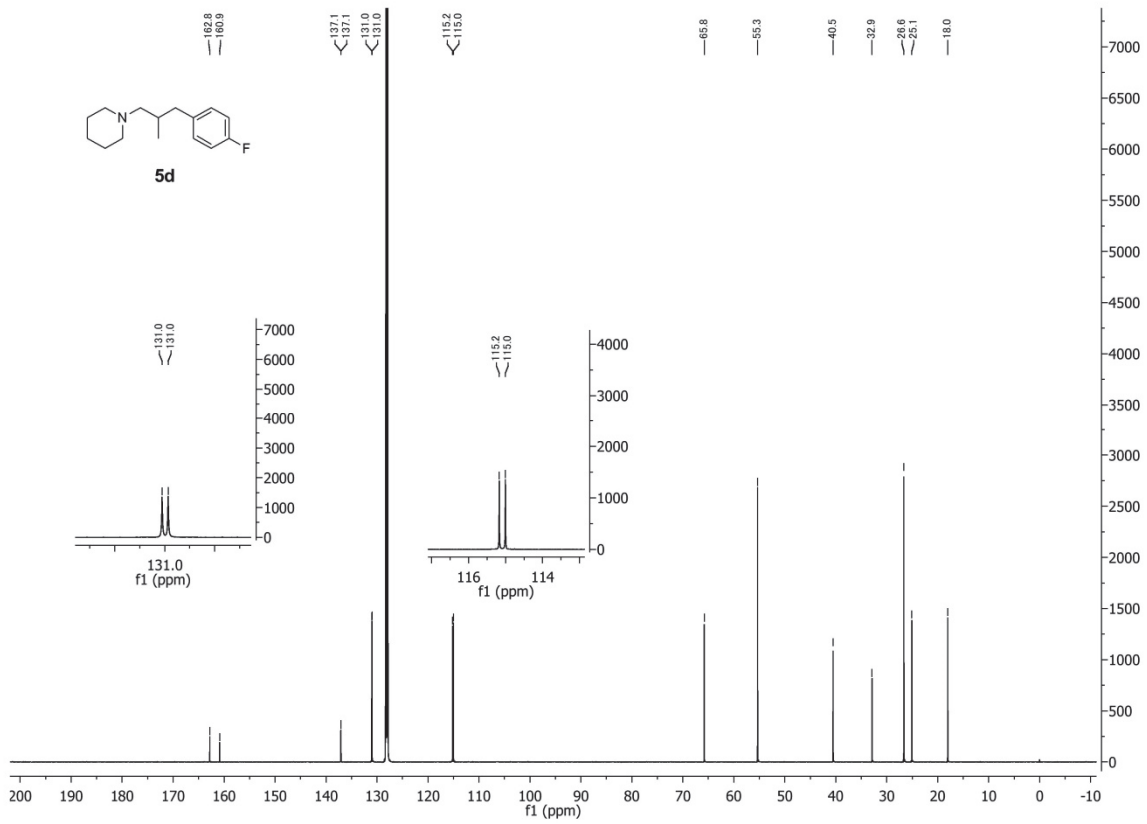

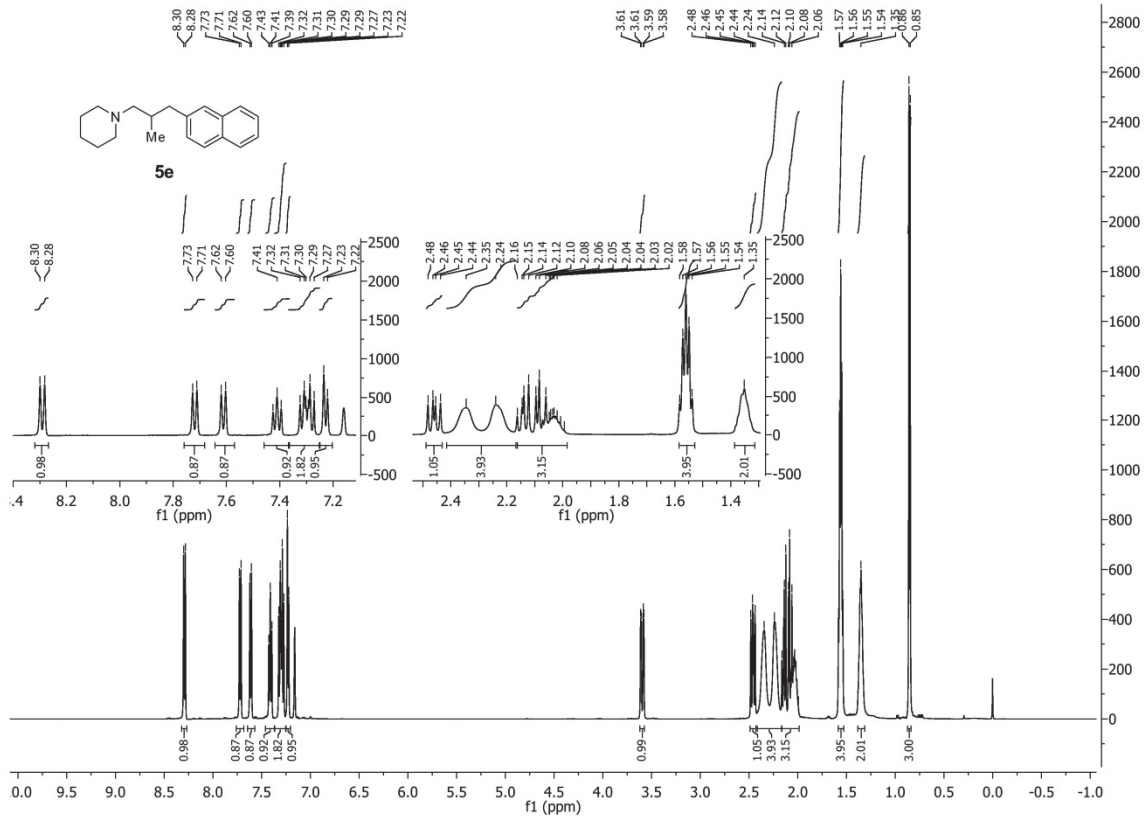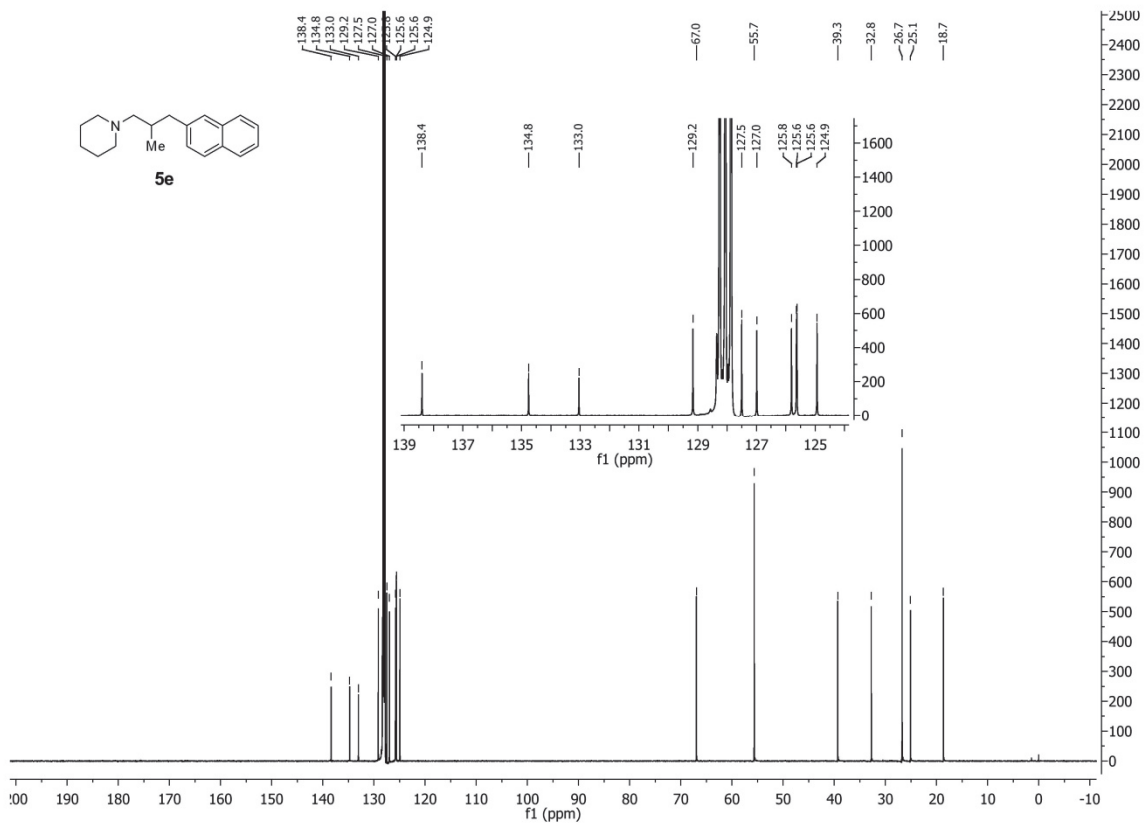

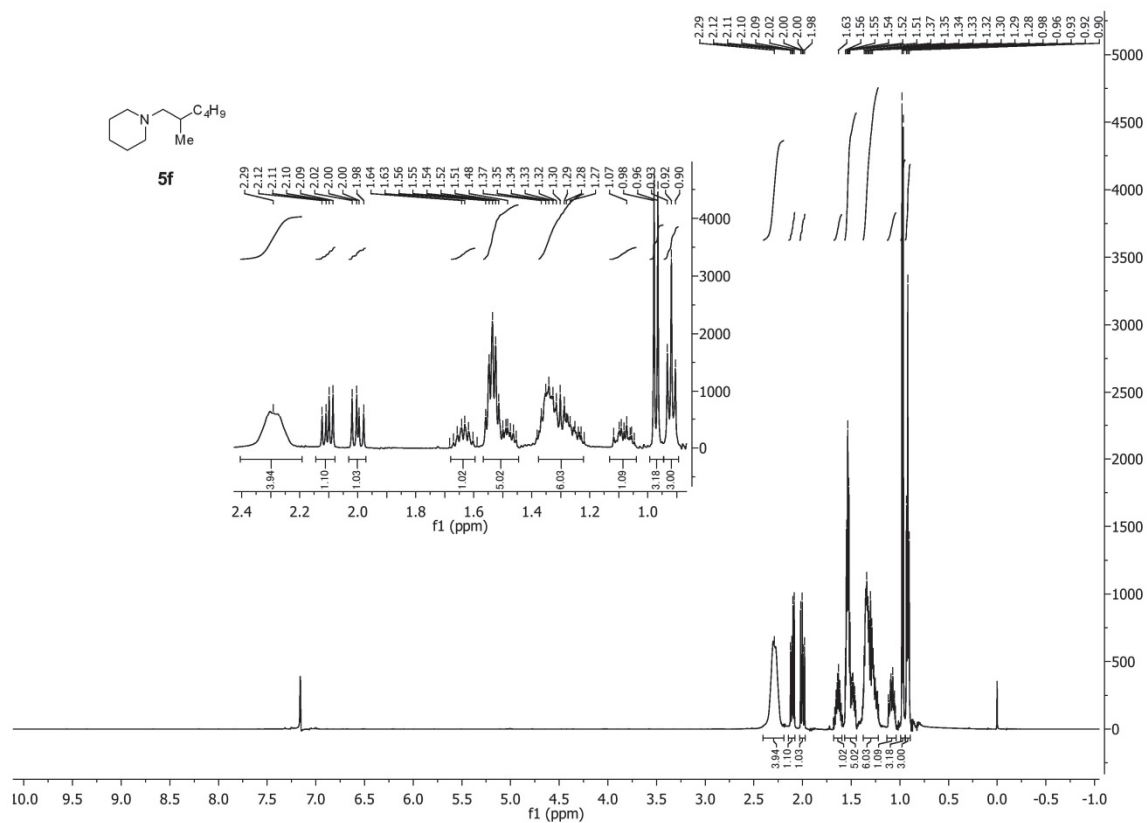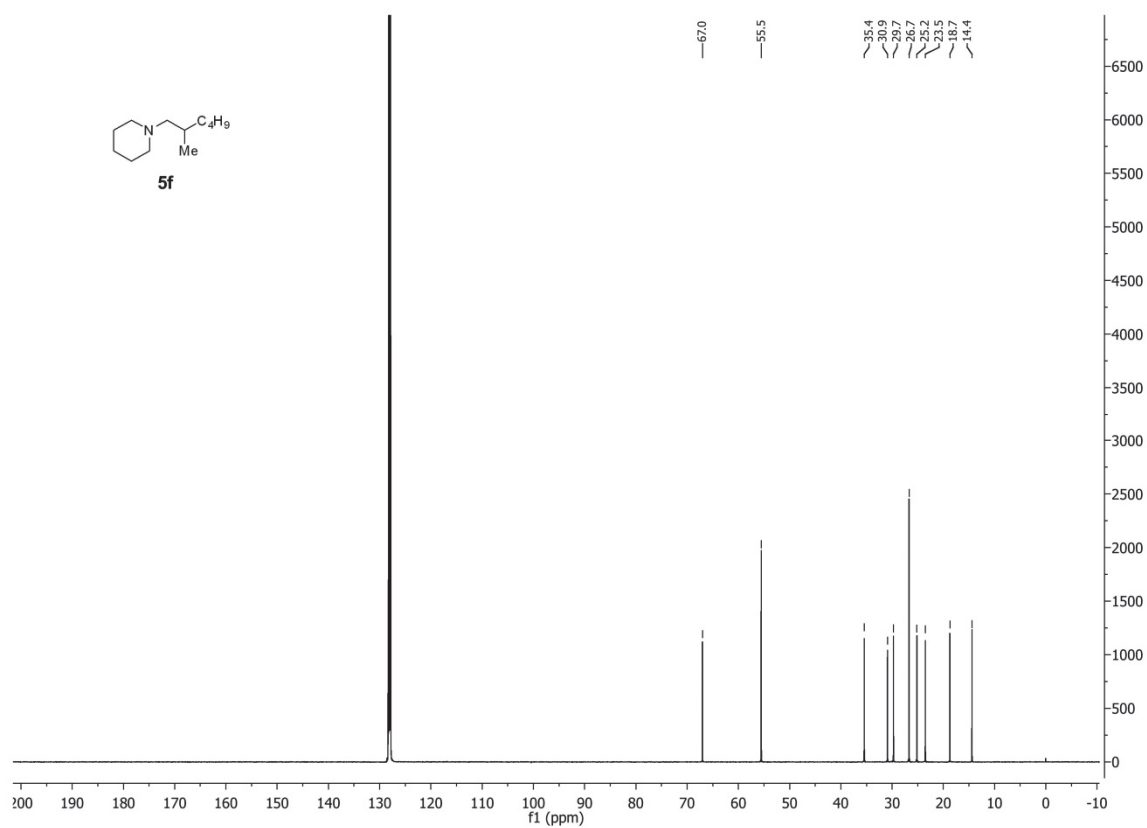

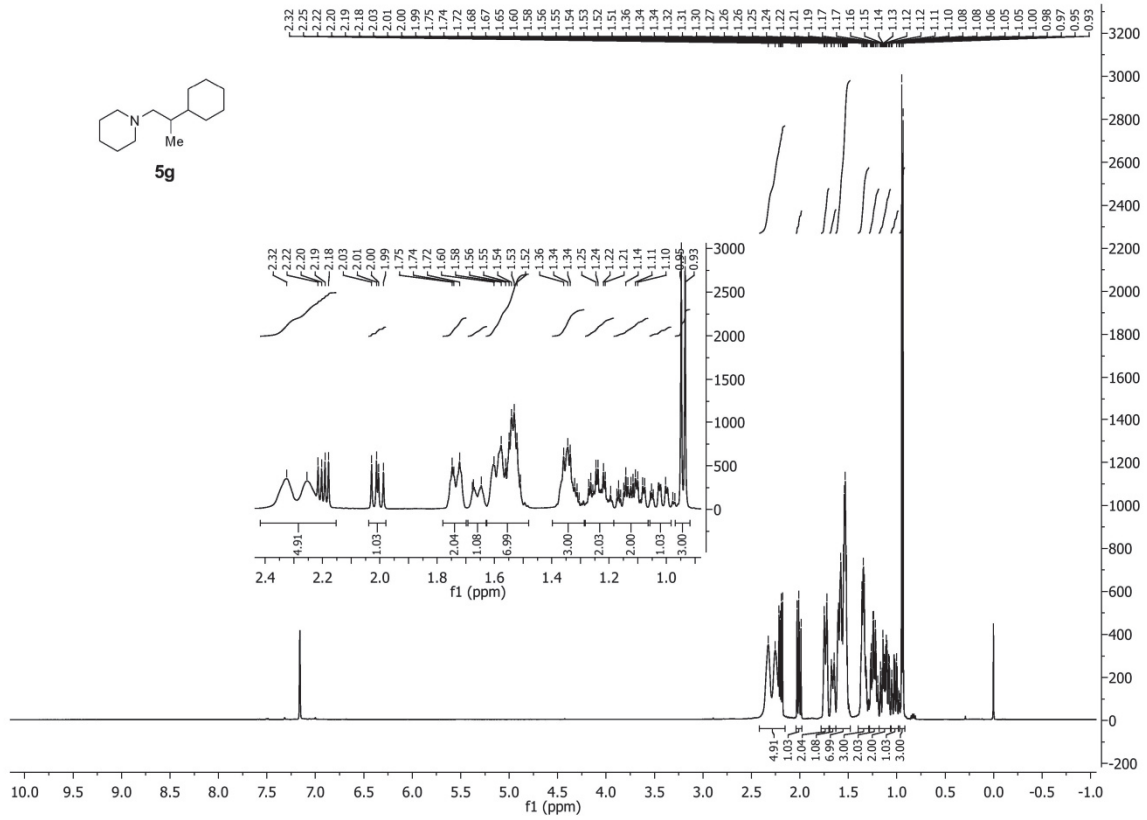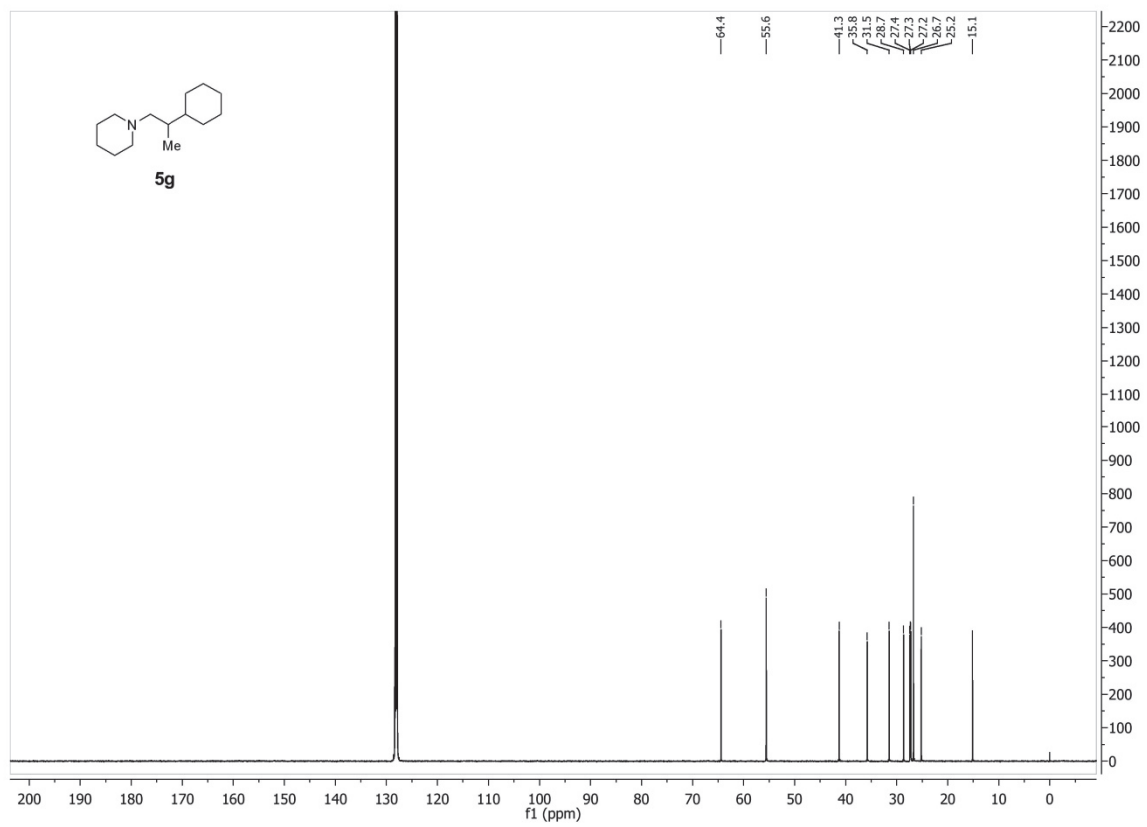

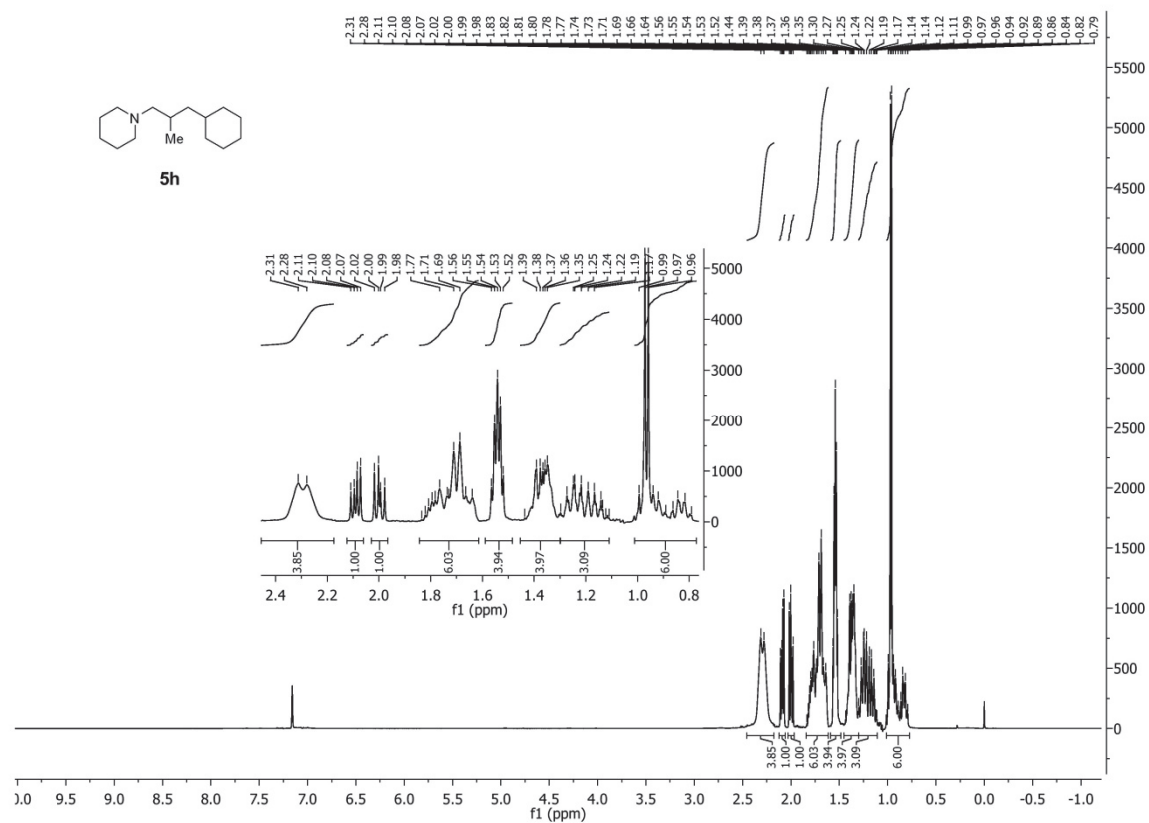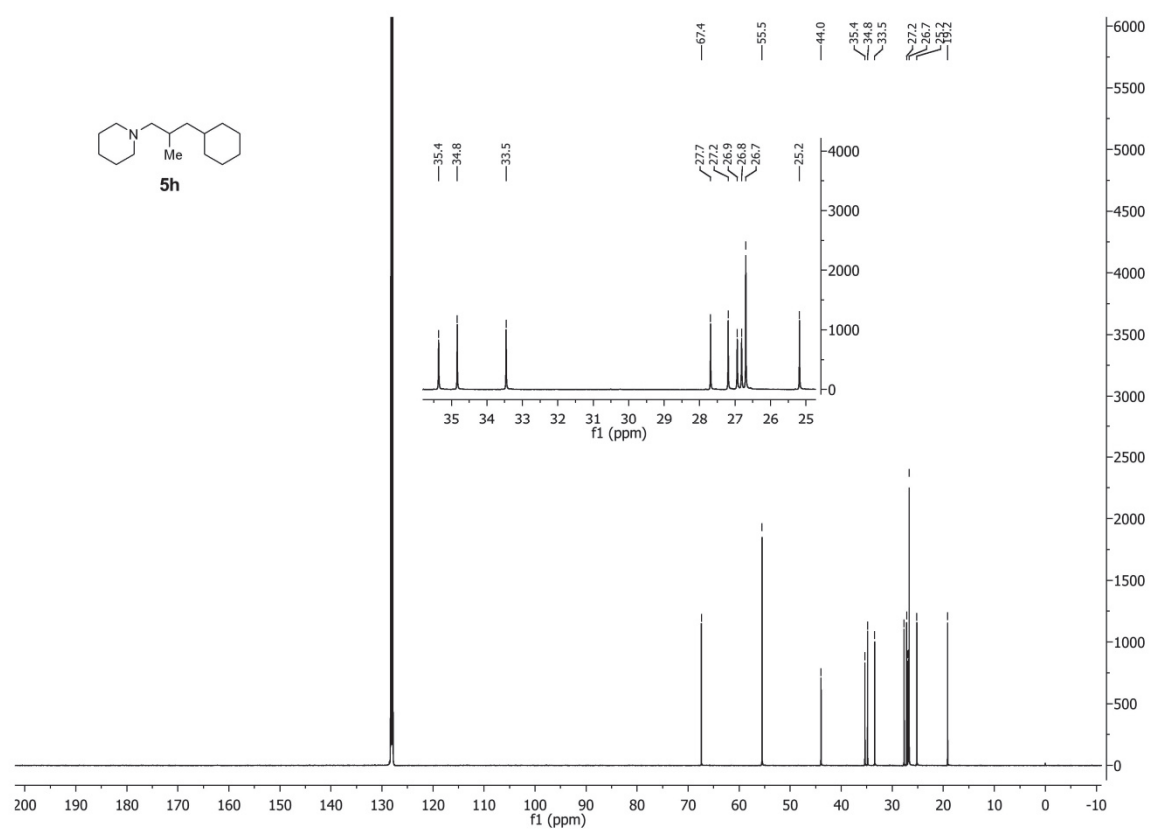



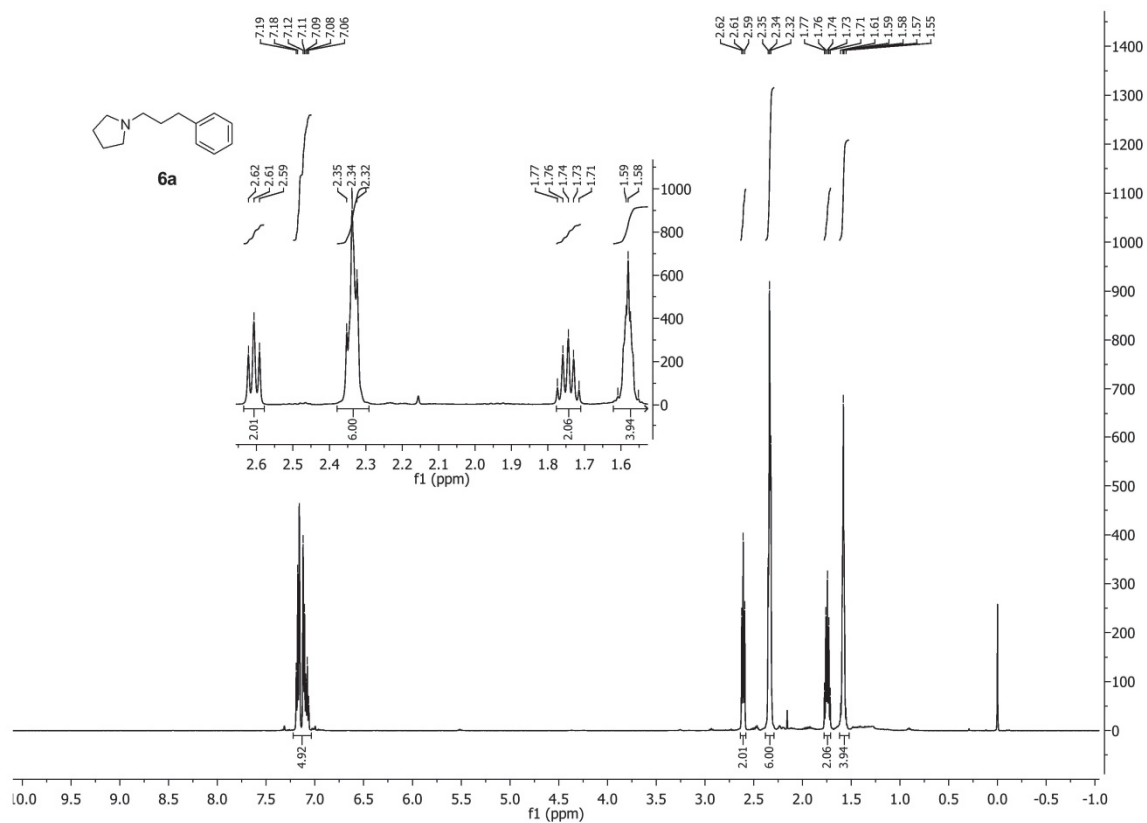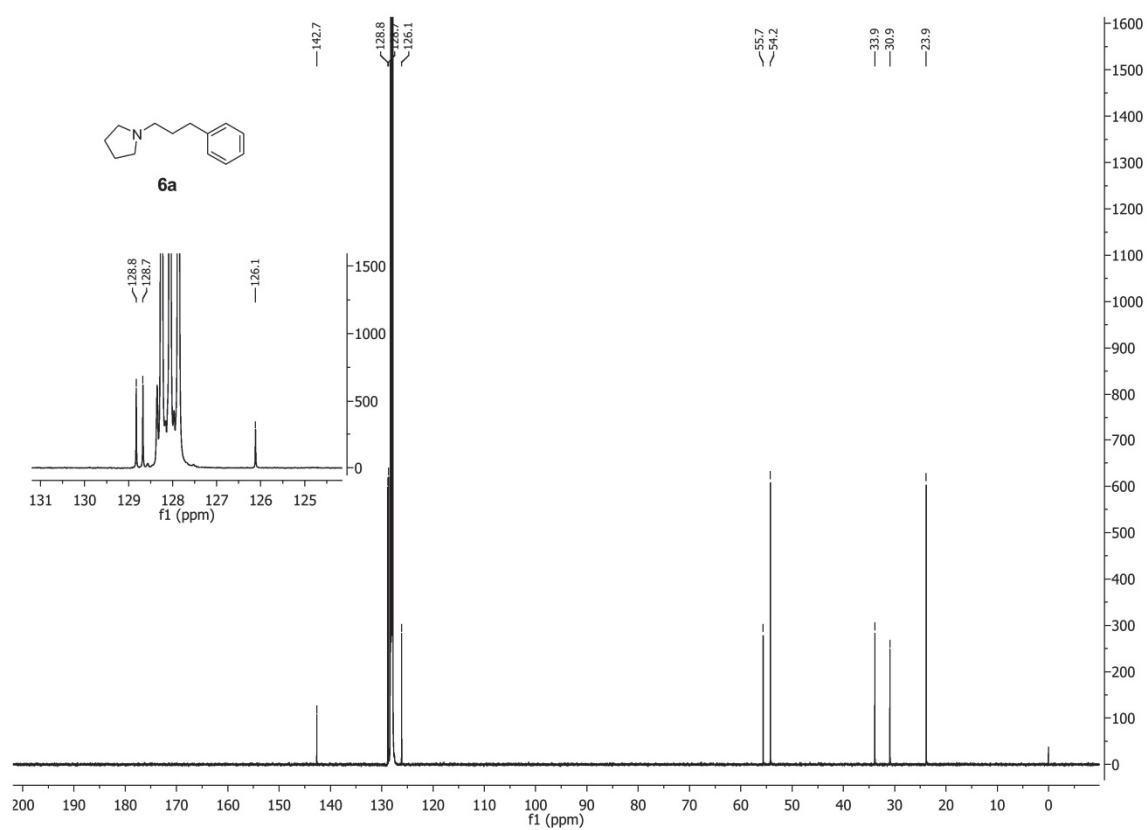

Supplement: SC-007-C6SC02129H-s001.pdf [file SC-007-C6SC02129H-s001.pdf]
